# Supplementary material for: Structure Optimization of 12β-O-γ-Glutamyl Oleanolic Acid Derivatives Resulting in Potent FXR Antagonist/Modulator for NASH Therapy
Source: MDPI journal article supplement (doi:10.3390/ph16050758), 2023-05-17
Supplement: s1 [file s1]

## Supporting Information

### Structure Optimization of 12 $\beta$ -O- $\gamma$ -Glutamyl Oleanolic Acid Derivatives Resulting In FXR Antagonist/Modulator for NASH therapy

Hao Ma <sup>1,†</sup>, Yunyang Bao <sup>2,†</sup>, Shuaishuai Niu <sup>1</sup>, Shaorong Wang <sup>1</sup>, Yiming Li <sup>2</sup>,

Hongwei He <sup>2</sup>, Na Zhang <sup>2</sup>, Weishuo Fang <sup>1,\*</sup>

<sup>1</sup> State Key Laboratory of Bioactive Substances and Functions of Natural Medicines & Ministry of Health Key Laboratory of Biosynthesis of Natural Products, Institute of Materia Medica, Chinese Academy of Medical Sciences & Peking Union Medical College, 2A Nan Wei Road, Beijing 100050, China

<sup>2</sup> Key Laboratory of Biotechnology of Antibiotics, the National Health and Family Planning Commission (NHFP), Institute of Medicinal Biotechnology, Chinese Academy of Medical Sciences and Peking Union Medical College, Beijing 100050, China

\* Correspondence: wfang@imm.ac.cn

<sup>†</sup>: These authors contributed equally to this work.

| Contents                                                                                                             | Page |
|----------------------------------------------------------------------------------------------------------------------|------|
| 1. Preparation of key intermediate <b>8</b>                                                                          | 2    |
| 2. Preparation of $\gamma$ -glutamic acids <b>14a~h</b> and <b>18a~h</b> bearing different size of protecting groups | 3    |
| 3. Stability test of compound <b>10b</b>                                                                             | 8    |
| 4. Compound <b>10b</b> affects markers of liver injury and hepatic fibrosis in BDL rats                              | 9    |
| 5. Compound <b>10b</b> affects serum biochemical markers in HFD mice                                                 | 10   |
| 6. Binding model of 12 $\beta$ -OA derivative interacting with FXR-LBD                                               | 11   |
| 7. NMR and HRMS spectra of all compounds                                                                             | 12   |

## 1. Preparation of key intermediate **8**

Starting with oleanolic acid (OA, **6**), the C-28 carboxyl group was protected with benzyl (Bn) to create benzyl 3 $\beta$ -hydroxy-olean-28-oate (Scheme S1), which improved the solubility of the substrates and facilitated product purification in subsequent reactions. The t-butylmethylsilyl (TBS) was chosen to protect 3-OH group. This yielded the 3-*O*-TBS derivative in high yield (81%) upon treatment with t-butyldimethylsilyl trifluoromethanesulfonate (TBSOTf) and imidazole. We prepared the 12-oxo derivative through *m*-CPBA oxidation of the olefin, followed by rearrangement of an epoxide intermediate. The newly formed chiral center (C-13) was assigned as  $\beta$  based on stereochemistry described previously, which was supported by an NOESY experiment. The C-12 carbonyl group was then reduced using NaBH<sub>4</sub> in tetrahydrofuran (THF) in the presence of trace water to produce the 12 $\beta$ - and 12 $\alpha$ -hydroxyl derivatives in a ratio of approximately 2:1. The 12 $\beta$ -hydroxy OA (**8**) was finally separated through chromatography on silica gel (Pe/EtOAc: 20:1-10:1).

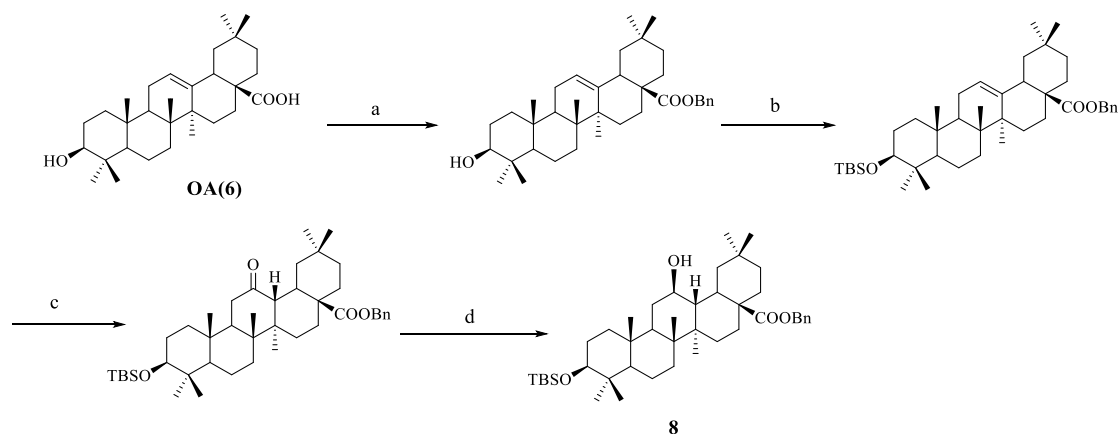

**Scheme S1.** Synthesis route for key intermediate **8**. *Reagents and conditions:* (a) BnBr, K<sub>2</sub>CO<sub>3</sub>, tetrabutylammonium bromide (TBAB), THF, H<sub>2</sub>O; (b) TBSOTf, imidazole, CH<sub>2</sub>Cl<sub>2</sub>; (c) *m*-CPBA, CH<sub>2</sub>Cl<sub>2</sub>; (d) NaBH<sub>4</sub>, THF.

## 2. Preparation of $\gamma$ -glutamic acids bearing different size of protecting groups.

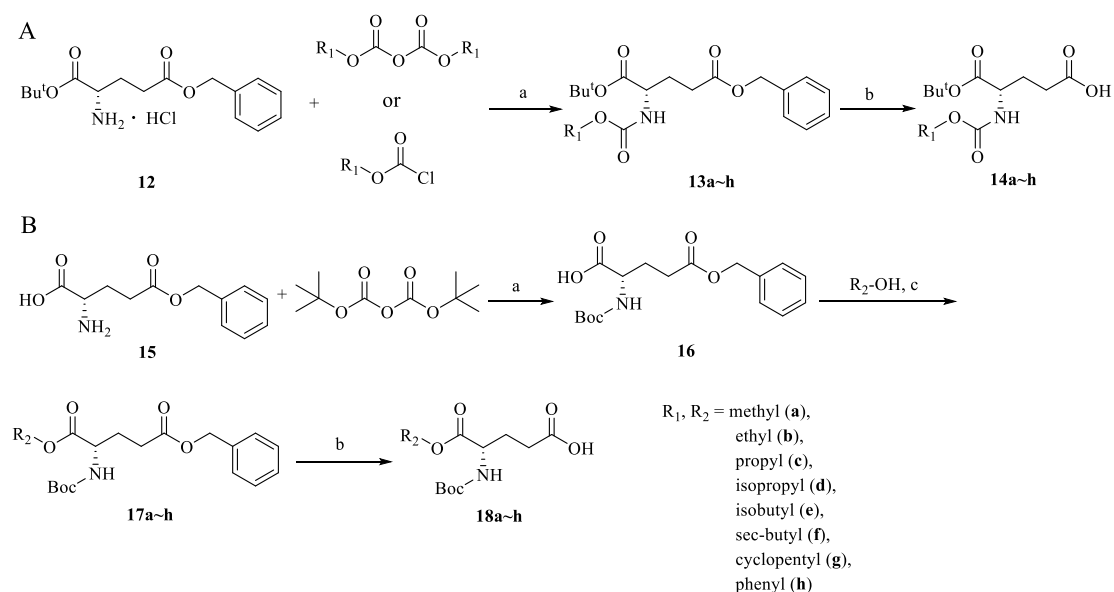

**Scheme S2.** Preparation of the corresponding  $\gamma$ -glutamic acids. Reagents and conditions: (a) DIPEA, THF/H<sub>2</sub>O 4:1, 23°C for 8 h, yield: > 98% (for anhydride), or DIPEA, DCM, 23°C for 4 h, yield: >98% (for acyl chloride); (b) Pd/C, hydrogen (1 atm.), MeOH, 23°C for 6 h, yield: 55.7~97.1%; (c) DIC, 4-DMAP, DCM, 23°C for 8 h, yield: >98%.

As shown in Scheme S2, For  $\alpha$ -carboxyl terminal protected by *tert*-butyl ester, amino-terminal introduced different substituents of glutamic acid modification, the following method was prepared as follows: to a solution of *L*-glutamic acid-5-benzyl ester-1-*tert*-butyl ester hydrochloride (1 g, 3.0 mmol, 1.0 eq.) in 15 mL of THF/H<sub>2</sub>O 4:1 mixture, DIPEA 1.3 mL (9.0 mmol, 3.0 eq.) and acid anhydrides containing different substituents (2.0 eq.) were slowly added. The reaction mixture was stirred at room temperature for 12 hours (if it is acid chlorides substituted by different substituents, the reaction solvent should be adjusted to dry DCM, and the reagent equivalent should be the same as above). Then the mixture was diluted with water and extracted with ethyl acetate. The organic layers were combined and dried over sodium sulfate and concentrated in vacuum to obtain crude product using to the next step without any purification. The obtained intermediates were dissolved in 15 mL of methanol, with 10% of the mass of palladium carbon. The hydrogen gas at 1 atmosphere was passed through, and the reaction mixture was stirred at room temperature. After 6 hours, the mixture was diluted with water and extracted with ethyl acetate. The organic layers were combined and dried over sodium sulfate and concentrated in vacuum to obtain crude products, and then directly subjected to flash chromatography on silica gel using PE/EtOAc (2:1) to obtain intermediates quantitatively.

*5-(tert-butoxy)-4-((methoxycarbonyl)amino)-L-glutamic acid (14a).*

White solid 441 mg, overall yield: 55.7%.  $[\alpha]_{\text{D}}^{20} = +14.4^{\circ}$  (c 1.3, CHCl<sub>3</sub>). <sup>1</sup>H NMR (400 MHz, CDCl<sub>3</sub>)  $\delta$  (ppm): 10.66 (br, 1H, COOH), 5.40 (d, 1H,  $J = 6.8$  Hz, NH), 4.26-4.32 (m, 1H, 4-H), 3.68 (s, 3H, OCH<sub>3</sub>), 2.37-2.53 (m, 2H, 2-2H), 2.17-2.20 (m, 1H, 3-H<sub>a</sub>), 1.90-1.99 (m, 1H, 3-H<sub>b</sub>), 1.47 (s, 9H, OBu<sup>t</sup>). <sup>13</sup>C NMR (100 MHz, CDCl<sub>3</sub>)  $\delta$  (ppm): 178.0, 171.1, 156.8, 82.7, 53.7, 52.4, 30.0, 28.0, 27.8. MS (ESI)  $m/z$  284.2 (M+Na)<sup>+</sup>.

*5-(tert-butoxy)-4-((ethoxycarbonyl)amino)-L-glutamic acid (14b).*

White solid 792 mg, overall yield: 94.8%.  $[\alpha]_{\text{D}}^{20} = +11.4^{\circ}$  (c 1.2, CHCl<sub>3</sub>). <sup>1</sup>H NMR (400 MHz, CDCl<sub>3</sub>)  $\delta$  (ppm): 10.56 (br, 1H, COOH), 5.34 (d, 1H,  $J = 7.6$  Hz, NH), 4.26-4.32 (m, 1H, 4-H), 4.12 (q, 2H,  $J = 6.8$  Hz, OCH<sub>2</sub>CH<sub>3</sub>), 2.37-2.53 (m, 2H, 2-2H), 2.15-2.23 (m, 1H, 3-H<sub>a</sub>), 1.89-1.99 (m, 1H, 3-H<sub>b</sub>), 1.47 (s, 9H, OBu<sup>t</sup>), 1.25 (t, 3H,  $J = 7.2$  Hz, OCH<sub>2</sub>CH<sub>3</sub>). <sup>13</sup>C NMR (100 MHz, CDCl<sub>3</sub>)  $\delta$  (ppm): 177.9, 171.1, 156.4, 82.6, 61.3, 53.5, 30.0, 28.0, 28.0, 14.5. MS (ESI)  $m/z$  298.1 (M+Na)<sup>+</sup>.

*5-(tert-butoxy)-4-((propoxycarbonyl)amino)-L-glutamic acid (14c).*

White solid 758 mg, overall yield: 86.4%.  $[\alpha]_{\text{D}}^{20} = +10.8^{\circ}$  (c 2.0, CHCl<sub>3</sub>). <sup>1</sup>H NMR (400 MHz, CDCl<sub>3</sub>)  $\delta$  (ppm): 10.58 (br, 1H, COOH), 5.34 (d, 1H,  $J = 7.2$  Hz, NH), 4.27-4.32 (m, 1H, 4-H), 4.12 (t, 2H,  $J = 6.4$  Hz, OCH<sub>2</sub>CH<sub>2</sub>CH<sub>3</sub>), 2.37-2.53 (m, 2H, 2-2H), 2.17-2.23 (m, 1H, 3-H<sub>a</sub>), 1.89-1.99 (m, 1H, 3-H<sub>b</sub>), 1.59-1.68 (m, 2H, OCH<sub>2</sub>CH<sub>2</sub>CH<sub>3</sub>), 1.47 (s, 9H, OBu<sup>t</sup>), 0.93 (t, 3H,  $J = 7.2$  Hz, OCH<sub>2</sub>CH<sub>2</sub>CH<sub>3</sub>). <sup>13</sup>C NMR (100 MHz, CDCl<sub>3</sub>)  $\delta$  (ppm): 177.8, 171.1, 156.5, 82.6, 66.9, 53.5, 30.0, 28.0, 28.0, 22.3, 10.3. MS (ESI)  $m/z$  312.2 (M+Na)<sup>+</sup>.

*5-(tert-butoxy)-4-((isopropoxycarbonyl)amino)-L-glutamic acid (14d).*

White solid 836 mg, overall yield: 95.3%.  $[\alpha]_{\text{D}}^{20} = +9.0^{\circ}$  (c 1.2, CHCl<sub>3</sub>). <sup>1</sup>H NMR (400 MHz, CDCl<sub>3</sub>)  $\delta$  (ppm): 9.80 (br, 1H, COOH), 5.26 (d, 1H,  $J = 7.6$  Hz, NH), 4.86-4.92 (m, 1H, OCHMe<sub>2</sub>), 4.27-4.30 (m, 1H, 4-H), 2.37-2.52 (m, 2H, 2-2H), 2.16-2.21 (m, 1H, 3-H<sub>a</sub>), 1.89-1.98 (m, 1H, 3-H<sub>b</sub>), 1.47 (s, 9H, OBu<sup>t</sup>), 1.23 (d, 6H,  $J = 6.0$  Hz, OCHMe<sub>2</sub>). <sup>13</sup>C NMR (100 MHz, CDCl<sub>3</sub>)  $\delta$  (ppm): 177.9, 171.1, 156.0, 82.5, 68.7, 53.5, 30.0, 28.0, 28.0, 22.0. MS (ESI)  $m/z$  312.3 (M+Na)<sup>+</sup>.

*5-(tert-butoxy)-4-((isobutoxycarbonyl)amino)-L-glutamic acid (14e).*

White solid 828 mg, overall yield: 90.1%.  $[\alpha]_{\text{D}}^{20} = +8.9^{\circ}$  (c 1.3, CHCl<sub>3</sub>). <sup>1</sup>H NMR

(400 MHz, CDCl<sub>3</sub>)  $\delta$  (ppm): 5.36 (br, 1H, NH), 4.26-4.31 (m, 1H, 4-H), 3.84 (d, 2H,  $J$  = 6.4 Hz, OCH<sub>2</sub>CHMe<sub>2</sub>), 2.37-2.52 (m, 2H, 2-2H), 2.15-2.23 (m, 1H, 3-H<sub>a</sub>), 1.85-1.96 (m, 2H, 3-H<sub>b</sub>, OCH<sub>2</sub>CHMe<sub>2</sub>), 1.47 (s, 9H, OBU<sup>t</sup>), 0.92 (d, 6H,  $J$  = 6.4 Hz, OCH<sub>2</sub>CHMe<sub>2</sub>). <sup>13</sup>C NMR (100 MHz, CDCl<sub>3</sub>)  $\delta$  (ppm): 177.7, 171.2, 156.5, 82.6, 71.4, 53.6, 30.0, 28.0, 28.0, 28.0, 19.0. MS (ESI)  $m/z$  326.3 (M+Na)<sup>+</sup>.

*5-(tert-butoxy)-4-((sec-butoxycarbonyl)amino)-L-glutamic acid (14f).*

White solid 972 mg, overall yield: 97.1%. [ $\alpha$ ]<sub>D</sub><sup>20</sup> = +7.8° (c 1.9, CHCl<sub>3</sub>). <sup>1</sup>H NMR (400 MHz, CDCl<sub>3</sub>)  $\delta$  (ppm): 10.29 (br, 1H, COOH), 5.26 (d, 1H,  $J$  = 7.6 Hz, NH), 4.70-4.74 (m, 1H, 1'-H), 4.26-4.31 (m, 1H, 4-H), 2.37-2.52 (m, 2H, 2-2H), 2.15-2.20 (m, 1H, 3-H<sub>a</sub>), 1.89-1.98 (m, 1H, 3-H<sub>b</sub>), 1.50-1.63 (m, 2H, 2'-2H), 1.47 (s, 9H, OBU<sup>t</sup>), 1.20 (d, 3H,  $J$  = 6.0 Hz, 1'-CH<sub>3</sub>), 0.90 (t, 3H,  $J$  = 7.6 Hz, 3'-3H). <sup>13</sup>C NMR (100 MHz, CDCl<sub>3</sub>)  $\delta$  (ppm): 177.7, 171.1, 156.3, 82.5, 73.3, 53.5, 30.0, 29.0, 28.0, 28.0, 19.7, 9.6. MS (ESI)  $m/z$  326.3 (M+Na)<sup>+</sup>.

*5-(tert-butoxy)-4-(((cyclopentyloxy)carbonyl))amino)-L-glutamic acid (14g).*

White solid 811 mg, overall yield: 84.8%. [ $\alpha$ ]<sub>D</sub><sup>20</sup> = +7.7° (c 1.7, CHCl<sub>3</sub>). <sup>1</sup>H NMR (400 MHz, CDCl<sub>3</sub>)  $\delta$  (ppm): 10.28 (br, 1H, COOH), 5.24 (d, 1H,  $J$  = 7.6 Hz, NH), 5.08 (br, 1H, cyclopentyl-H), 4.26-4.31 (m, 1H, 4-H), 2.36-2.52 (m, 2H, 2-2H), 2.15-2.21 (m, 1H, 3-H<sub>a</sub>), 1.90-1.97 (m, 1H, 3-H<sub>b</sub>), 1.80-1.85 (m, cyclopentyl-2H), 1.68-1.70 (m, 4H, cyclopentyl-4H), 1.53-1.60 (m, 2H, cyclopentyl-2H), 1.47 (s, 9H, OBU<sup>t</sup>). MS (ESI)  $m/z$  338.3 (M+Na)<sup>+</sup>. Known compound.

*5-(tert-butoxy)-4-((phenoxycarbonyl)amino)-L-glutamic acid (14h).*

White solid 803 mg, overall yield: 81.9%. [ $\alpha$ ]<sub>D</sub><sup>20</sup> = +10.1° (c 2.2, CHCl<sub>3</sub>). <sup>1</sup>H NMR (400 MHz, CDCl<sub>3</sub>)  $\delta$  (ppm): 7.35 (dd, 2H,  $J$  = 7.6, 8.4 Hz, Ph-2H), 7.20 (dd, 1H,  $J$  = 7.6, 8.4 Hz, Ph-H), 7.12 (d, 2H,  $J$  = 7.6 Hz, Ph-2H), 5.78 (d, 1H,  $J$  = 8.0 Hz, NH), 4.36 (ddd, 1H,  $J$  = 5.2, 8.0, 8.4 Hz, 4-H), 2.41-2.57 (m, 2H, 2-2H), 2.21-2.29 (m, 1H, 3-H<sub>a</sub>), 1.97-2.06 (m, 1H, 3-H<sub>b</sub>), 1.49 (s, 9H, OBU<sup>t</sup>). <sup>13</sup>C NMR (100 MHz, CDCl<sub>3</sub>)  $\delta$  (ppm): 177.9, 170.8, 154.4, 150.8, 129.3, 125.5, 121.6, 83.0, 53.8, 29.9, 28.0, 27.7. MS (ESI)  $m/z$  346.2 (M+Na)<sup>+</sup>.

For  $\alpha$ -carboxyl terminal modified with esters of different substituents and amino terminal protected by *tert*-butoxycarbonyl, the following method was prepared as follows: to a solution of *L*-glutamic acid- $\gamma$ -benzyl (1 g, 4.2 mmol, 1.0 eq.) in 15 mL

THF/H<sub>2</sub>O 4:1 mixture, DIPEA (1.3 mL, 9.0 mmol, 3.0 eq.) and (Boc)<sub>2</sub>O (2.0 eq.) were added slowly, and the mixture was stirred at 23°C for 12 hours. Then the mixture was diluted with water and extracted with ethyl acetate. The organic layers were combined and dried over sodium sulfate and concentrated in vacuum to obtain crude product using to the next step directly. The intermediate in DCM 15 mL was added alcohols with different substituents (equivalent ratio 1:1). Then DIC (1.0 eq.) and 4-DMAP (0.2 eq.) were added slowly, and the mixture was stirred at room temperature for 12 hours. Then the mixture was diluted with water and extracted with ethyl acetate. The organic layers were combined and dried over sodium sulfate and concentrated in vacuum to obtain crude products using to the next step without any purification. The corresponding  $\gamma$ -glutamic acids were prepared under the same catalytic hydrogenation conditions as previously described, and were subsequently subjected to flash chromatography on silica gel using PE/EtOAc (2:1) as the solvent.

*4-((tert-butoxycarbonyl)amino)-5-methoxy-L-glutamic acid (18a).*

White solid 325 mg, overall yield: 98.8%.  $[\alpha]_D^{20} = +13.9^\circ$  (c 1.2, CHCl<sub>3</sub>). <sup>1</sup>H NMR (400 MHz, CDCl<sub>3</sub>)  $\delta$  (ppm): 9.28 (br, 1H, COOH), 5.19 (d, 1H,  $J = 7.6$  Hz, NH), 4.34-4.40 (m, 1H, 4-H), 3.75 (s, 3H, OCH<sub>3</sub>), 2.39-2.53 (m, 2H, 2-2H), 2.17-2.22 (m, 1H, 3-H<sub>a</sub>), 1.92-1.97 (m, 1H, 3-H<sub>b</sub>), 1.44 (s, 9H, Boc). MS (ESI)  $m/z$  284.3 (M+Na)<sup>+</sup>. Known compound.

*4-((tert-butoxycarbonyl)amino)-5-ethoxy-L-glutamic acid (18b).*

White solid 314 mg, overall yield: 89.2%.  $[\alpha]_D^{20} = +12.0^\circ$  (c 1.4, CHCl<sub>3</sub>). <sup>1</sup>H NMR (400 MHz, CDCl<sub>3</sub>)  $\delta$  (ppm): 9.42 (br, 1H, COOH), 5.21 (d, 1H,  $J = 7.6$  Hz, NH), 4.31-4.36 (m, 1H, 4-H), 4.20 (q, 2H,  $J = 7.2$  Hz, OCH<sub>2</sub>CH<sub>3</sub>), 2.39-2.53 (m, 2H, 2-2H), 2.16-2.23 (m, 1H, 3-H<sub>a</sub>), 1.90-2.01 (m, 1H, 3-H<sub>b</sub>), 1.44 (s, 9H, Boc), 1.29 (t, 3H,  $J = 7.2$  Hz, OCH<sub>2</sub>CH<sub>3</sub>). MS (ESI)  $m/z$  298.2 (M+Na)<sup>+</sup>. Known compound.

*4-((tert-butoxycarbonyl)amino)-5-propoxy-L-glutamic acid (18c).*

White solid 286 mg, overall yield: 85.6%.  $[\alpha]_D^{20} = +10.5^\circ$  (c 1.2, CHCl<sub>3</sub>). <sup>1</sup>H NMR (400 MHz, CDCl<sub>3</sub>)  $\delta$  (ppm): 5.20 (d, 1H,  $J = 7.6$  Hz, NH), 4.32-4.38 (m, 1H, 4-H), 4.10 (t, 3H,  $J = 6.4$  Hz, OCH<sub>2</sub>CH<sub>2</sub>CH<sub>3</sub>), 2.39-2.54 (m, 2H, 2-2H), 2.16-2.23 (m, 1H, 3-H<sub>a</sub>), 1.92-1.99 (m, 1H, 3-H<sub>b</sub>), 1.63-1.72 (m, 2H, OCH<sub>2</sub>CH<sub>2</sub>CH<sub>3</sub>), 1.44 (s, 9H, Boc), 1.29 (t, 3H,  $J = 7.6$  Hz, OCH<sub>2</sub>CH<sub>2</sub>CH<sub>3</sub>). MS (ESI)  $m/z$  312.3 (M+Na)<sup>+</sup>. Known compound.

*4-((tert-butoxycarbonyl)amino)-5-isopropoxy-L-glutamic acid (18d).*

White solid 300 mg, overall yield: 75.4%.  $[\alpha]_{\text{D}}^{20} = +10.1^{\circ}$  (c 1.2, CHCl<sub>3</sub>). <sup>1</sup>H NMR (400 MHz, CDCl<sub>3</sub>)  $\delta$  (ppm): 5.20 (d, 1H,  $J = 7.6$  Hz, NH), 5.00-5.10 (m, 1H, OCHMe<sub>2</sub>), 4.27-4.32 (m, 1H, 4-H), 2.38-2.53 (m, 2H, 2-2H), 2.15-2.20 (m, 1H, 3-H<sub>a</sub>), 1.89-1.98 (m, 1H, 3-H<sub>b</sub>), 1.44 (s, 9H, Boc), 1.23 (d, 6H,  $J = 6.0$  Hz, OCHMe<sub>2</sub>). MS (ESI)  $m/z$  312.2 (M+Na)<sup>+</sup>. Known compound.

*4-((tert-butoxycarbonyl)amino)-5-isobutoxy-L-glutamic acid (18e).*

White solid 320 mg, overall yield: 81.0%.  $[\alpha]_{\text{D}}^{20} = +8.7^{\circ}$  (c 1.8, CHCl<sub>3</sub>). <sup>1</sup>H NMR (400 MHz, CDCl<sub>3</sub>)  $\delta$  (ppm): 11.21 (s, 1H, COOH), 5.20 (d, 1H,  $J = 8.0$  Hz, NH), 4.34-4.39 (m, 1H, 4-H), 3.92 (d, 2H,  $J = 6.8$  Hz, OCH<sub>2</sub>CHMe<sub>2</sub>), 2.39-2.54 (m, 2H, 2-2H), 2.18-2.23 (m, 1H, 3-H<sub>a</sub>), 1.91-2.01 (m, 2H, 3-H<sub>b</sub>, OCH<sub>2</sub>CHMe<sub>2</sub>), 1.44 (s, 9H, Boc), 0.94 (d, 6H,  $J = 6.8$  Hz, OCH<sub>2</sub>CHMe<sub>2</sub>). <sup>13</sup>C NMR (100 MHz, CDCl<sub>3</sub>)  $\delta$  (ppm): 178.0, 172.3, 155.5, 80.2, 71.6, 52.8, 30.1, 28.3, 27.8, 27.7, 19.0. MS (ESI)  $m/z$  326.3 (M+Na)<sup>+</sup>.

*4-((tert-butoxycarbonyl)amino)-5-(sec-butoxy)-L-glutamic acid (18f).*

White solid 325 mg, overall yield: 62.4%.  $[\alpha]_{\text{D}}^{20} = +8.2^{\circ}$  (c 1.0, CHCl<sub>3</sub>). <sup>1</sup>H NMR (400 MHz, CDCl<sub>3</sub>)  $\delta$  (ppm): 5.22 (d, 1H,  $J = 7.2$  Hz, NH), 4.89 (ddq, 1H,  $J = 3.2, 6.4, 13.2$  Hz, 1'-H), 4.29-4.34 (m, 1H, 4-H), 2.37-2.53 (m, 2H, 2-2H), 2.15-2.22 (m, 1H, 3-H<sub>a</sub>), 1.89-1.98 (m, 1H, 3-H<sub>b</sub>), 1.52-1.67 (m, 2H, 2'-2H), 1.44 (s, 9H, Boc), 1.23 (d, 3H,  $J = 5.6$  Hz, 1'-CH<sub>3</sub>), 0.90 (t, 3H,  $J = 7.6$  Hz, 3'-3H). <sup>13</sup>C NMR (100 MHz, CDCl<sub>3</sub>)  $\delta$  (ppm): 177.9, 171.9, 155.6, 80.1, 74.0, 53.0, 30.1, 28.7, 28.3, 27.9, 19.4, 9.7. MS (ESI)  $m/z$  326.3 (M+Na)<sup>+</sup>.

*4-((tert-butoxycarbonyl)amino)-5-cyclopentyloxy-L-glutamic acid (18g).*

White solid 344 mg, overall yield: 69.6%.  $[\alpha]_{\text{D}}^{20} = +7.8^{\circ}$  (c 1.4, CHCl<sub>3</sub>). <sup>1</sup>H NMR (400 MHz, CDCl<sub>3</sub>)  $\delta$  (ppm): 11.04 (br, 1H, COOH), 5.17-5.23 (m, 2H, NH, cyclopentyl-H), 4.26-4.31 (m, 1H, 4-H), 2.38-2.52 (m, 2H, 2-2H), 2.14-2.20 (m, 1H, 3-H<sub>a</sub>), 1.84-1.97 (m, 3H, 3-H<sub>b</sub>, cyclopentyl-2H), 1.68-1.76 (m, 4H, cyclopentyl-4H), 1.59-1.62 (m, 2H, cyclopentyl-2H), 1.44 (s, 9H, Boc). MS (ESI)  $m/z$  338.3 (M+Na)<sup>+</sup>. Known compound.

*4-((tert-butoxycarbonyl)amino)-5-phenoxy-L-glutamic acid (18h).*

White solid 155 mg, overall yield: 30.9%.  $[\alpha]_{\text{D}}^{20} = +10.4^{\circ}$  (c 1.8, CHCl<sub>3</sub>). <sup>1</sup>H NMR (400 MHz, CDCl<sub>3</sub>)  $\delta$  (ppm): 7.38 (dd, 2H,  $J = 8.0, 8.4$  Hz, Ph-2H), 7.23-7.26 (m, 1H,

Ph-H), 7.10 (d, 2H,  $J = 8.0$  Hz, Ph-2H), 5.22 (d, 1H,  $J = 8.0$  Hz, NH), 4.58-4.61 (m, 1H, 4-H), 2.51-2.65 (m, 2H, 2-2H), 2.36-2.39 (m, 1H, 3-H<sub>a</sub>), 2.09-2.15 (m, 1H, 3-H<sub>b</sub>), 1.47 (s, 9H, Boc). MS (ESI)  $m/z$  346.3 (M+Na)<sup>+</sup>. Known compound.

### 3. Stability test of compound **10b**

To preliminarily determine the stability of compound **10b** in a biological environment, an in vitro experimental verification method was employed. The trace compound was dissolved in mouse plasma to simulate the biological environment. Samples were taken at different time intervals at 37°C, and the content of the compound was determined by HPLC C18 analytical column. The peak area of the absorption at 220 nm was utilized for content calculation.

The standard curve shown in Fig. S1 can be plotted using the peak area and the mass of compound **10b** in the corresponding volume of the solution. The relationship is  $y = 23.253x + 100.67$  ( $R^2 = 0.9994$ ), which meets linearity requirements and can be used for subsequent operations.

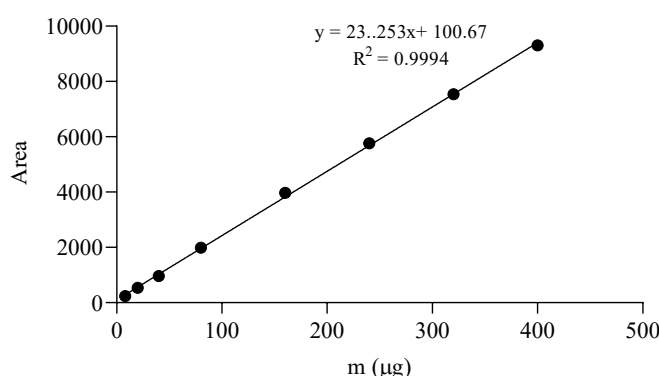

**Fig. S1.** The relationship curve between the absorption peak area and mass of compound **10b** at 220 nm.

Subsequently, a mouse with a body weight of 20 g and blood volume of 1 mL was calculated based on the subsequent in vivo experiment's dosage (100 mg·Kg<sup>-1</sup>). Assuming 100% absorption, the converted plasma drug concentration is 2 mg·mL<sup>-1</sup>. Based on the calculation, 0.5 mg of **10b** was added to 200 mL of mouse plasma to prepare a mixed solution. The plasma was then processed after 1h, 6h, 12 h, 24 h, and 48 h, respectively. The compound content in the sample was compared to the initial content with UV absorption and retention time ( $t = 6.5$  min). As shown in Table S1, no significant decrease in the content of **10b** was observed between 0 to 48 hours, indicating that compound **10b** existed stably in mouse plasma.

**Table S1.** The contents of compound **10b** extracted from mouse plasma in different time periods.

| Time (37°C) | Peak area | Mass of <b>10b</b> (μg) | Theoretical mass of <b>10b</b> (μg) | Recovery rate |
|-------------|-----------|-------------------------|-------------------------------------|---------------|
| 0 h         | 710.1     | 26.2                    | 38.5                                | 68.0 %        |
| 1 h         | 743.3     | 27.3                    | 38.5                                | 70.9 %        |
| 6 h         | 781.0     | 29.2                    | 38.5                                | 75.8 %        |
| 12 h        | 667.1     | 24.4                    | 38.5                                | 63.4 %        |
| 24 h        | 714.8     | 26.4                    | 38.5                                | 68.5 %        |
| 48 h        | 786.8     | 29.5                    | 38.5                                | 76.6 %        |

#### 4. Compound **10b** affects markers of liver injury and hepatic fibrosis in BDL rats

**Table S2.** Serum biochemical markers of BDL rats (n=8).

|                                    | Sham(n=8)   | BDL(n=8)                    | <b>10b</b><br>100mg·kg <sup>-1</sup> (n=7) |
|------------------------------------|-------------|-----------------------------|--------------------------------------------|
| Serum ALT (U·L <sup>-1</sup> )     | 27.75±3.86  | 102.38±41.49 <sup>##</sup>  | 84.83±18.11                                |
| Serum AST (U·L <sup>-1</sup> )     | 116±20.02   | 659.75±179.41 <sup>##</sup> | 435.5±98.62 <sup>*</sup>                   |
| Serum ALP (U·L <sup>-1</sup> )     | 178.5±54.74 | 371.00±41.17 <sup>##</sup>  | 391.33±52.42                               |
| Serum γ-GT (U·L <sup>-1</sup> )    | /           | 39.63±22.93 <sup>##</sup>   | 37.5±6.74                                  |
| Serum CHO (mmol·L <sup>-1</sup> )  | 1.57±0.16   | 2.55±0.44 <sup>##</sup>     | 2.08±0.43                                  |
| Serum LDL (mmol·L <sup>-1</sup> )  | 1.57±0.16   | 1.08±0.22 <sup>##</sup>     | 1.06±0.22                                  |
| Serum HDL (mmol·L <sup>-1</sup> )  | 0.65±0.08   | 0.47±0.12 <sup>##</sup>     | 0.29±0.06 <sup>**</sup>                    |
| Serum TG (mmol·L <sup>-1</sup> )   | 0.27±0.12   | 0.74±0.24 <sup>##</sup>     | 0.67±0.19                                  |
| Serum TBA (μmol·L <sup>-1</sup> )  | 8.53±2.65   | 228.45±31.99 <sup>##</sup>  | 202.60±30.80                               |
| Serum TBiL (μmol·L <sup>-1</sup> ) | 0.78±0.21   | 177.45±19.94 <sup>##</sup>  | 180.00±26.16                               |
| Bile TBA(μmol·L <sup>-1</sup> )    | /           | 258.46±69.07                | 249.4±103.67                               |
| Bile TBiL (μmol·L <sup>-1</sup> )  | /           | 5.63±1.51                   | 5.8±2.46                                   |
| Urine TBA(μmol·L <sup>-1</sup> )   | -0.53±1.62  | 24.75±20.07 <sup>##</sup>   | 15.38±5.76                                 |
| Urine TBiL (μmol·L <sup>-1</sup> ) | 2.93±4.72   | 6.65±4.09 <sup>##</sup>     | 5.33±1.50                                  |

## 5. Compound **10b** affects serum biochemical markers in HFD mice

**Table S3.** Serum biochemical markers of HFD mice (n=7)

|                                    | Ctrl (n=7)    | Model (n=7)                  | <b>10b</b><br>100mg·kg <sup>-1</sup> (n=7) |
|------------------------------------|---------------|------------------------------|--------------------------------------------|
| Serum ALT (U·L <sup>-1</sup> )     | 32.63±30.61   | 258.33±43.36 <sup>##</sup>   | 325.43±88.40                               |
| Serum AST (U·L <sup>-1</sup> )     | 114.88±32.21  | 326.83±43.41 <sup>##</sup>   | 401.86±91.05                               |
| Serum ALP (U·L <sup>-1</sup> )     | 59.00±8.30    | 128.83±9.50 <sup>##</sup>    | 189.71±29.41                               |
| Serum LDH (U·L <sup>-1</sup> )     | 474.00±188.43 | 1563.67±245.77 <sup>##</sup> | 1326.57±264.54                             |
| Serum CHO (mmol·L <sup>-1</sup> )  | 2.79±0.32     | 2.13±0.42 <sup>##</sup>      | 2.36±0.44                                  |
| Serum LDL (mmol·L <sup>-1</sup> )  | 0.14±0.02     | 0.33±0.13 <sup>##</sup>      | 0.23±0.04                                  |
| Serum HDL (mmol·L <sup>-1</sup> )  | 1.89±0.32     | 1.03±0.20 <sup>##</sup>      | 1.22±0.33                                  |
| Serum TG (mmol·L <sup>-1</sup> )   | 1.24±0.25     | 1.08±0.18                    | 0.85±0.30                                  |
| Serum Glu (mmol·L <sup>-1</sup> )  | 8.72±0.94     | 3.80±1.37 <sup>##</sup>      | 5.71±1.25                                  |
| Serum TBA (μmol·L <sup>-1</sup> )  | 1.34±0.57     | 25.72±4.10 <sup>##</sup>     | 23.46±12.81                                |
| Serum TBiL (μmol·L <sup>-1</sup> ) | 1.48±1.21     | 3.80±1.13 <sup>##</sup>      | 3.81±0.92                                  |

Values are presented as the mean ± SD (n=7); <sup>##</sup> *p*<0.01, significantly different from the sham group.

## 6. Binding model of 12β-OA derivative interacting with FXR-LBD

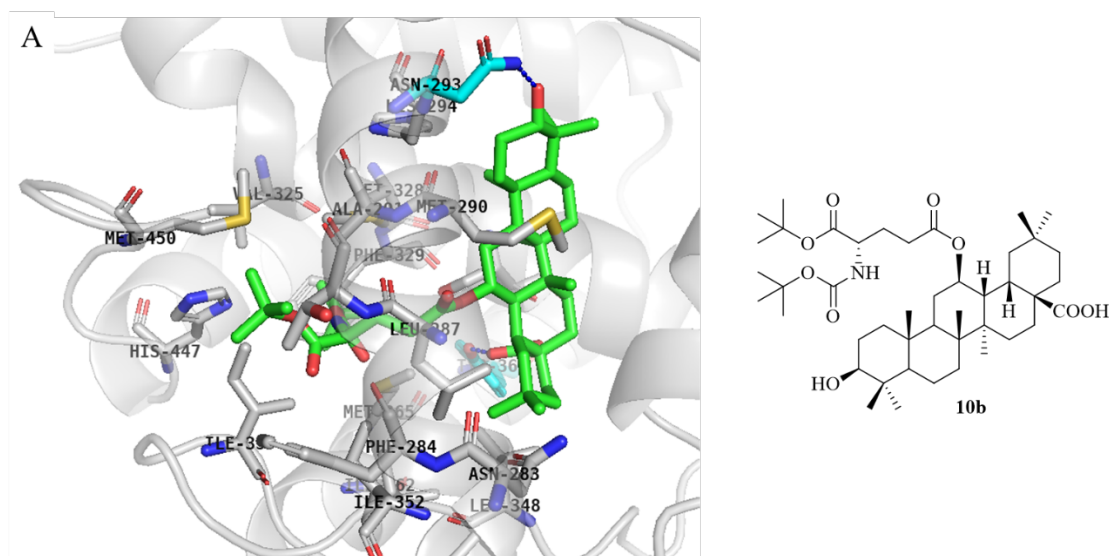

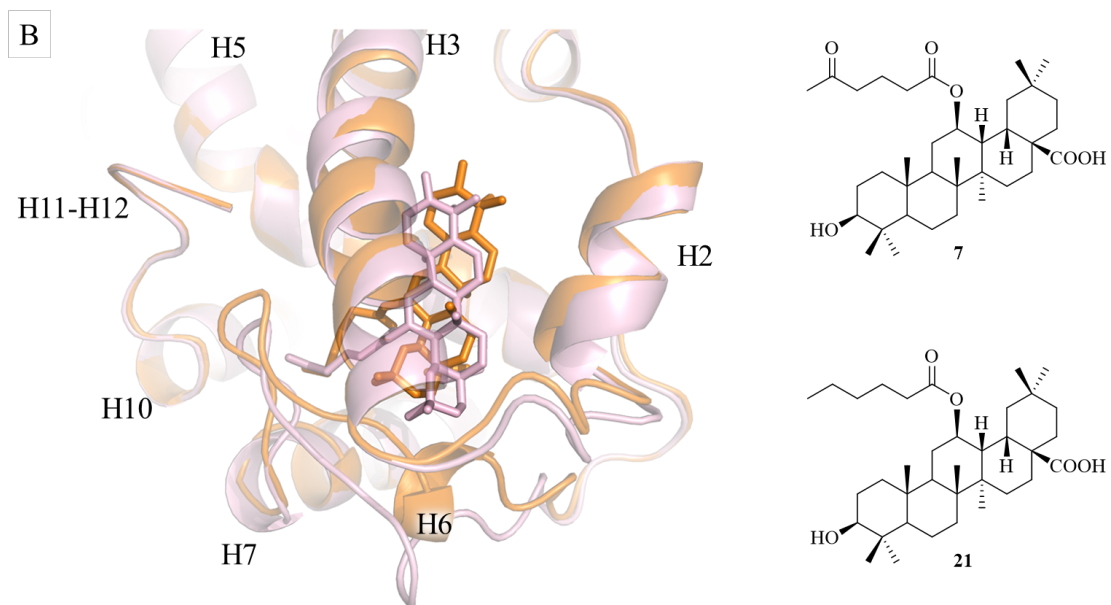

**Fig. S2.** (A) Binding model of compound **10b** (green) as ligand interacting with FXR-LBD. (B) Binding model of compound **7** (pink) and **21** (orange) as ligands interacting with FXR-LBD.

## 7. NMR and HRMS spectra of all compounds

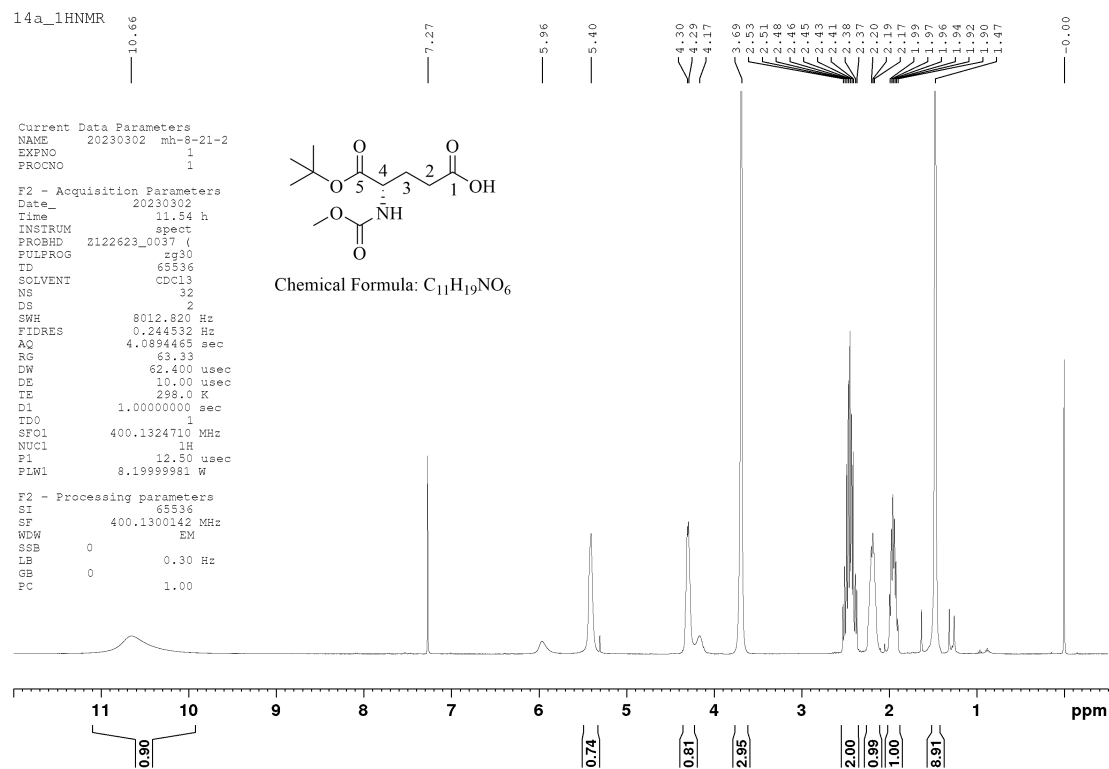

Fig. S3. <sup>1</sup>H NMR of intermediate 14a

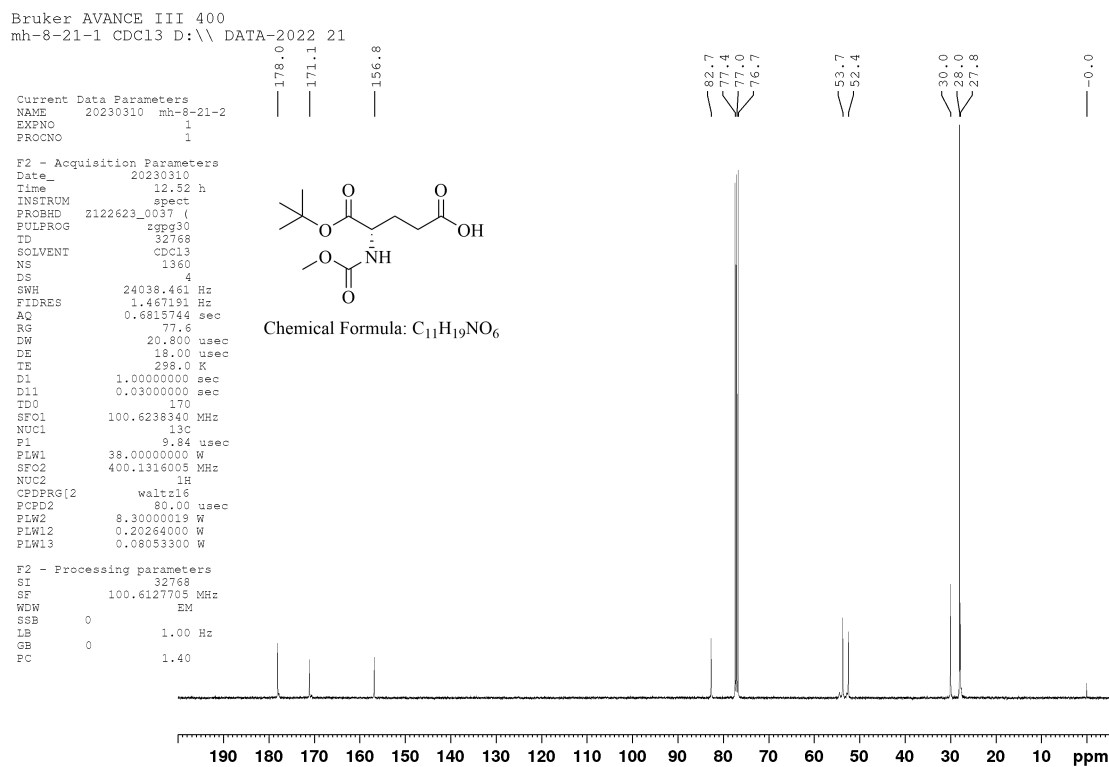

Fig. S4. <sup>13</sup>C NMR of intermediate 14a

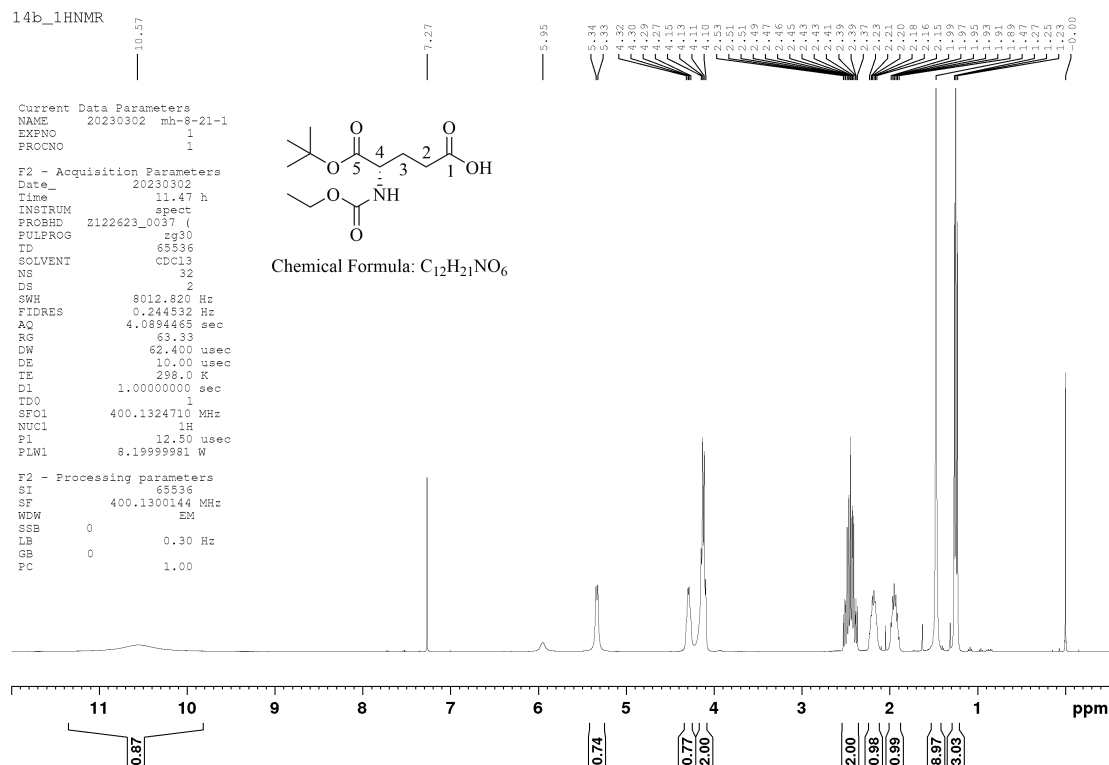

Fig. S5. <sup>1</sup>H NMR of intermediate 14b

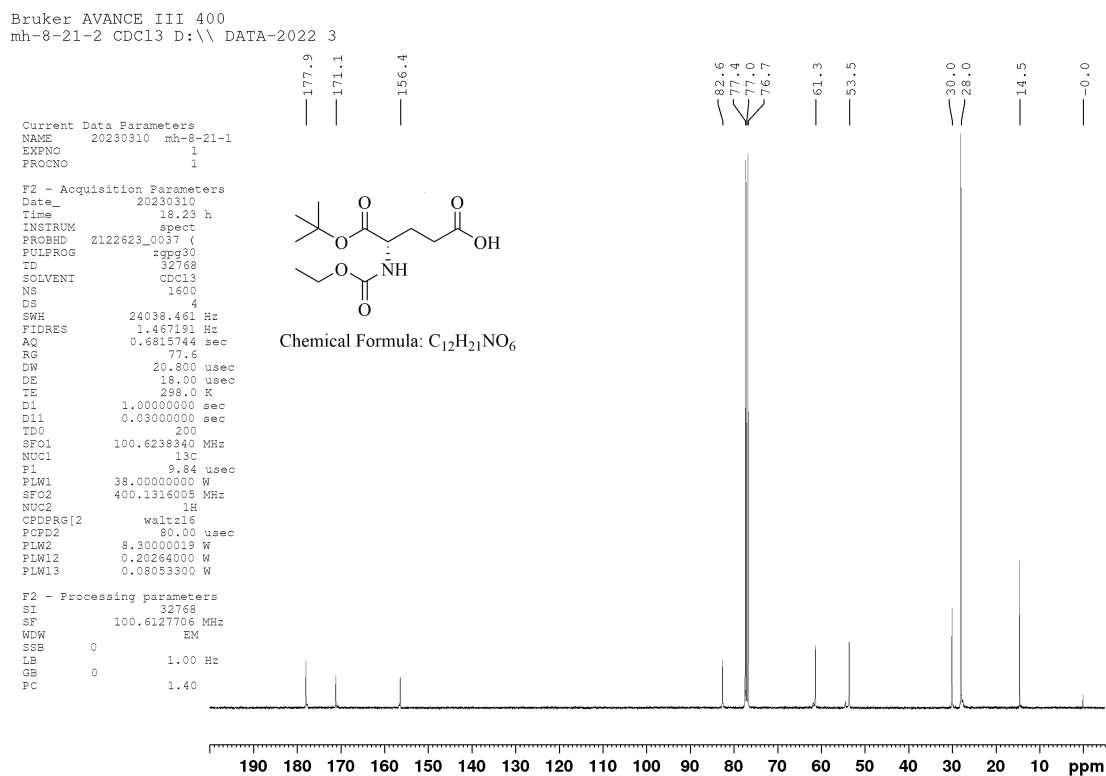

Fig. S6. <sup>13</sup>C NMR of intermediate 14b

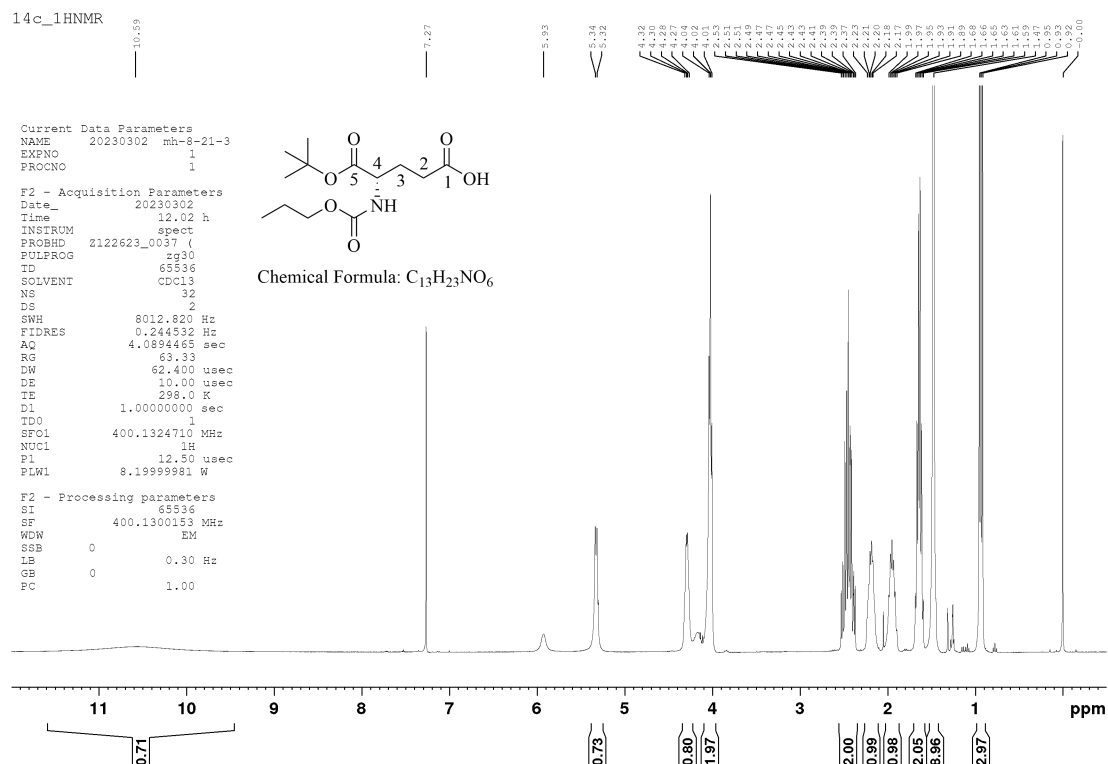

Fig. S7. <sup>1</sup>H NMR of intermediate 14c

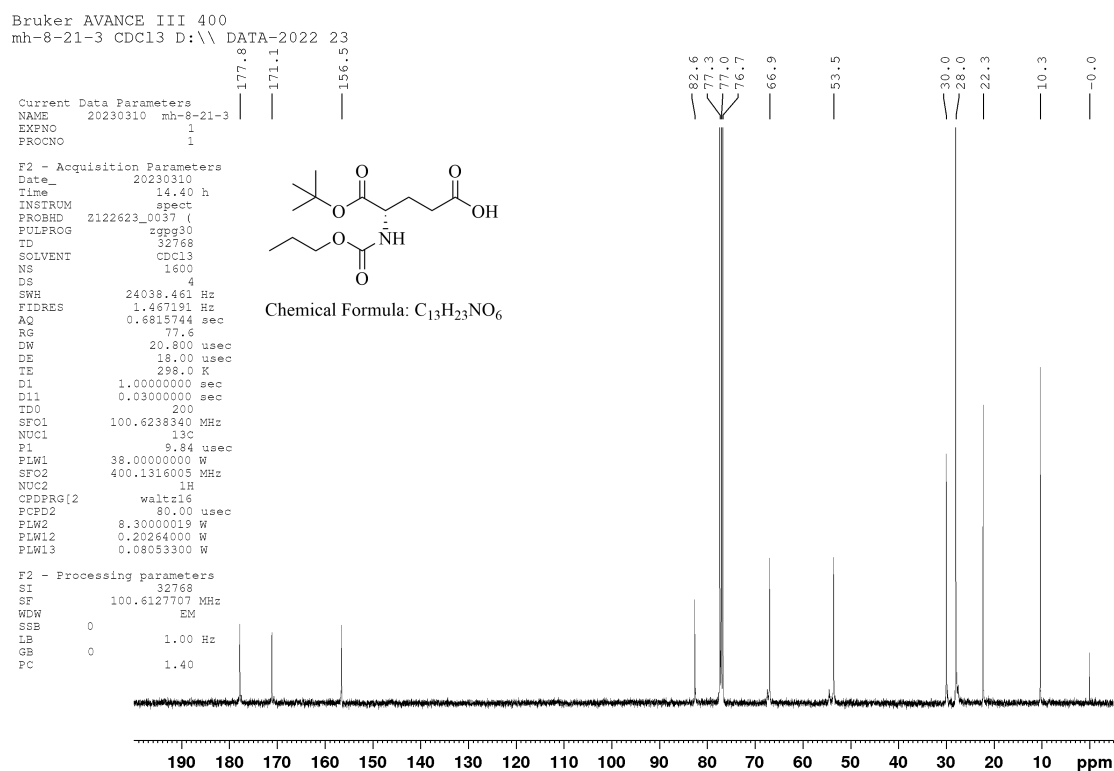

Fig. S8. <sup>13</sup>C NMR of intermediate 14c

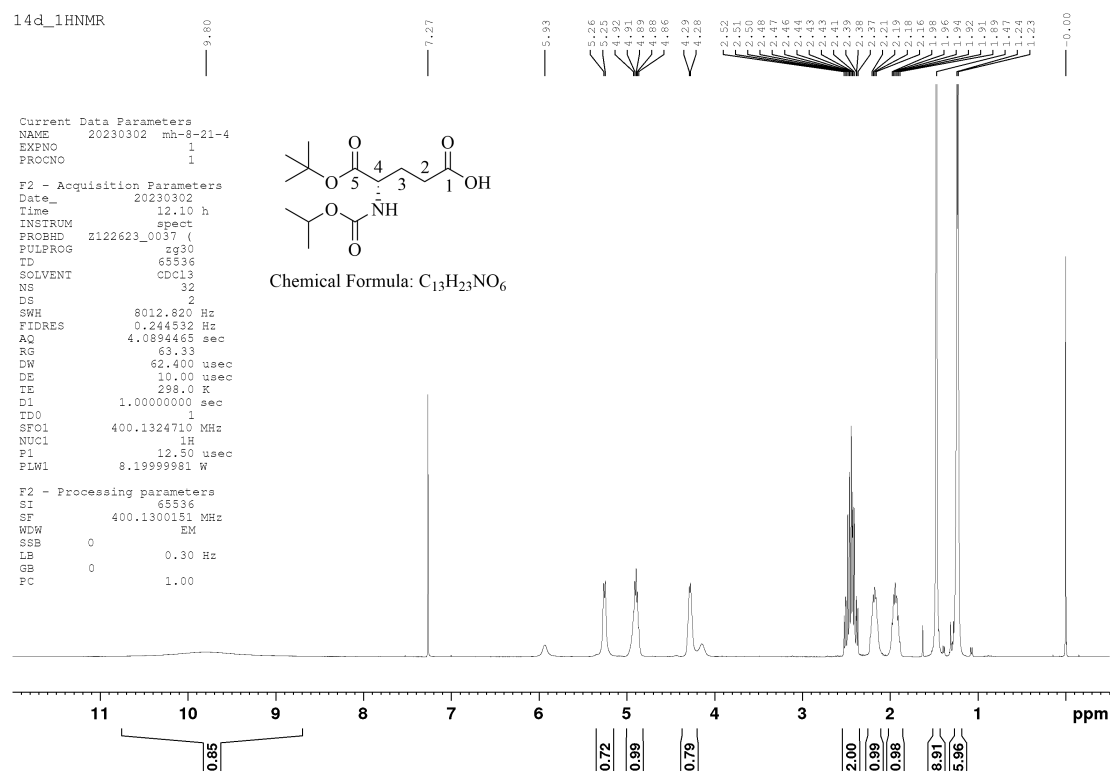

Fig. S9. <sup>1</sup>H NMR of intermediate 14d

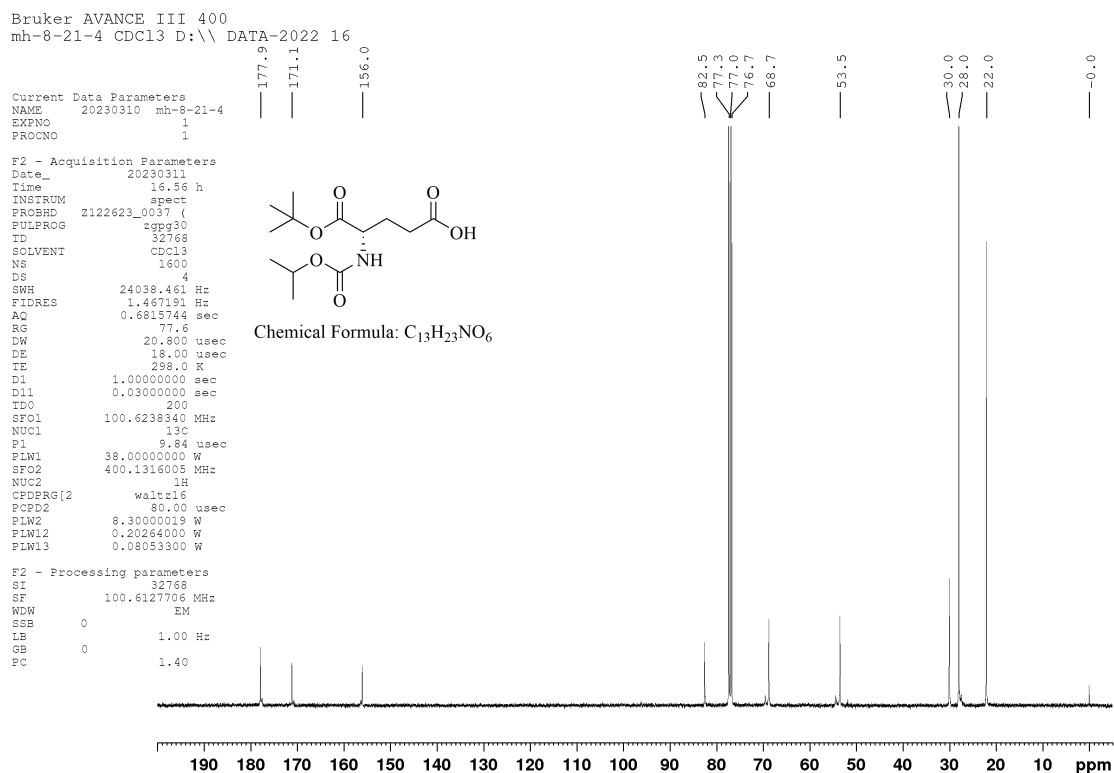

Fig. S10. <sup>13</sup>C NMR of intermediate 14d

14e\_1HNMR

Current Data Parameters  
NAME 20230302 mh-8-21-5  
EXPNO 1  
PROCNO 1

F2 - Acquisition Parameters  
Date\_ 20230302  
Time 12.18 h  
INSTRUM spect  
PROBHD Z122623\_0037 (  
PULPROG zg30  
TD 65536  
SOLVENT CDCl3  
NS 32  
DS 2  
SWH 8012.820 Hz  
FIDRES 0.244532 Hz  
AQ 4.0894465 sec  
RG 63.33  
DM 62.400 usec  
DE 10.00 usec  
TE 298.0 K  
D1 1.00000000 sec  
TD0 1  
SFO1 400.1324710 MHz  
NUC1 1H  
P1 12.50 usec  
PLW1 8.19999981 W

F2 - Processing parameters  
SI 65536  
SF 400.1300148 MHz  
WDW EM  
SSB 0  
LB 0.30 Hz  
GB 0  
PC 1.00

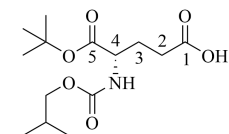

Chemical Formula: C<sub>14</sub>H<sub>25</sub>NO<sub>6</sub>

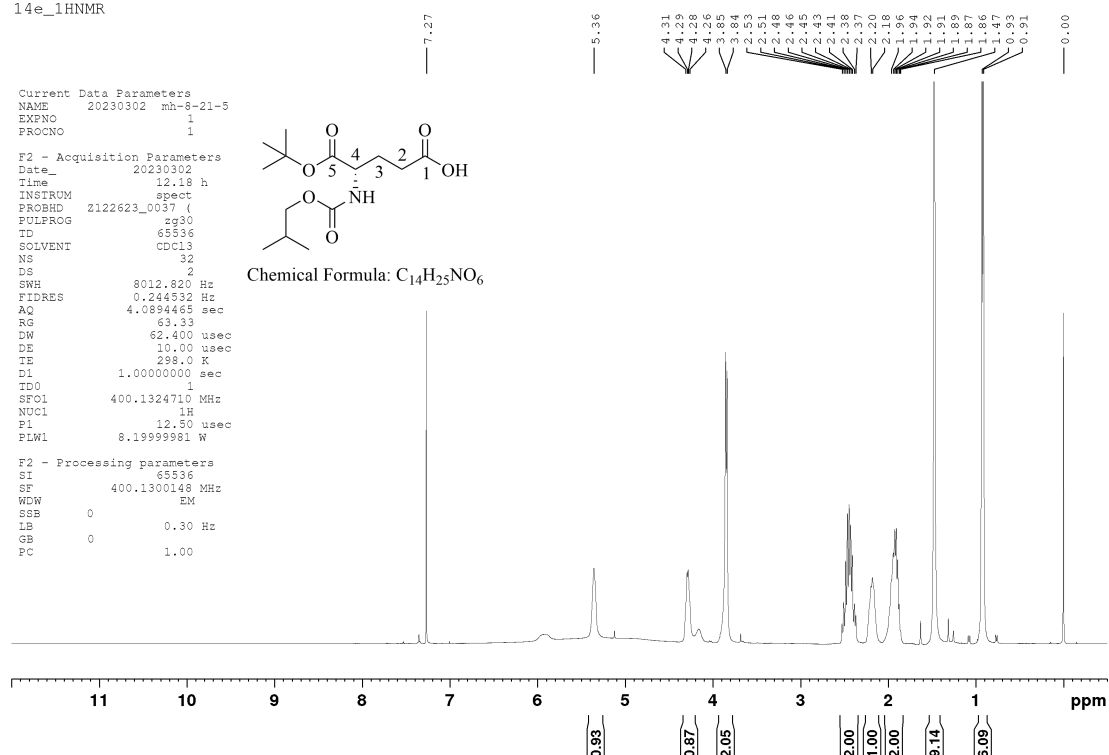

Fig. S11. <sup>1</sup>H NMR of intermediate 14e

Bruker AVANCE III 400  
mh-8-21-5 CDCl3 D:\ DATA-2022 22

Current Data Parameters  
NAME 20230310 mh-8-21-5  
EXPNO 1  
PROCNO 1

F2 - Acquisition Parameters  
Date\_ 20230310  
Time 13.47 h  
INSTRUM spect  
PROBHD Z122623\_0037 (  
PULPROG zgpg30  
TD 32768  
SOLVENT CDCl3  
NS 1436  
DS 4  
SWH 24038.461 Hz  
FIDRES 1.467191 Hz  
AQ 0.6819744 sec  
RG 77.6  
DM 20.800 usec  
DE 18.00 usec  
TE 298.0 K  
D1 1.00000000 sec  
D11 0.03000000 sec  
TD0 200  
SFO1 100.6238340 MHz  
NUC1 13C  
P1 9.84 usec  
PLW1 38.00000000 W  
SFO2 400.1316005 MHz  
NUC2 1H  
CPDPRG2 waltz16  
PCPD2 80.00 usec  
PLW2 8.30000019 W  
PLW12 0.20264000 W  
PLW13 0.08053300 W

F2 - Processing parameters  
SI 32768  
SF 100.6127706 MHz  
WDW EM  
SSB 0  
LB 1.00 Hz  
GB 0  
PC 1.40

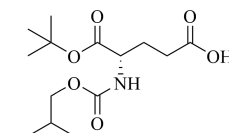

Chemical Formula: C<sub>14</sub>H<sub>25</sub>NO<sub>6</sub>

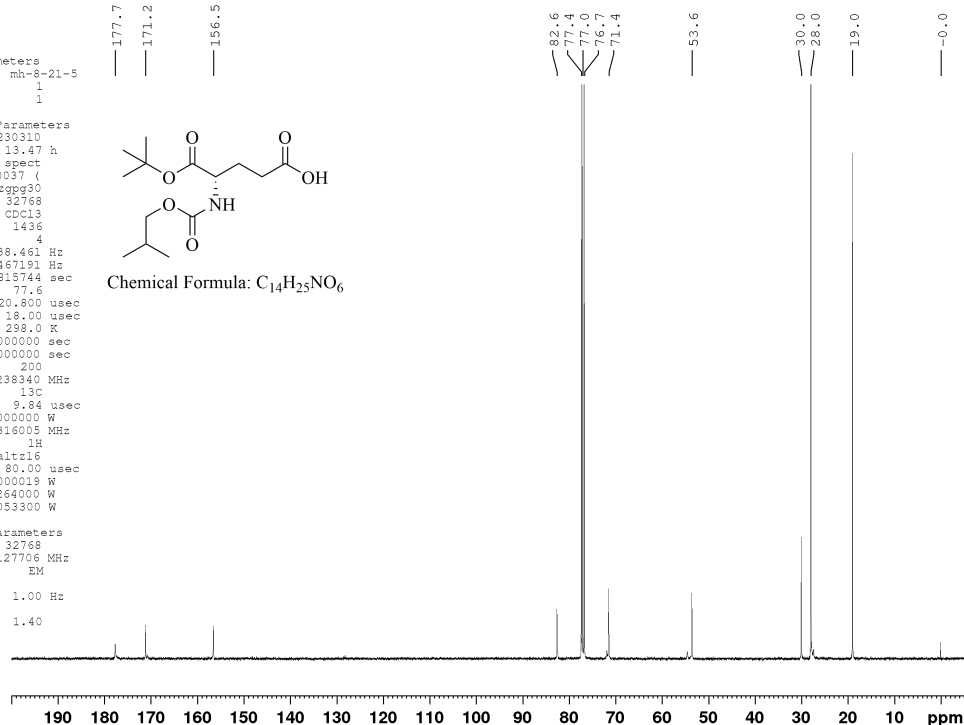

Fig. S12. <sup>13</sup>C NMR of intermediate 14e

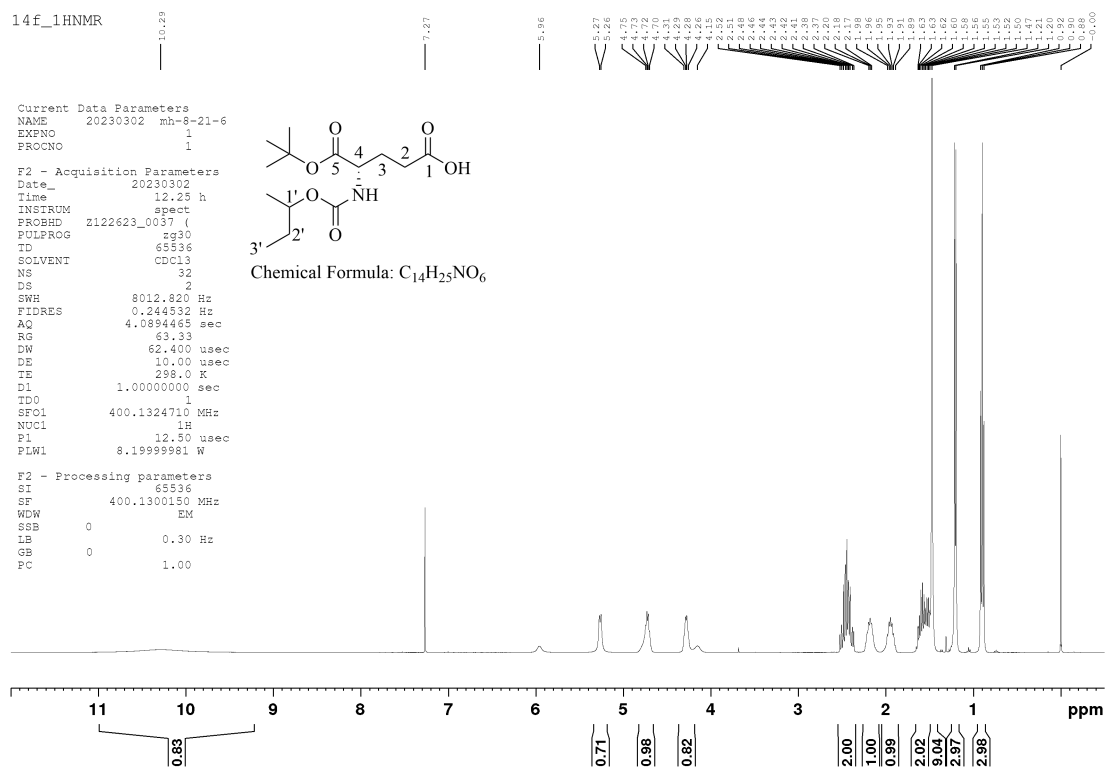

Fig. S13. <sup>1</sup>H NMR of intermediate 14f

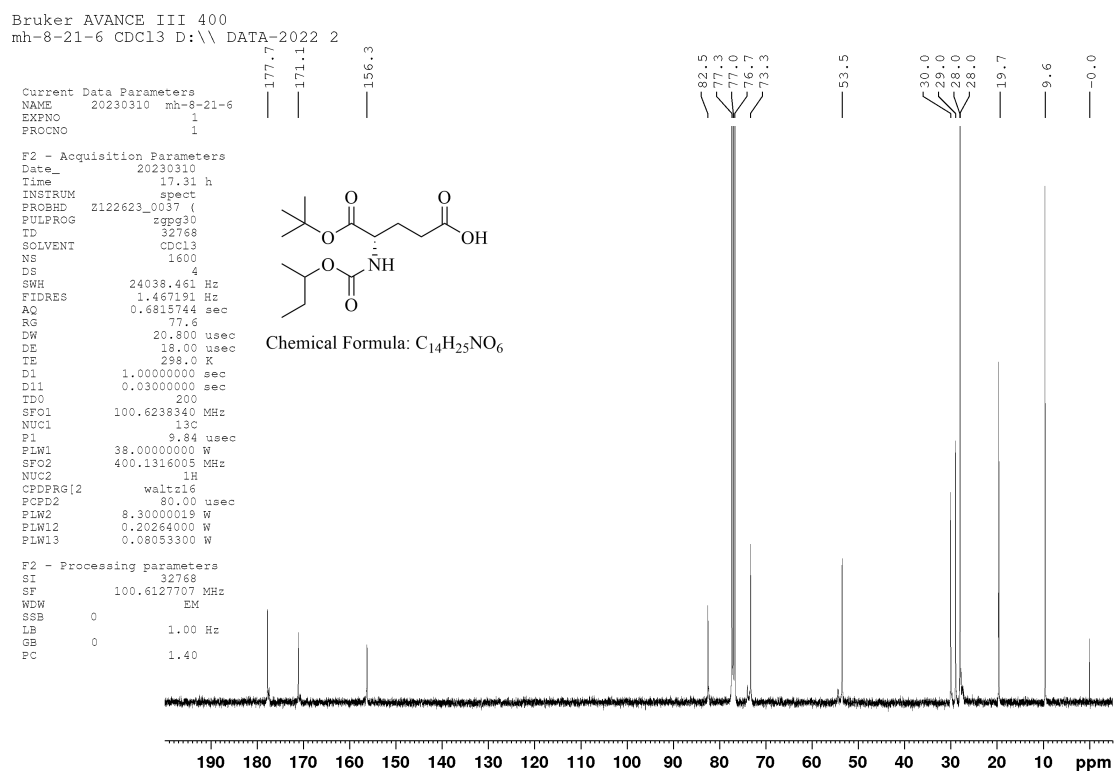

Fig. S14. <sup>13</sup>C NMR of intermediate 14f

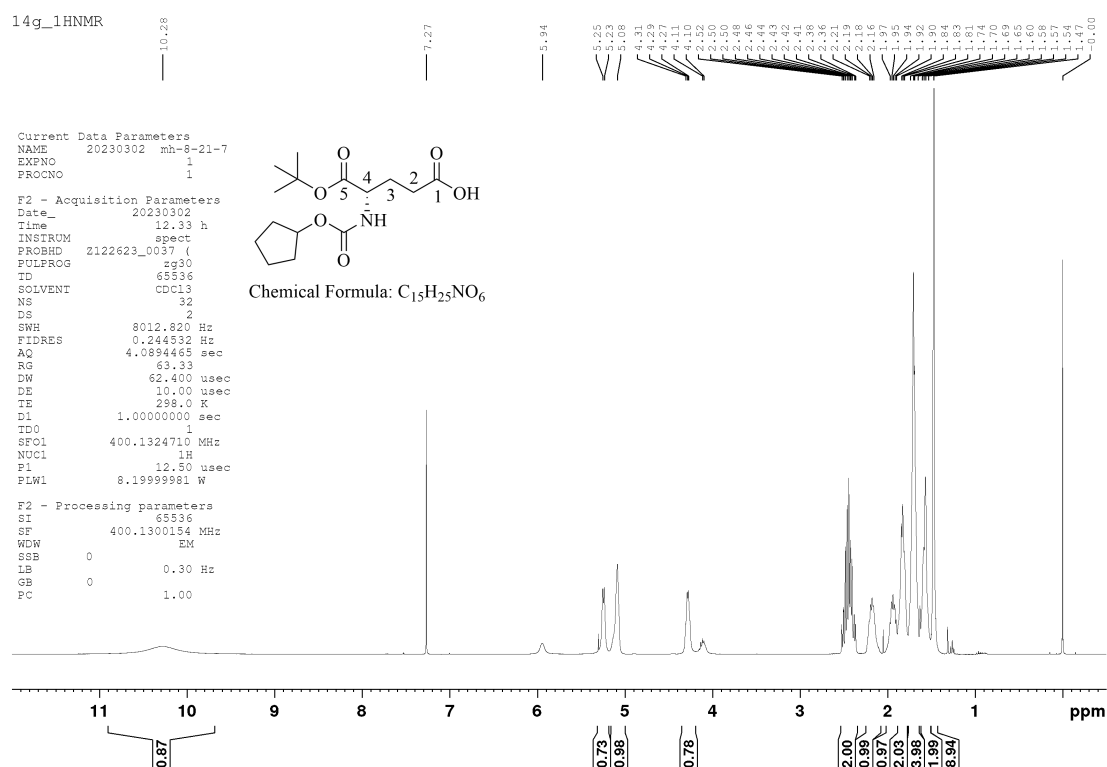

Fig. S15. <sup>1</sup>H NMR of intermediate 14g

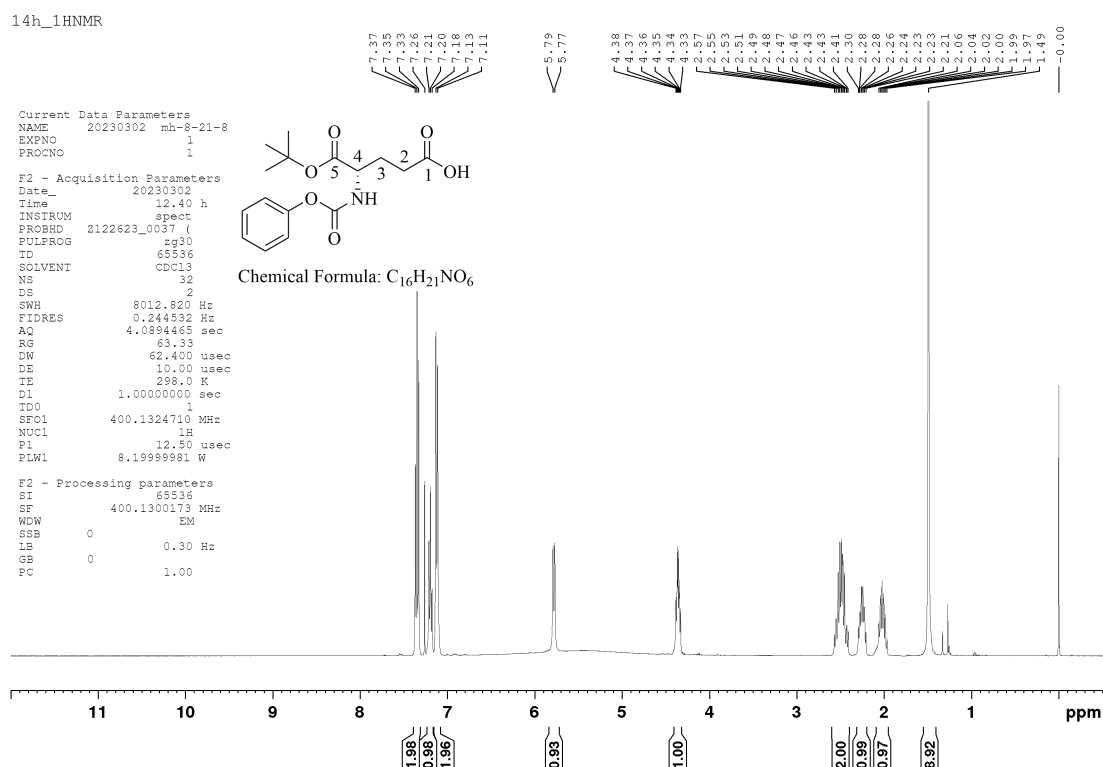

Fig. S16. <sup>1</sup>H NMR of intermediate 14h

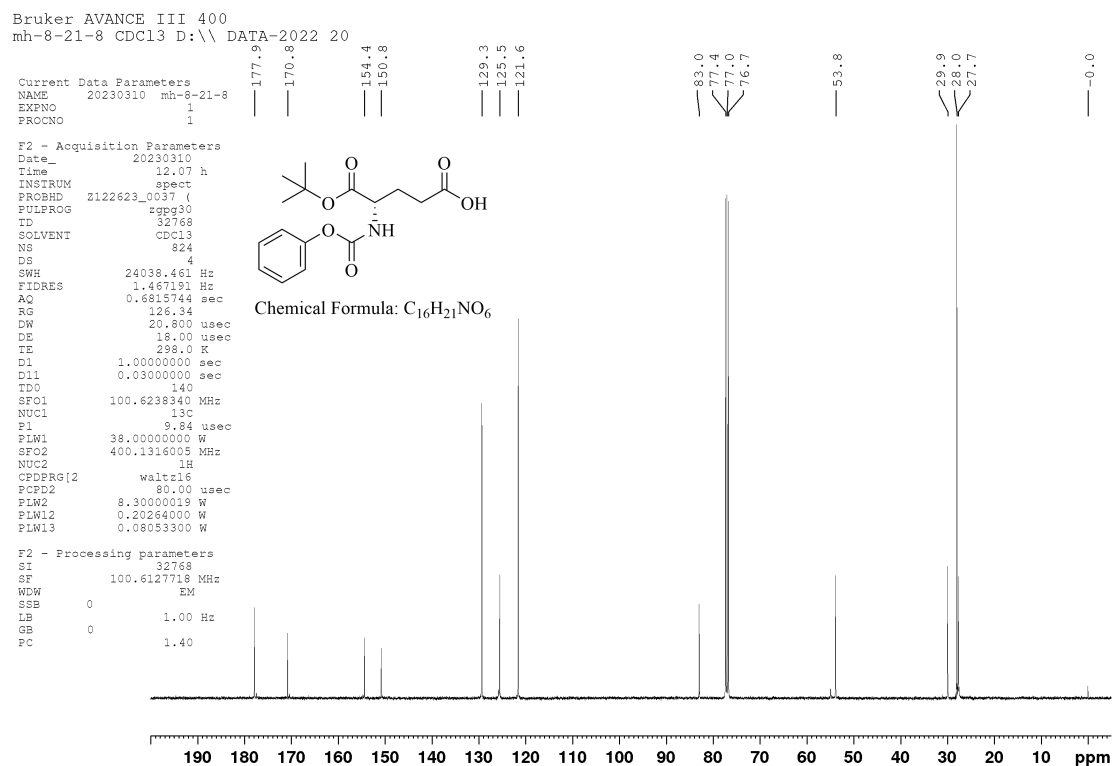

Fig. S17. <sup>13</sup>C NMR of intermediate 14h

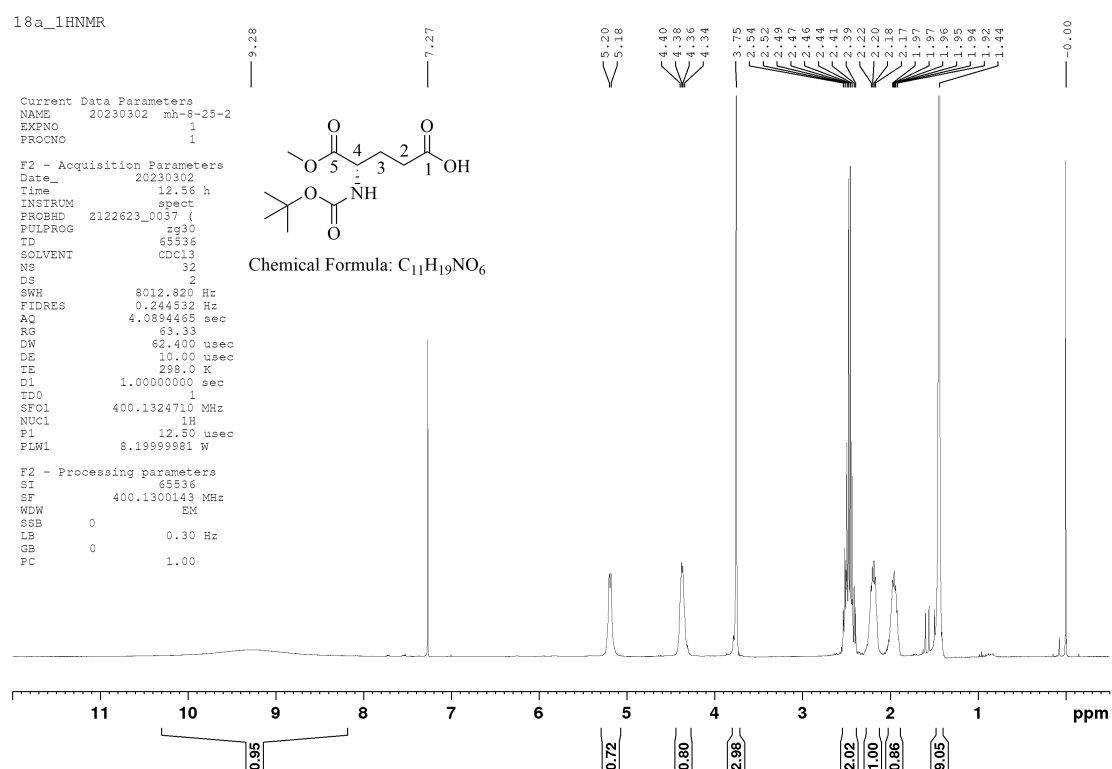

Fig. S18. <sup>1</sup>H NMR of intermediate 18a

18b\_1HNMR

Current Data Parameters  
 NAME 20230302 mh-8-25-1  
 EXPNO 1  
 PROCNO 1

F2 - Acquisition Parameters  
 Date\_ 20230302  
 Time 12.48 h  
 INSTRUM spect  
 PROBHD Z122623\_0037 (   
 PULPROG zg30  
 ID 65536  
 SOLVENT CDCl3  
 NS 32  
 DS 2  
 SWH 8012.820 Hz  
 FIDRES 0.244532 Hz  
 AQ 4.0894465 sec  
 RG 37.01  
 DW 62.400 usec  
 DE 10.00 usec  
 TE 298.0 K  
 D1 1.00000000 sec  
 TD0 1  
 SFO1 400.1324710 MHz  
 NUC1 1H  
 P1 12.50 usec  
 PLW1 8.19999981 W

F2 - Processing parameters  
 SI 65536  
 SF 400.1300118 MHz  
 WDW EM  
 SSB 0  
 LB 0.30 Hz  
 GB 0  
 PC 1.00

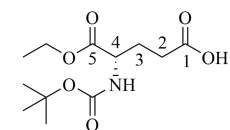Chemical Formula: C<sub>12</sub>H<sub>21</sub>NO<sub>6</sub>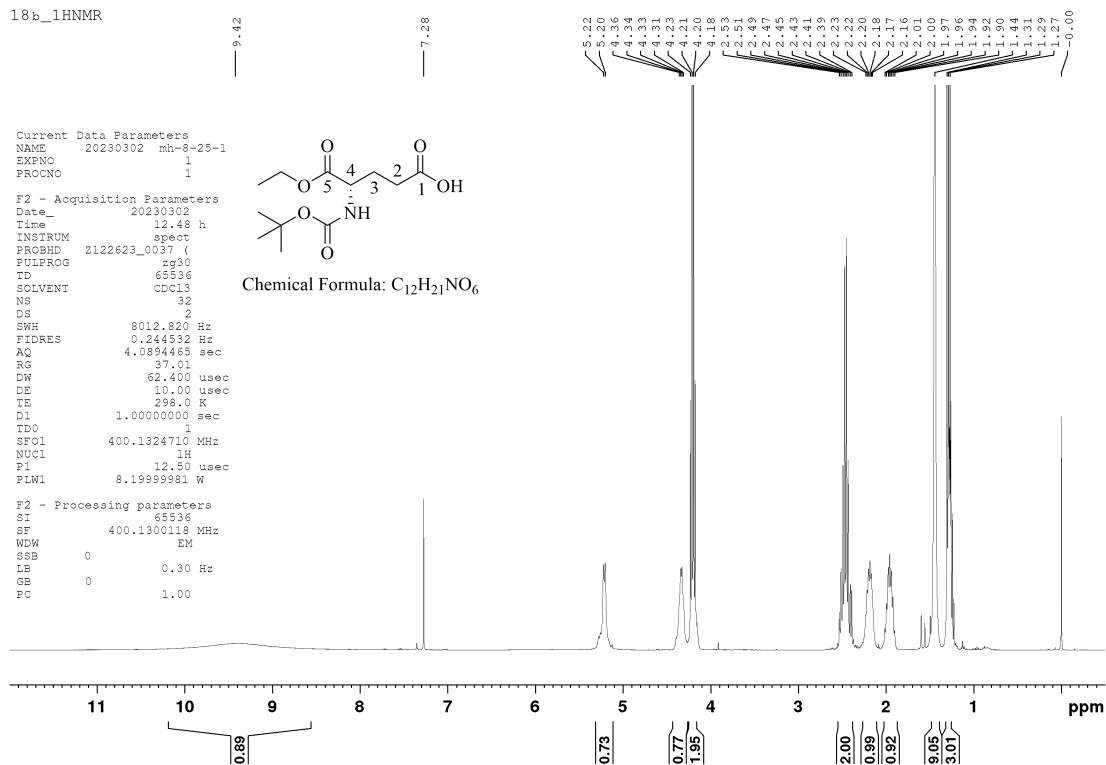Fig. S19. <sup>1</sup>H NMR of intermediate 18b

18c\_1HNMR

Current Data Parameters  
 NAME 20230302 mh-8-25-3  
 EXPNO 1  
 PROCNO 1

F2 - Acquisition Parameters  
 Date\_ 20230302  
 Time 13.03 h  
 INSTRUM spect  
 PROBHD Z122623\_0037 (   
 PULPROG zg30  
 ID 65536  
 SOLVENT CDCl3  
 NS 32  
 DS 2  
 SWH 8012.820 Hz  
 FIDRES 0.244532 Hz  
 AQ 4.0894465 sec  
 RG 63.33  
 DW 62.400 usec  
 DE 10.00 usec  
 TE 298.0 K  
 D1 1.00000000 sec  
 TD0 1  
 SFO1 400.1324710 MHz  
 NUC1 1H  
 P1 12.50 usec  
 PLW1 8.19999981 W

F2 - Processing parameters  
 SI 65536  
 SF 400.1300145 MHz  
 WDW EM  
 SSB 0  
 LB 0.30 Hz  
 GB 0  
 PC 1.00

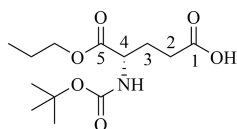Chemical Formula: C<sub>13</sub>H<sub>23</sub>NO<sub>6</sub>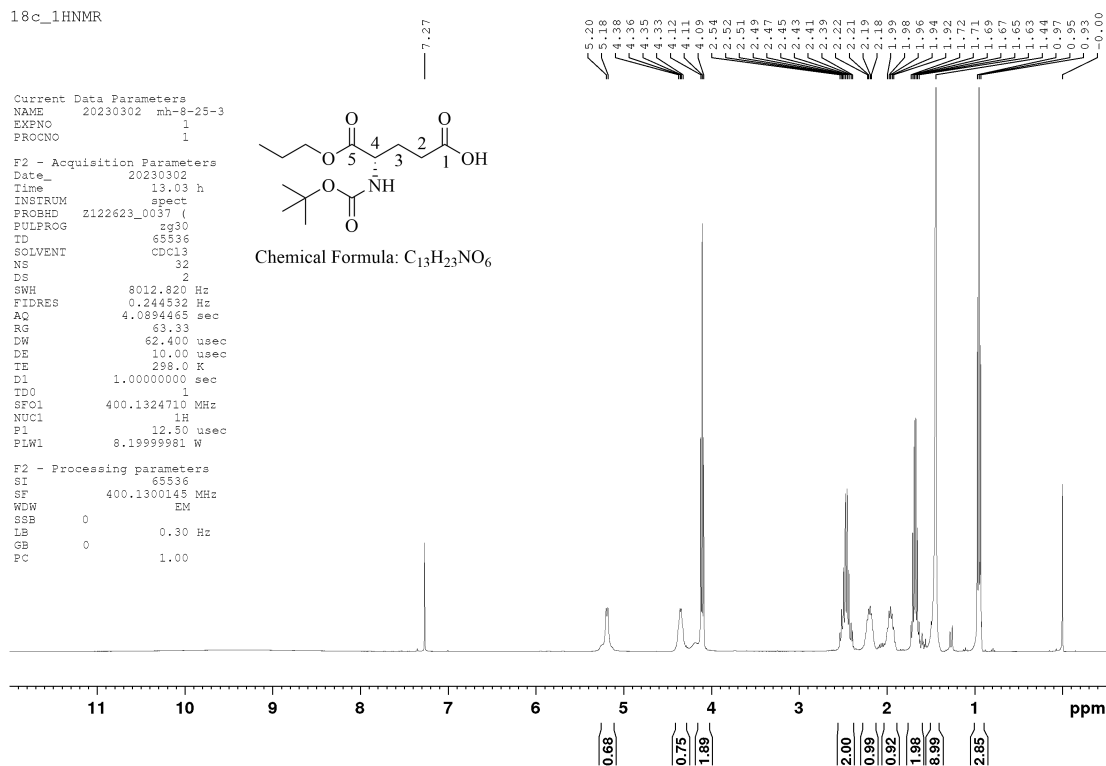Fig. S20. <sup>1</sup>H NMR of intermediate 18c

18d\_1HNMR

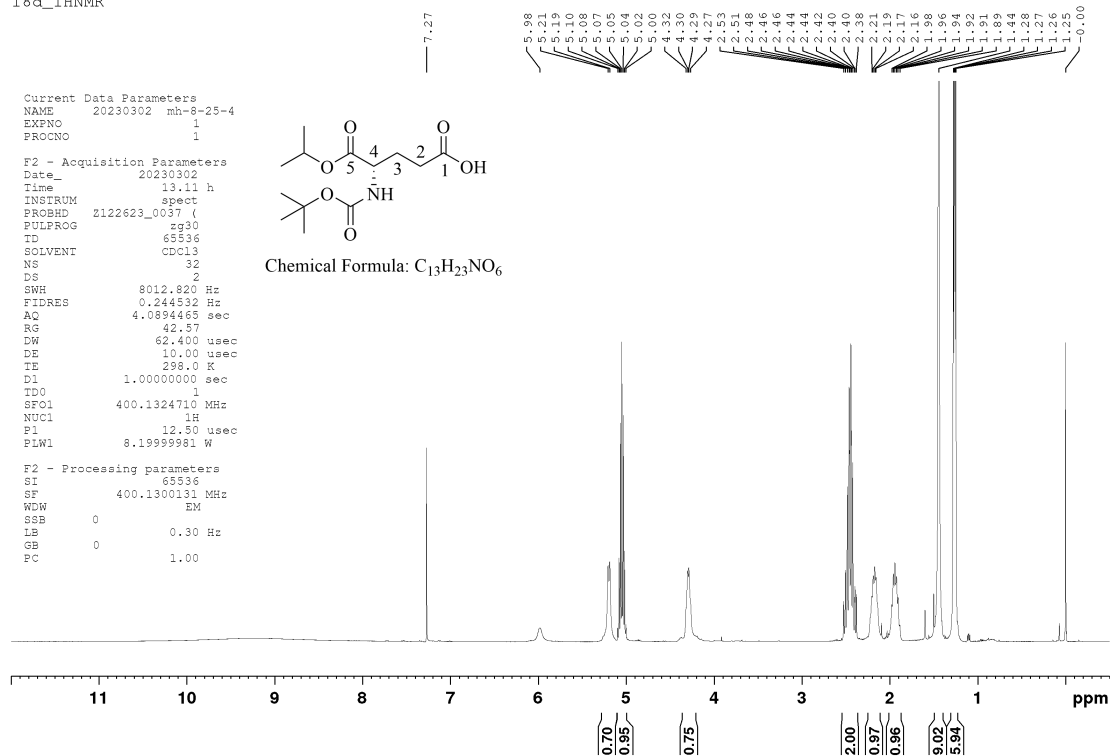

Fig. S21.  $^1H$  NMR of intermediate 18d

18e\_1HNMR

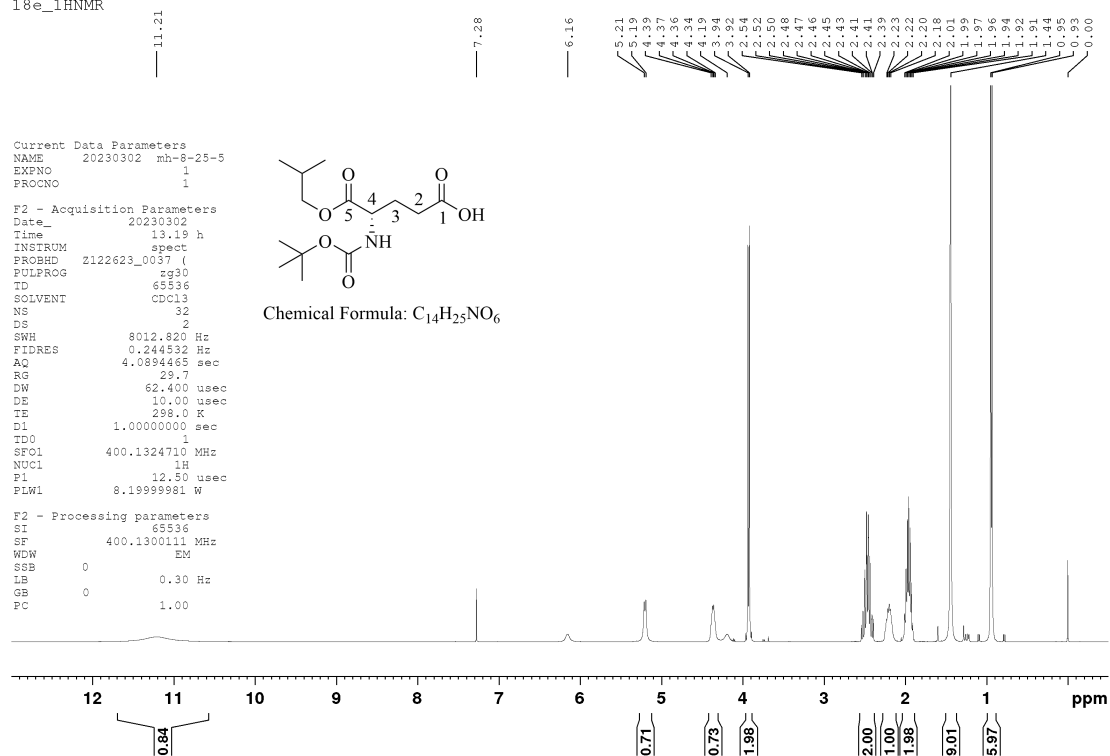

Fig. S22.  $^1H$  NMR of intermediate 18e

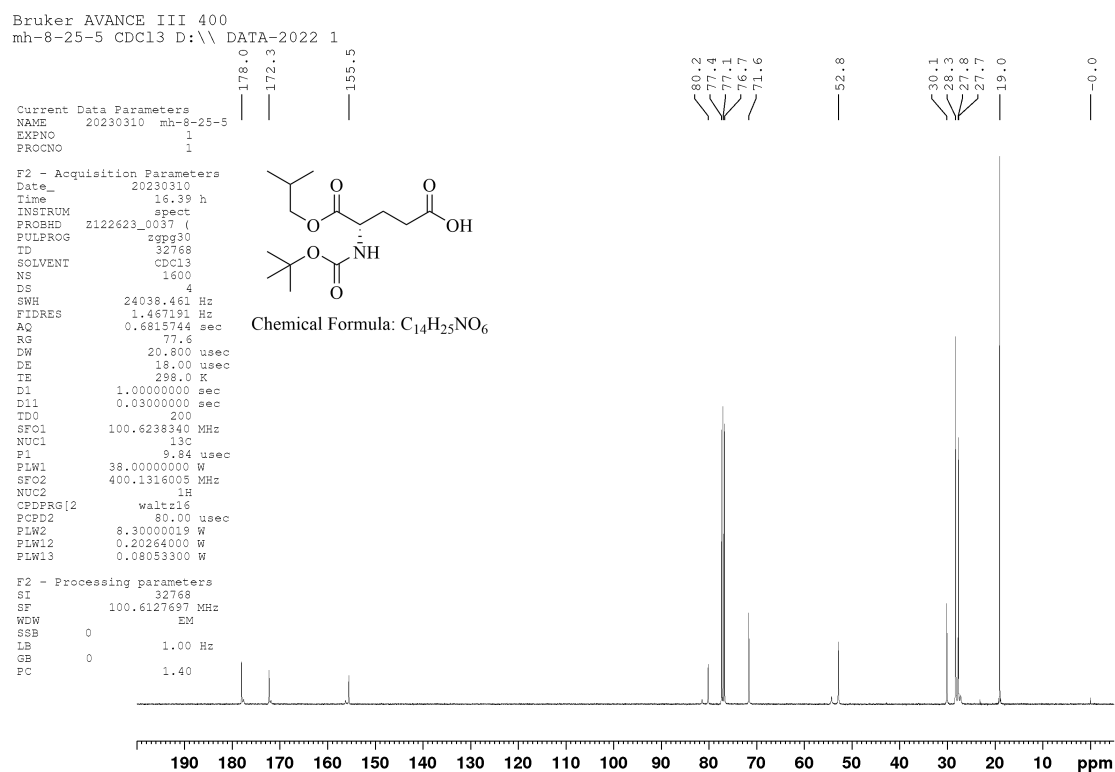

Fig. S23. <sup>13</sup>C NMR of intermediate 18e

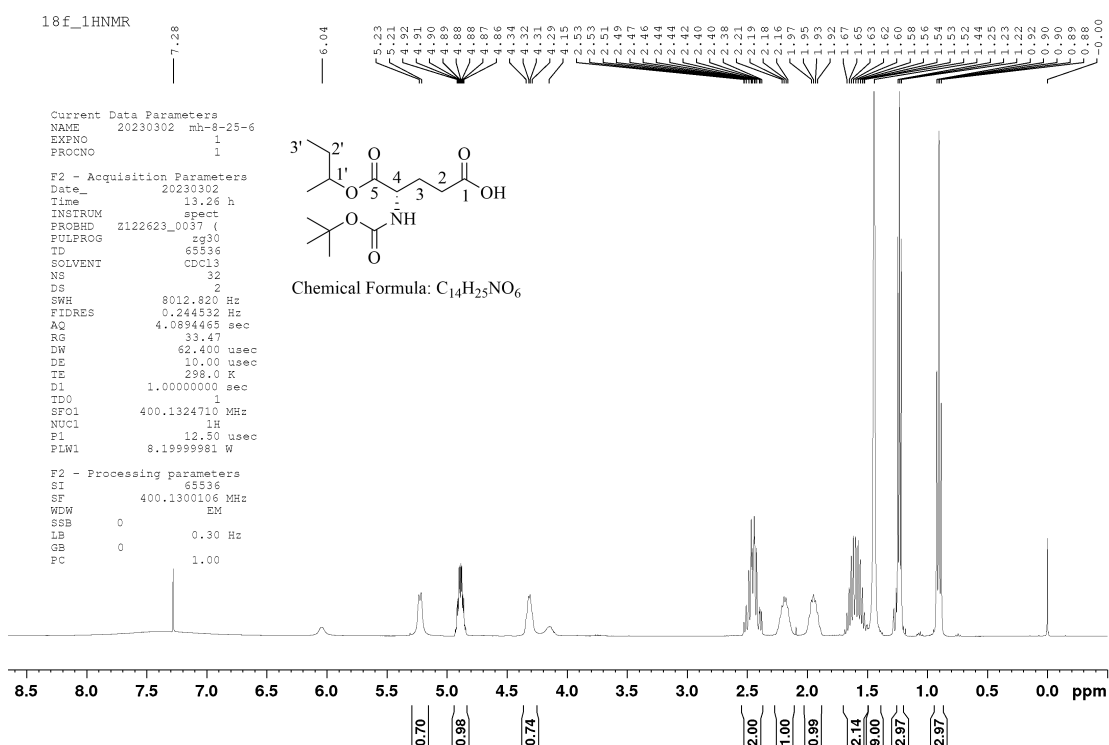

Fig. S24. <sup>1</sup>H NMR of intermediate 18f

Bruker AVANCE III 400  
mh-8-25-6 CDCl3 D:\ DATA-2022 24

Current Data Parameters  
NAME 20230310 mh-8-25-6  
EXPNO 1  
PROCNO 1

F2 - Acquisition Parameters  
Date\_ 20230310  
Time 15.47 h  
INSTRUM spect  
PROBHD Z122623\_0037 (   
PULPROG zgpg30  
TD 32768  
SOLVENT CDCl3  
NS 1600  
DS 4  
SWH 24038.461 Hz  
FIDRES 1.467191 Hz  
AQ 0.6815744 sec  
RG 77.6  
DW 20.800 usec  
DE 18.00 usec  
TE 298.0 K  
D1 1.00000000 sec  
D11 0.03000000 sec  
TD0 200  
SFO1 100.6238340 MHz  
NUC1 13C  
P1 9.84 usec  
PLW1 38.00000000 W  
SFO2 400.1316005 MHz  
NUC2 1H  
CPDPRG2 waltr16  
PCPD2 80.00 usec  
PLW2 8.30000019 W  
PLW12 0.20264000 W  
PLW13 0.08053300 W

F2 - Processing parameters  
SI 32768  
SF 100.6127691 MHz  
WDW EM  
SSB 0  
LB 1.00 Hz  
GB 0  
PC 1.40

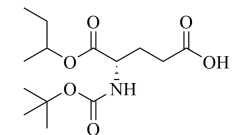

Chemical Formula: C<sub>14</sub>H<sub>25</sub>NO<sub>6</sub>

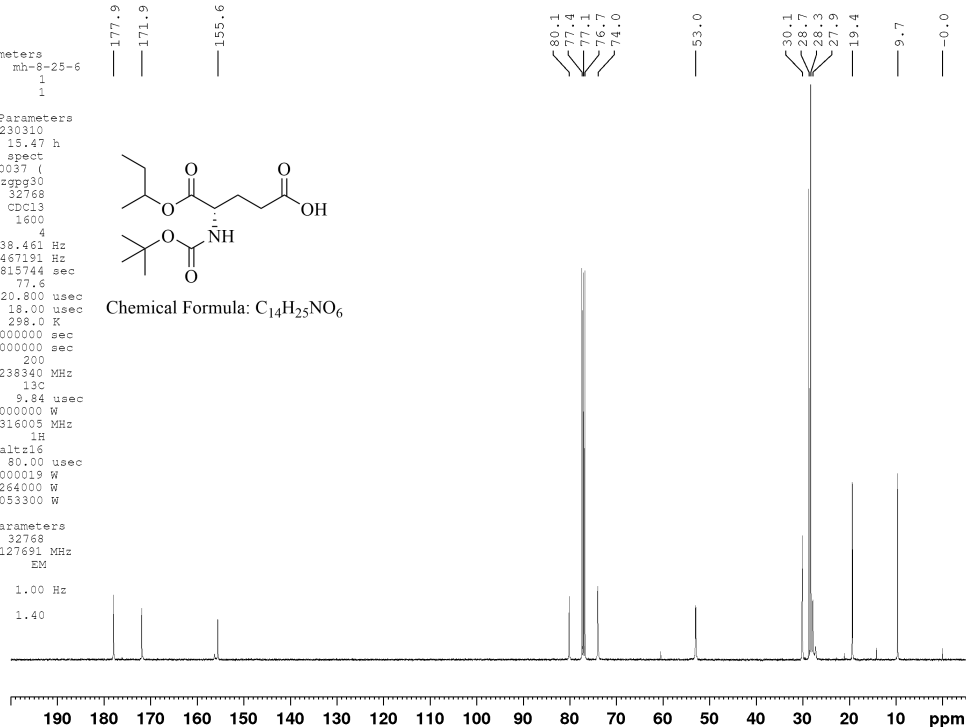

Fig. S25. <sup>13</sup>C NMR of intermediate **18f**

18g\_1HNMR

Current Data Parameters  
NAME 20230302 mh-8-25-7  
EXPNO 1  
PROCNO 1

F2 - Acquisition Parameters  
Date\_ 20230302  
Time 13.34 h  
INSTRUM spect  
PROBHD Z122623\_0037 (   
PULPROG zg30  
TD 65536  
SOLVENT CDCl3  
NS 32  
DS 2  
SWH 8012.820 Hz  
FIDRES 0.244532 Hz  
AQ 4.0894465 sec  
RG 42.57  
DW 62.400 usec  
DE 10.00 usec  
TE 298.0 K  
D1 1.00000000 sec  
D11 1  
TD0 400.1324710 MHz  
SFO1 1H  
NUC1 1H  
P1 12.50 usec  
PLW1 8.19999981 W

F2 - Processing parameters  
SI 65536  
SF 400.1300129 MHz  
WDW EM  
SSB 0  
LB 0.30 Hz  
GB 0  
PC 1.00

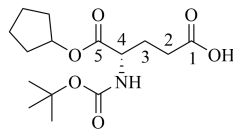

Chemical Formula: C<sub>15</sub>H<sub>25</sub>NO<sub>6</sub>

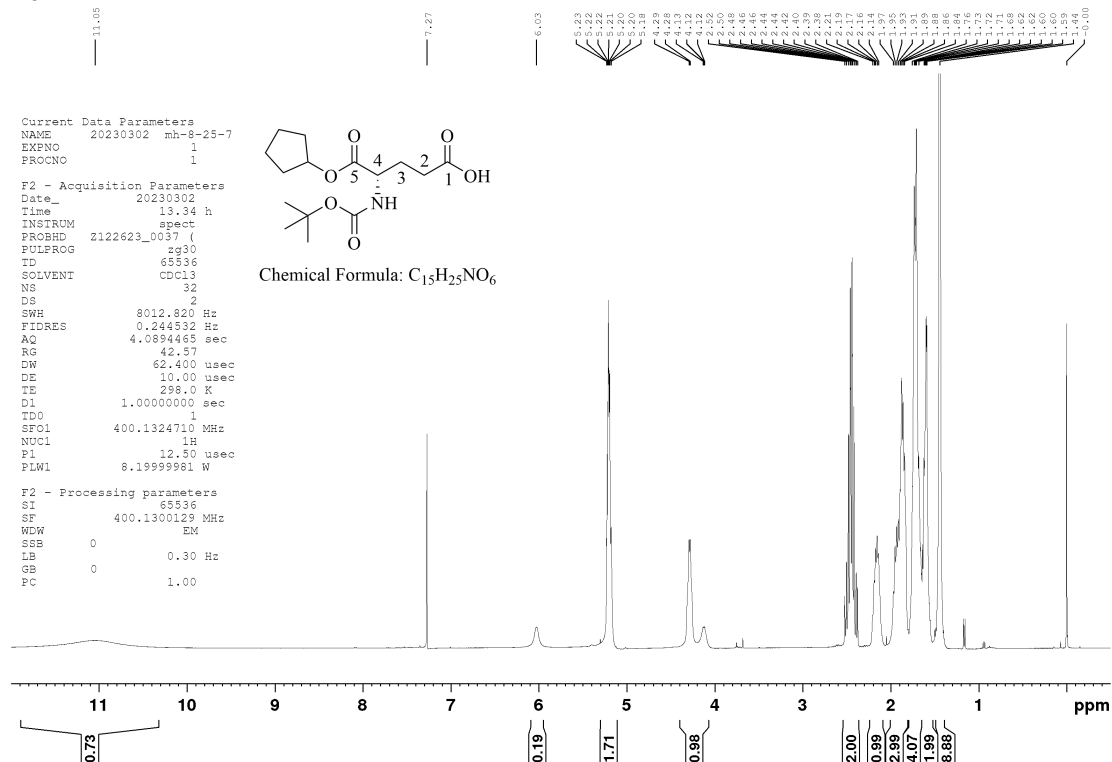

Fig. S26. <sup>1</sup>H NMR of intermediate **18g**

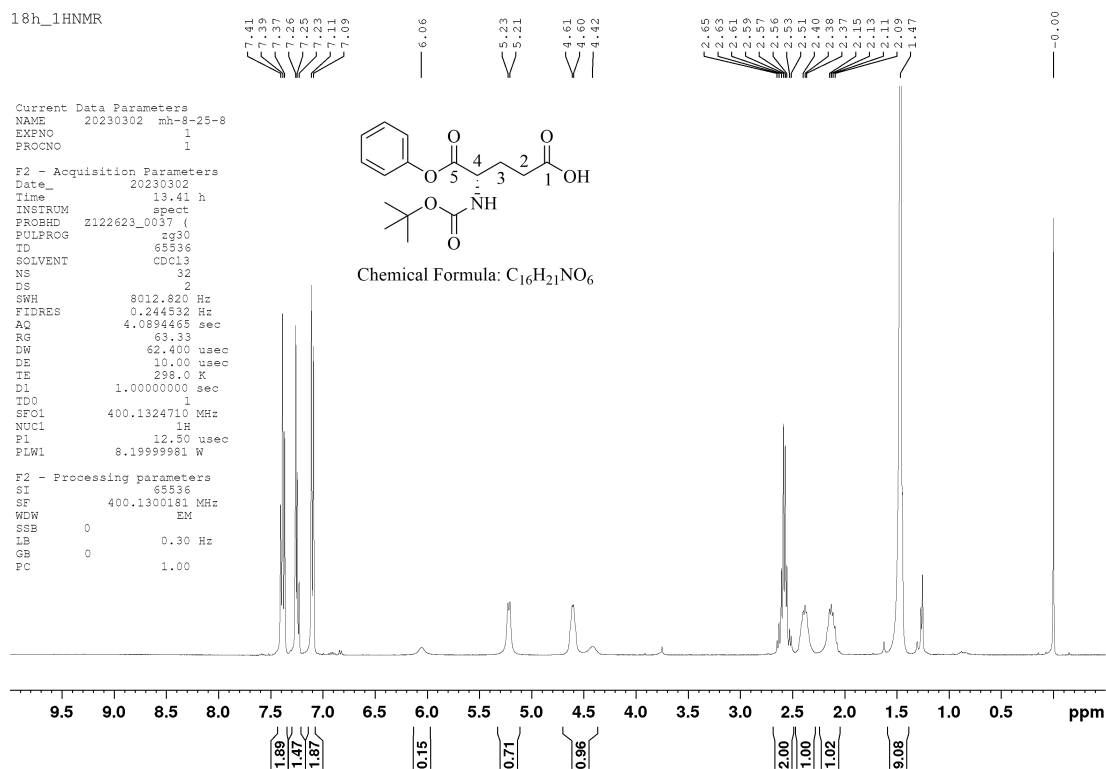

Fig. S27. <sup>1</sup>H NMR of intermediate 18h

Compound 63

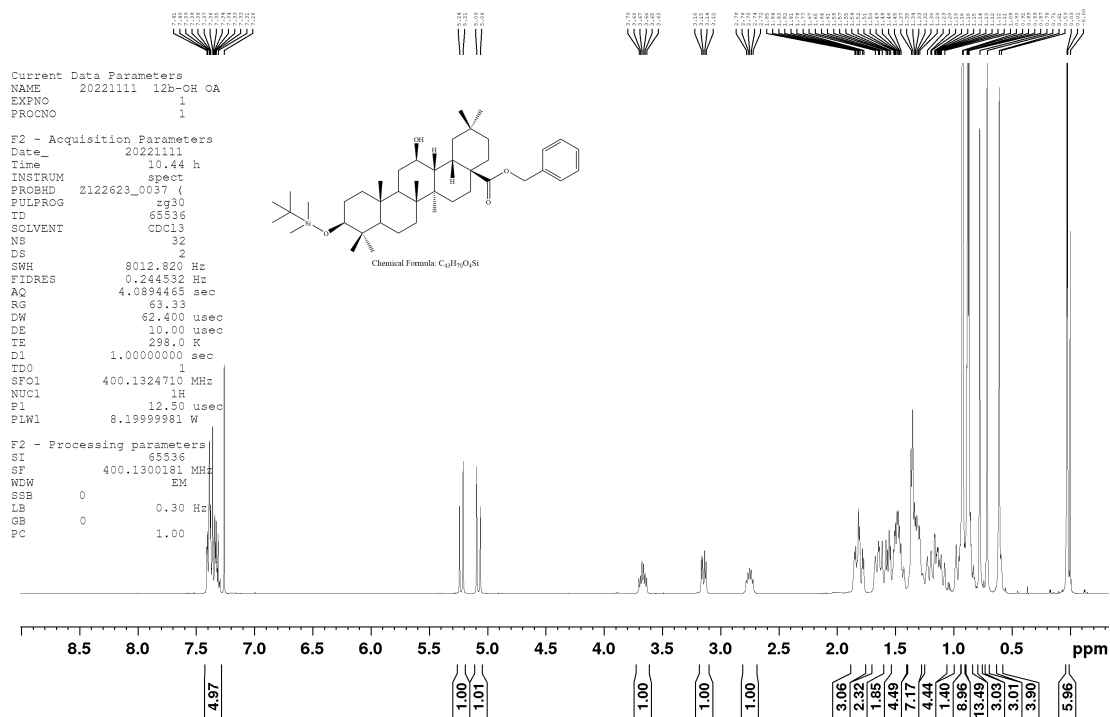

Fig. S28. <sup>1</sup>H NMR of compound 8

```
Current Data Parameters
NAME      20221111 12b-OH OA
EXPNO      2
PROCNO     1
```

```

P2 - Acquisition Parameters
Date_      20221111
Time       12.43 h
INSTRUM    spect
PROBHD     Z122623-03
PULPROG    zgpg30
TD          32768
SOLVENT    CDCl3
NS          799
DS          4
SWH         24038.461 Hz
FIDRES      1.467191 Hz
AQ          0.6515744 sec
RG          77.6
WDW          20.800 usec
DE          18.800 usec
TE          298.0 K
D1          1.00000000 sec
D11         0.03000000 sec
D10         140
P2          100.6238340 MHz
NUC1        13C
P1          9.84 usec
PLW1        38.00000000 W
SFO2        400.1316050 MHz
NUC2        1H
PCPDPRG2    waltz12
PCPD2       80.00 usec
PLW2        8.30000019 W
SFO1        500.1360900 MHz
PLW13       0.08053300 W

```

```
F2 - Processing parameters
SI                      32768
SF                      100.6127721 MHz
WDW                      EM
SSB                      0
LB                      1.00 Hz
GB                      0
PC                      1.40
```

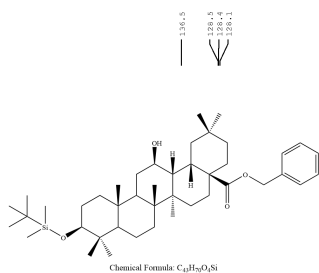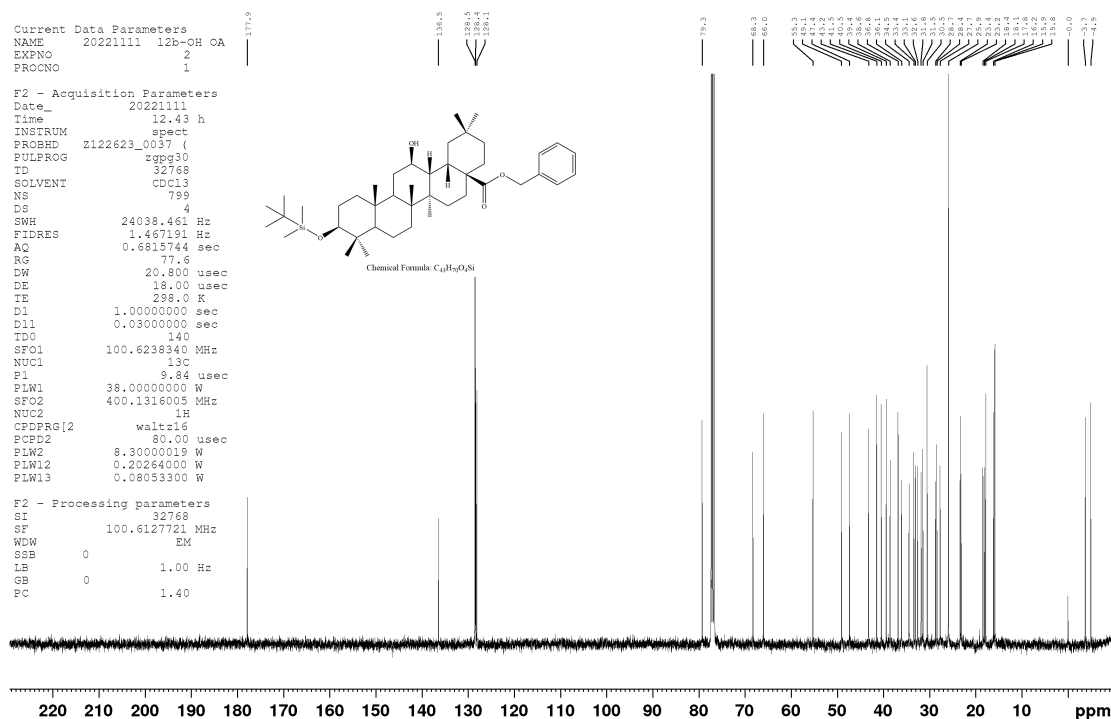

Compound 70a

```
Current Data Parameters
NAME      20220309  mh-8-17-S
EXPNO      1
PROCNO     1
```

```

F2 - Acquisition Parameters
Date_      20220309
Time       13.12 h
INSTRUM    spect
PROBHD     2122623_0037
PULPROG    zg30
TD          65536
SOLVENT    CDCl3
NS          32
DS          2
SWH         8012.820 Hz
FIDRES     0.244532 Hz
AQ         0.40894456 sec
RG         23.55
WDW         62.4000 usec
DE         10.00 usec
TE          298.0 K
D1          1.00000000 sec
TDO         1
SFO1       400.1324710 MHz
NUC1       1H
P1          12.50 usec
PLM1       8.19999981 W

```

```

F2 - Processing parameters
SI                      65536
SF                      400.1300109 MHz
WDW                      EM
SSB                      0
LB                      0.30 Hz
GB                      0
PC                      1.00

```

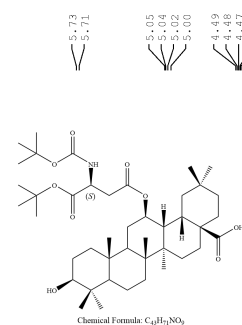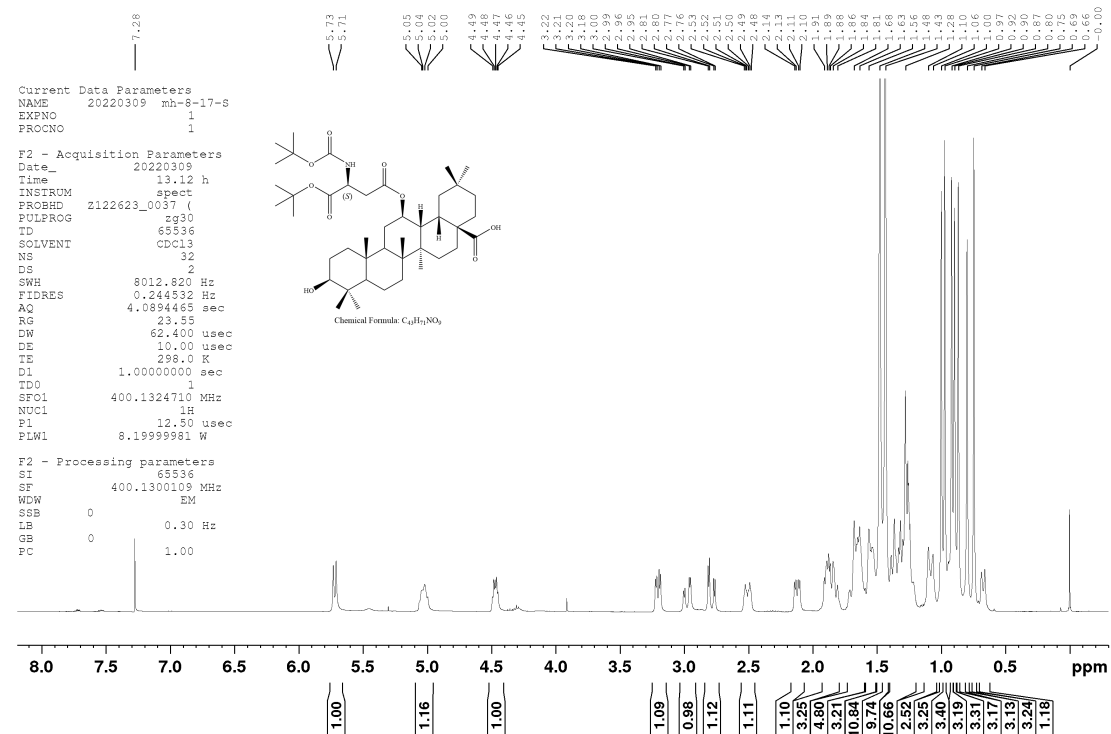

25

## Compound 70a

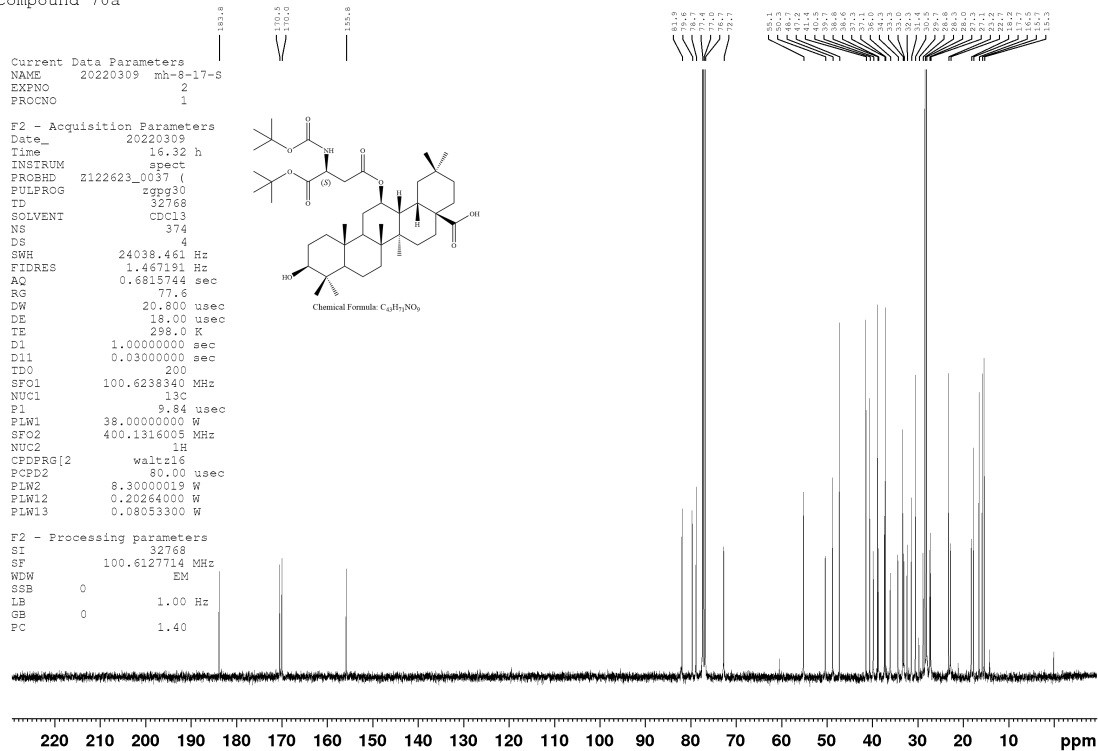Fig. S31.  $^{13}C$  NMR of compound 9a

## Compound 70b

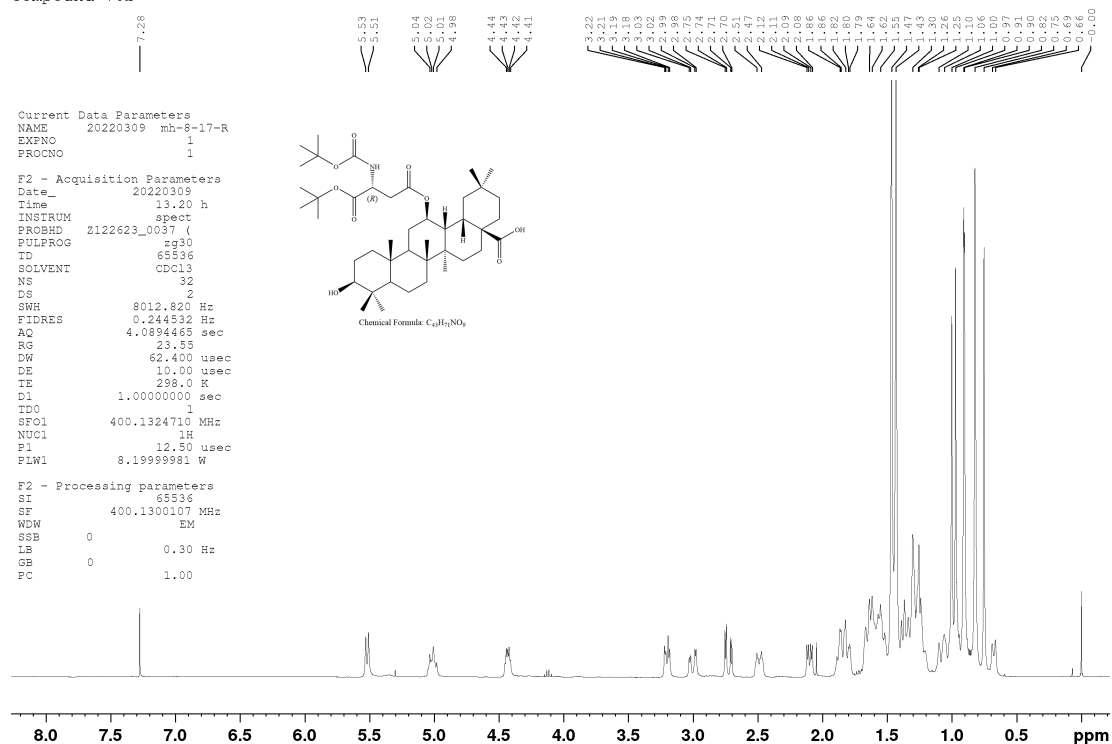Fig. S32.  $^1H$  NMR of compound 9b

Compound 70b

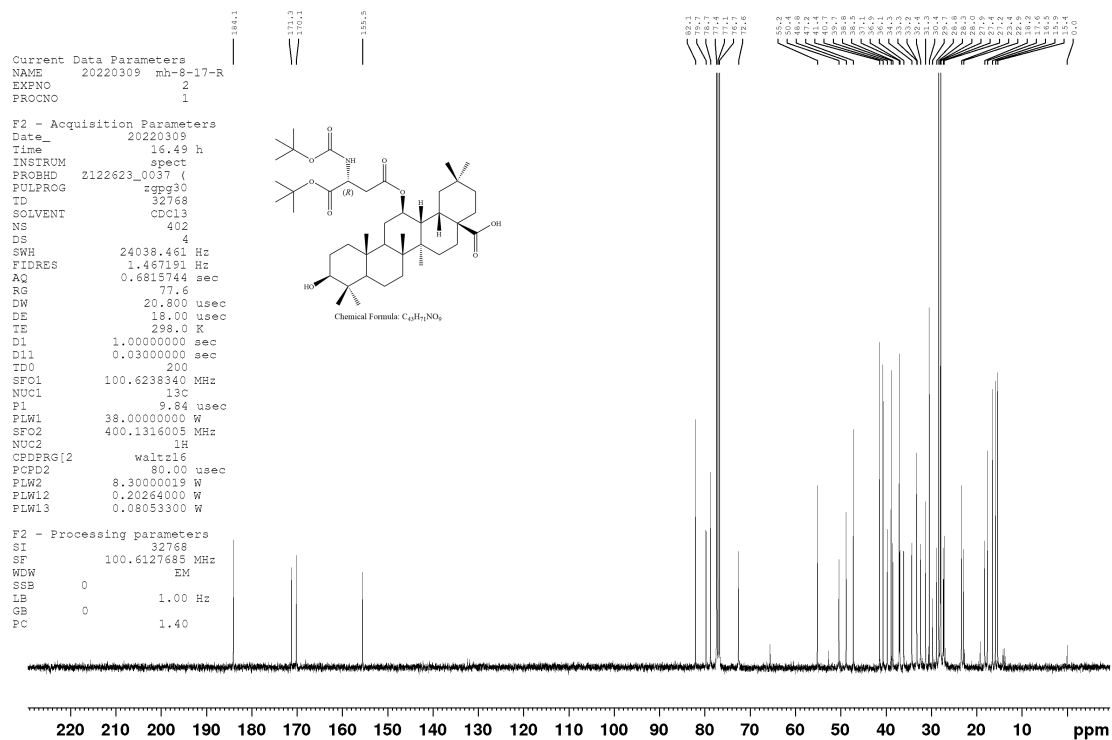Fig. S33.  $^{13}\text{C}$  NMR of compound 9b

Compound 69

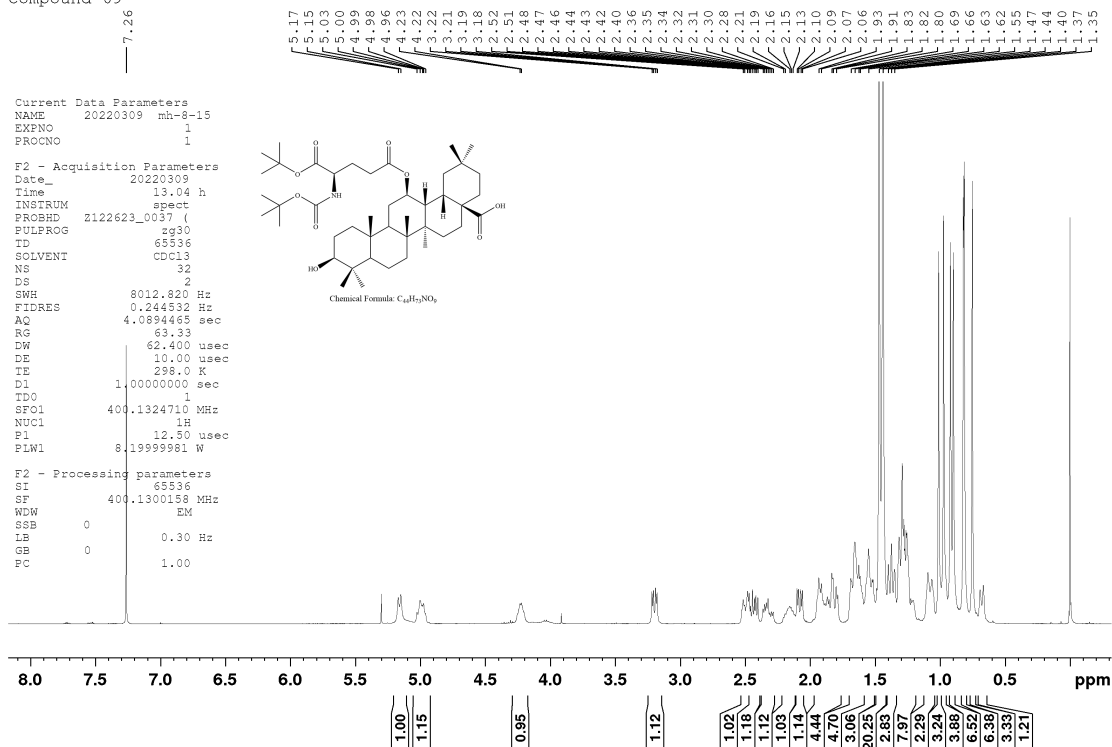Fig. S34.  $^1\text{H}$  NMR of compound 10a

Compound 69

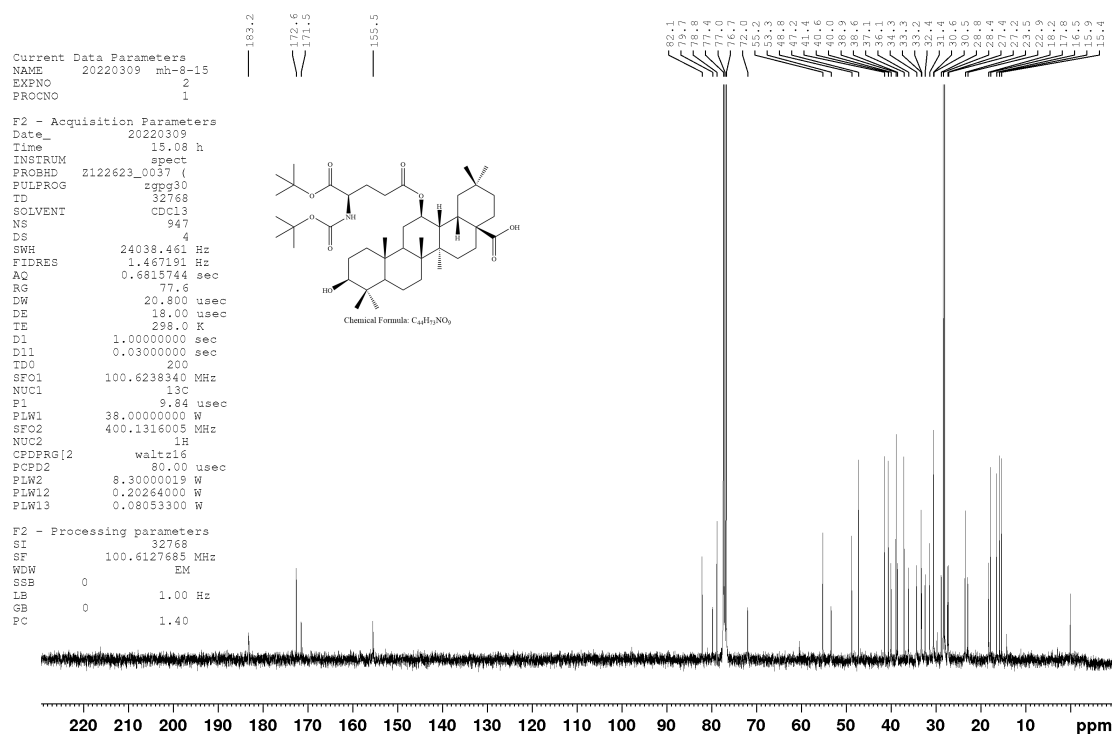Fig. S35.  $^{13}\text{C}$  NMR of compound 10a

Bruker AVANCEIII 400 20211124  
 PROTON2 CDC13 D:\ DATA-2021 7

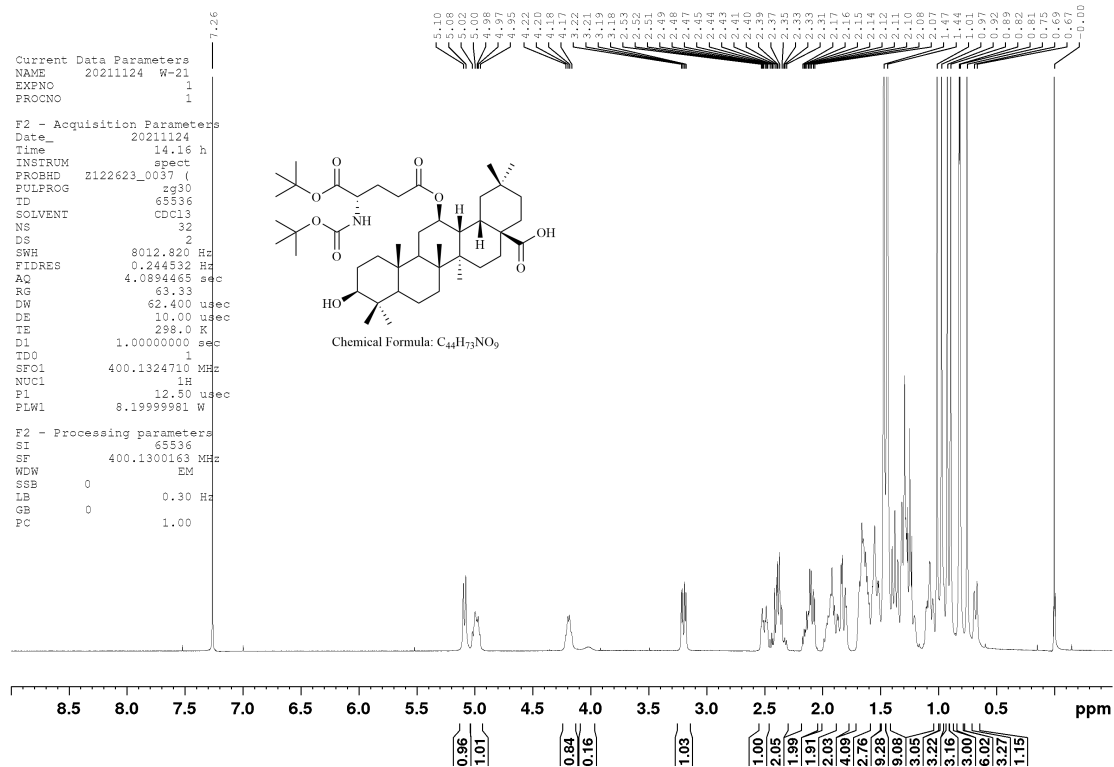Fig. S36.  $^1\text{H}$  NMR of compound 10b

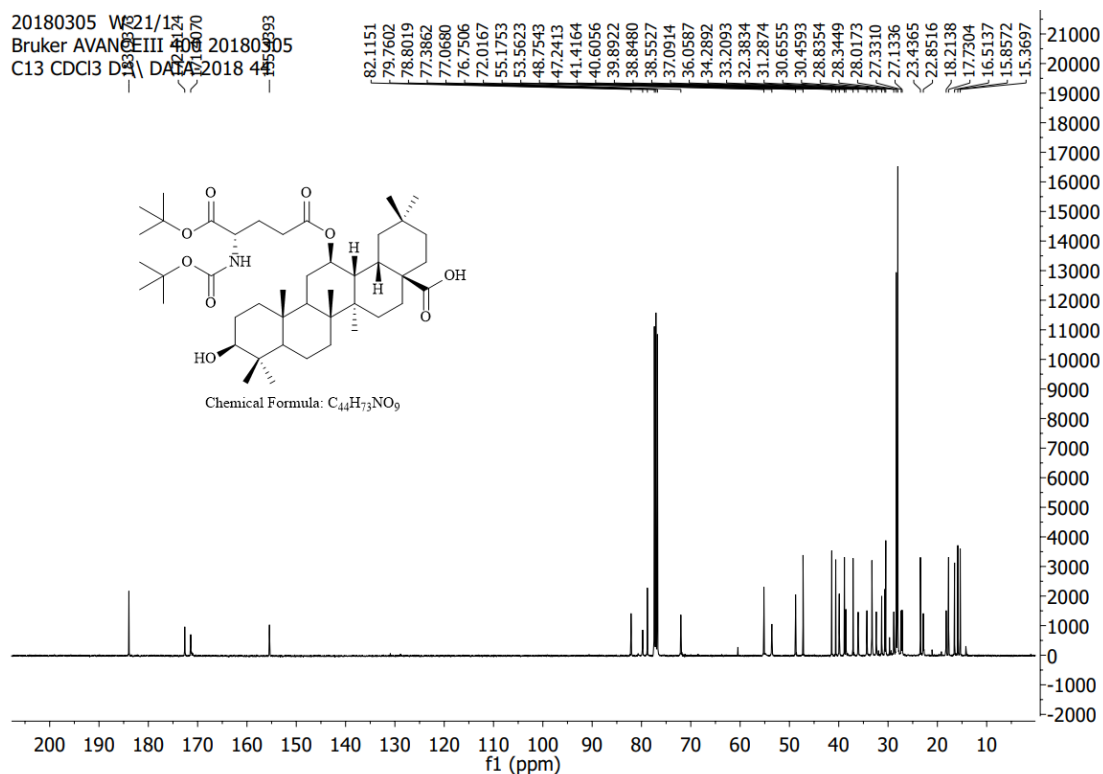

Fig. S37.  $^{13}C$  NMR of compound 10b

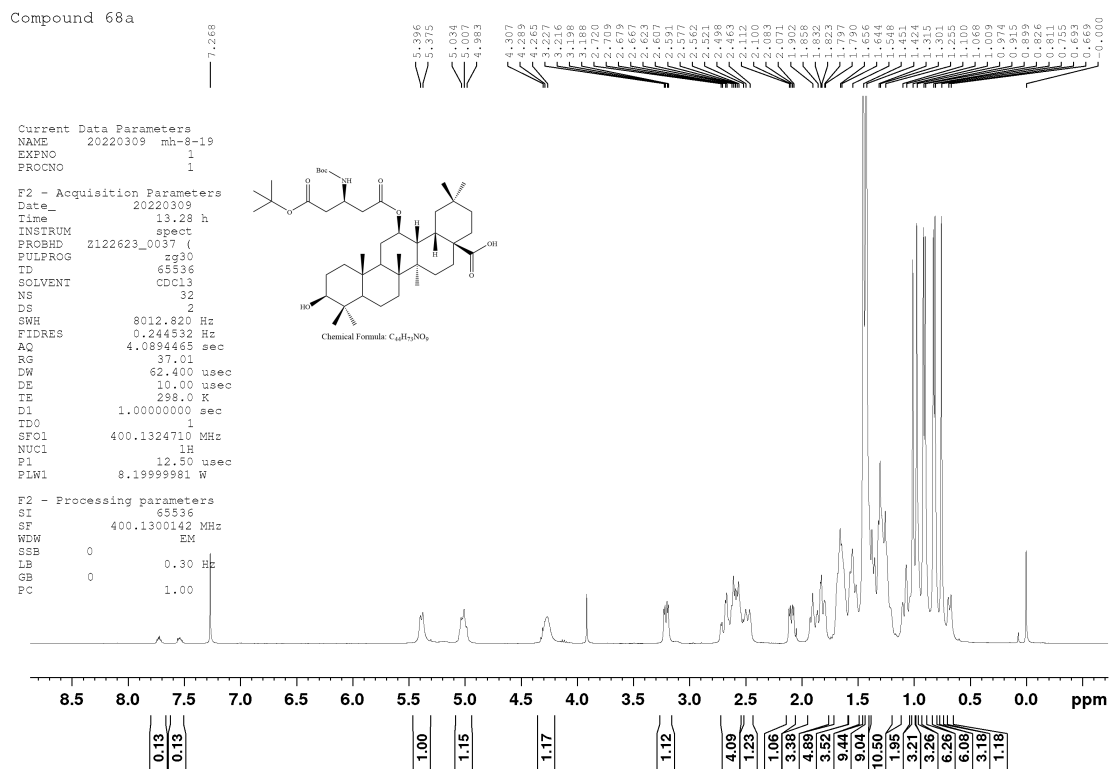

Fig. S38.  $^1H$  NMR of compound 10c

Current Data Parameters

NAME 20220309 mh-8-19  
EXPNO 2  
PROCNO 1

F2 - Acquisition Parameters

Date\_ 20220309  
Time 17.41 h  
INSTRUM spect  
PROBHD Z122623\_0037 (1  
PULPROG zgpg30  
TD 32768  
SOLVENT CDC13  
NS 1600  
DS 4  
SWH 24038.461 Hz  
FIDRES 1.467191 Hz  
AQ 0.6815744 sec  
RG 77.6  
DW 20.800 usec  
DE 18.00 usec  
TE 298.0 K  
D1 1.00000000 sec  
d11 0.03000000 sec  
TD0 200  
SFO1 100.6238340 MHz  
NUC1 13C  
P1 9.84 usec  
PL1 38.00000000 W  
SFO2 400.1316005 MHz  
NUC2 1H  
CPDPRG2 waltz16  
PCPD2 80.00 usec  
PLM2 8.30000019 W  
PLM12 0.20266000 W  
PLM13 0.08053300 W

F2 - Processing parameters

SI 32768  
SF 100.6127114 MHz  
WDW EM  
SSB 0  
LB 1.00 Hz  
GB 0  
PC 1.40

Chemical Formula:  $C_{24}H_{32}O_5$

183.56  
171.35  
159.45  
134.92  
78.32  
78.26  
78.16  
77.02  
76.92  
76.22  
65.15  
48.79  
48.75  
46.46  
46.44  
39.79  
39.75  
39.59  
39.54  
37.86  
37.84  
37.07  
36.97  
36.25  
36.23  
35.11  
35.11  
33.29  
33.43  
33.39  
28.39  
28.35  
26.02  
26.02  
23.46  
23.44  
21.74  
21.74  
21.18  
21.18  
18.47  
18.47  
15.83  
11.83

**Fig. S39.**  $^{13}\text{C}$  NMR of compound **10c**

Current Data Parameters

|        |                  |
|--------|------------------|
| NAME   | 20220309 mh-8-16 |
| EXPNO  | 1                |
| PROCNO | 1                |

F2 - Acquisition Parameters

|         |                 |
|---------|-----------------|
| Date_   | 20220309        |
| Time    | 12.57 h         |
| INSTRUM | spect           |
| PROBHD  | Z122623_0037 (  |
| FULPROG | zg30            |
| TD      | 65536           |
| SOLVENT | CDCl3           |
| NS      | 32              |
| DS      | 2               |
| SWH     | 8012.820 Hz     |
| FIDRES  | 0.244532 Hz     |
| AQ      | 4.0894455 sec   |
| RG      | 63.33           |
| DW      | 62.400 usec     |
| DE      | 10.00 usec      |
| TE      | 298.0 K         |
| D1      | 1.00000000 sec  |
| TD0     | 1               |
| SFO1    | 400.1324710 MHz |
| NUC1    | 1H              |
| P1      | 12.50 usec      |
| PLW1    | 8.19899981 W    |

F2 - Processing parameters

|     |                 |
|-----|-----------------|
| SI  | 65536           |
| SF  | 400.1300153 MHz |
| WDW | EM              |
| SBB | 0               |
| LB  | 0.30 Hz         |
| GB  | 0               |
| PC  | 1.00            |

Chemical Formula:  $C_{24}H_{37}NO_3$

**Fig. S40.**  $^1\text{H}$  NMR of compound **10d**

Compound 68b

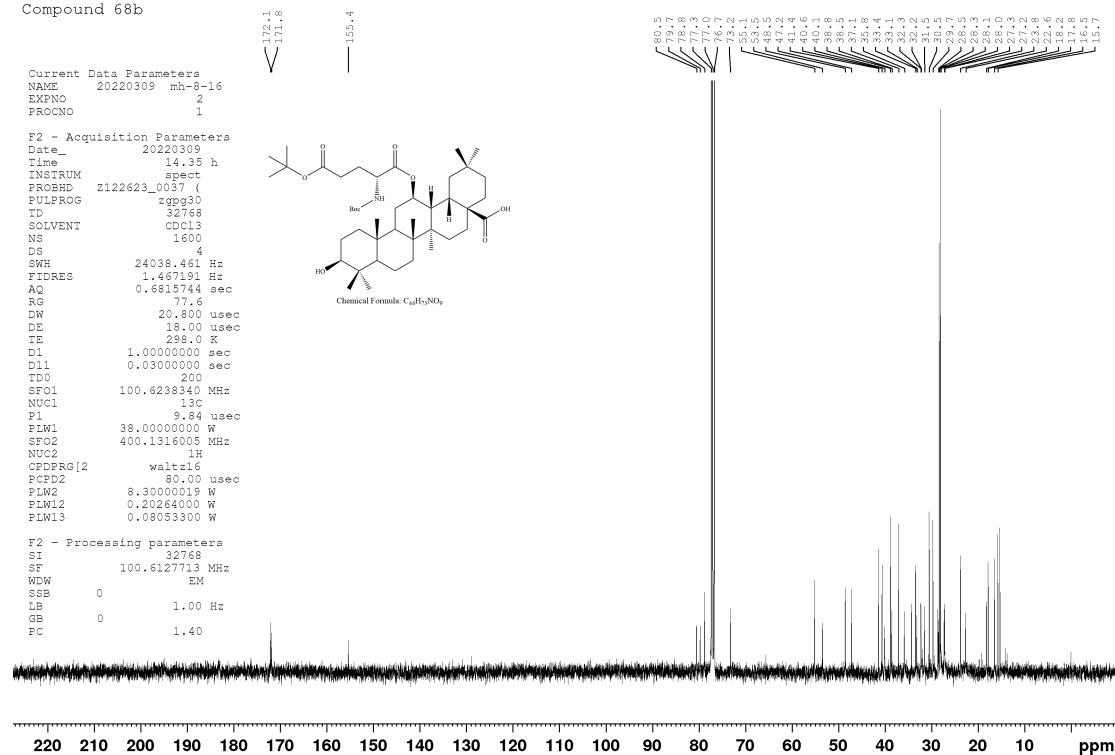Fig. S41.  $^{13}\text{C}$  NMR of compound 10d

Bruker AVANCEIII 400 20220113  
PROTON2 MeOD D:\DATA-2021 16

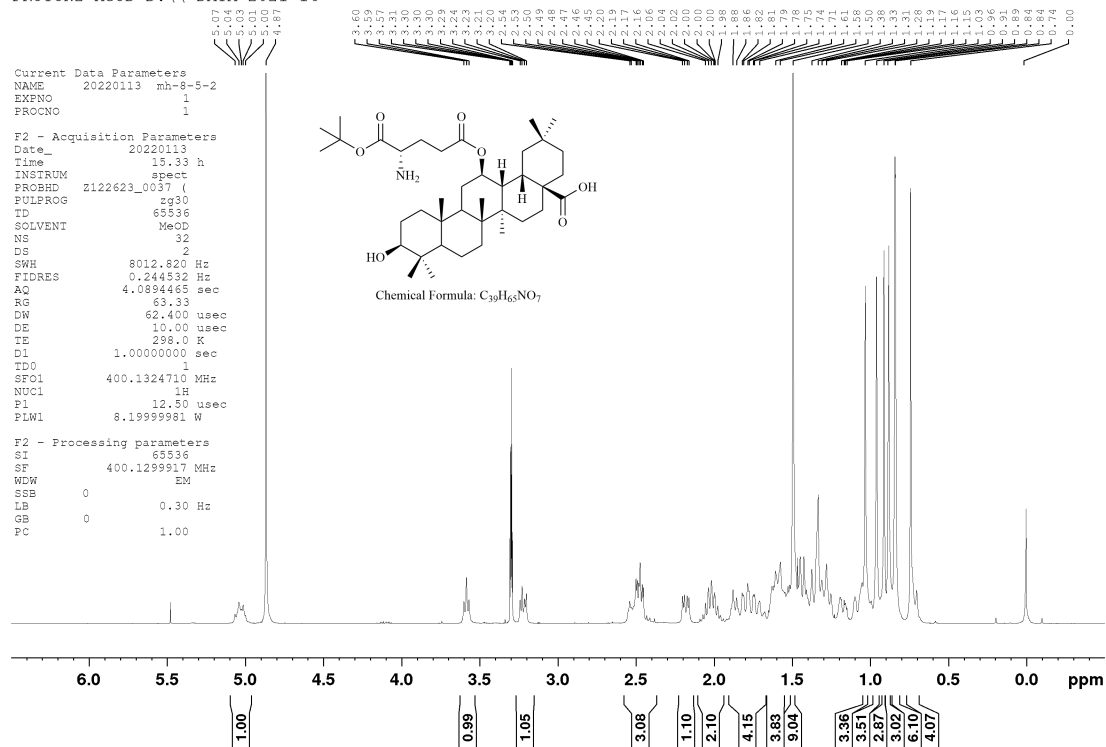Fig. S42.  $^1\text{H}$  NMR of compound 11a

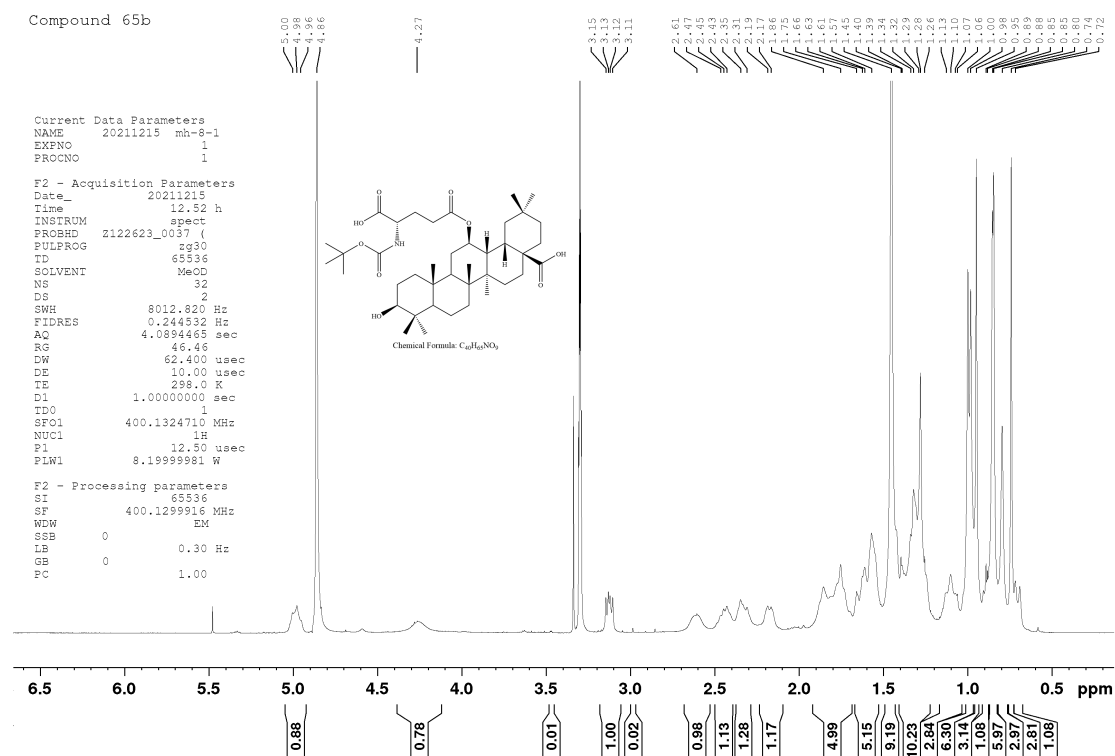

Fig. S43.  $^1\text{H}$  NMR of compound 11b

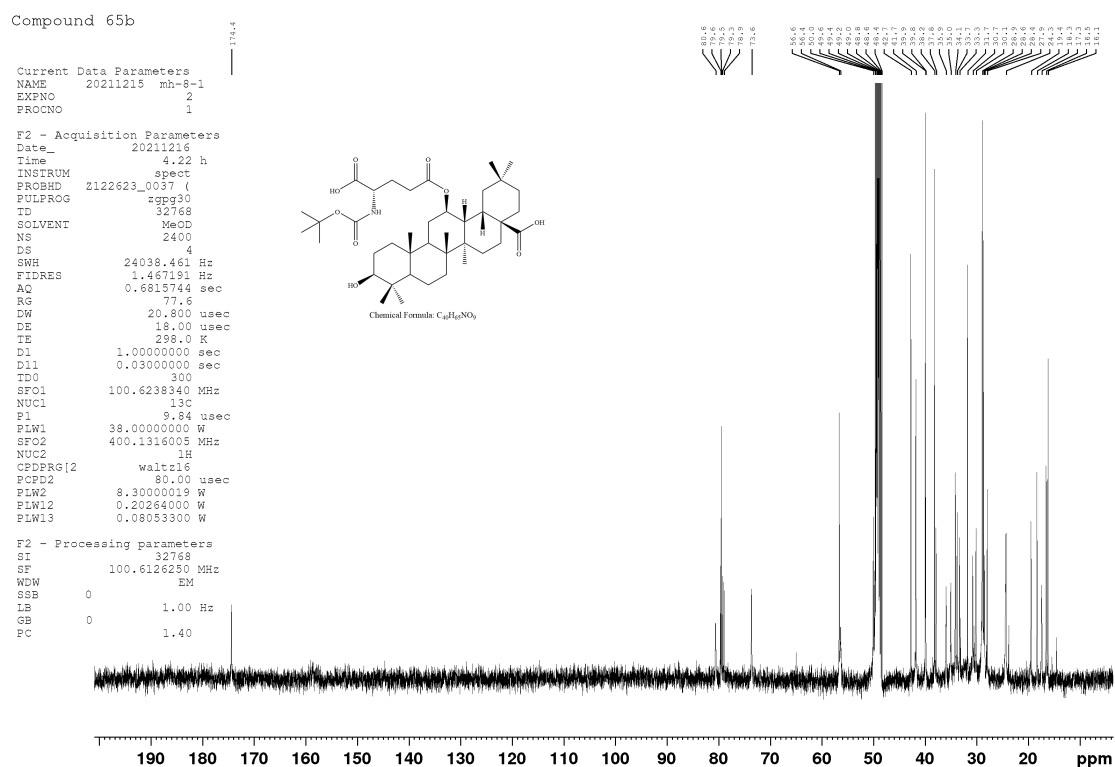

Fig. S44.  $^{13}\text{C}$  NMR of compound 11b

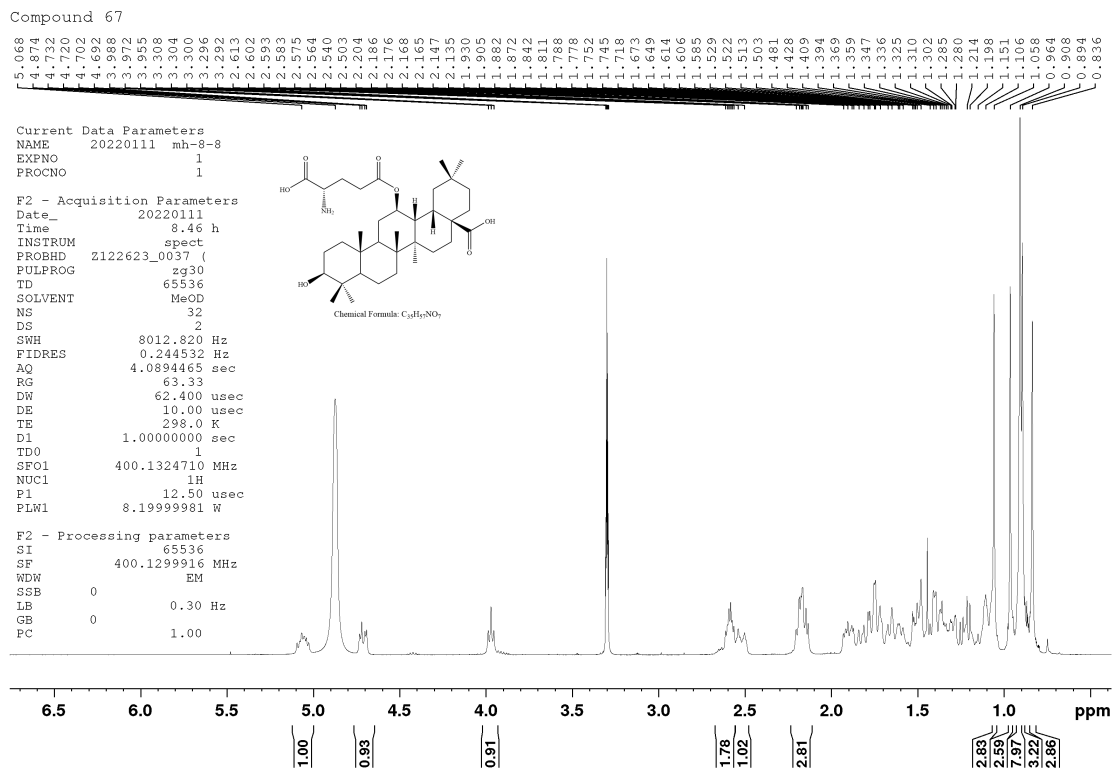

Fig. S45.  $^1\text{H}$  NMR of compound 11c

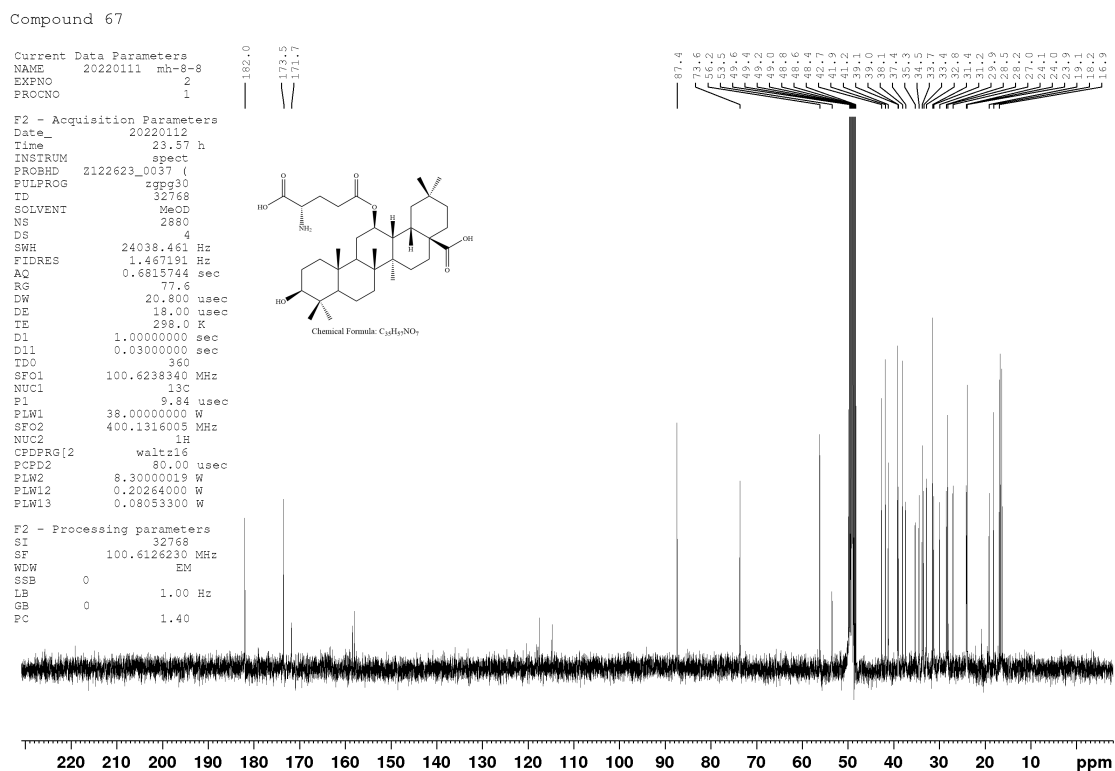

Fig. S46.  $^{13}\text{C}$  NMR of compound 11c

Compound 74a

Current Data Parameters  
NAME 20220628 mh-8-27-1  
EXPNO 1  
PROCNO 1

F2 - Acquisition Parameters  
Date\_ 20220628  
Time 14.21 h  
INSTRUM spect  
PROBHD z122623\_0037  
PULPROG zg30  
TD 65536  
SOLVENT CDCl3  
NS 32  
DS 2  
SWH 8012.820 Hz  
FIDRES 0.244532 Hz  
AQ 4.0894465 sec  
RG 37.01  
DW 62.400 usec  
DE 10.00 usec  
TE 298.0 K  
D1 1.00000000 sec  
TD0 1  
SFO1 400.1324710 MHz  
NUC1 1H  
P1 12.50 usec  
PLW1 8.19999981 W

F2 - Processing parameters  
SI 65536  
SF 400.1300144 MHz  
WDW EM  
SSB 0  
LB 0.30 Hz  
GB 0  
PC 1.00

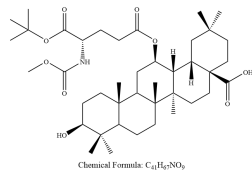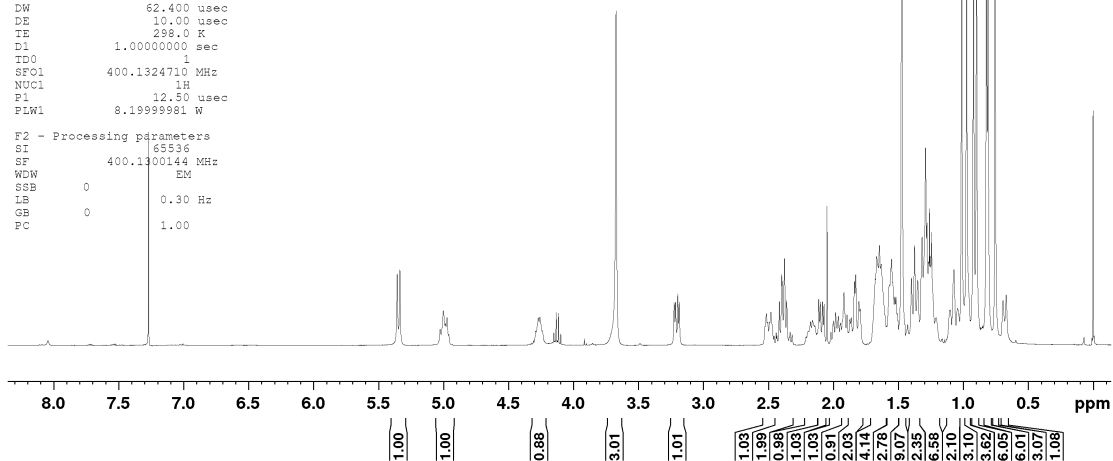

Fig. S47.  $^1\text{H}$  NMR of compound 19a

Compound 74a

Current Data Parameters  
NAME 20220628 mh-8-27-1  
EXPNO 2  
PROCNO 1

F2 - Acquisition Parameters  
Date\_ 20220629  
Time 8.20 h  
INSTRUM spect  
PROBHD z122623\_0037  
PULPROG zgpg30  
TD 32768  
SOLVENT CDCl3  
NS 473  
DS 4  
SWH 24038.461 Hz  
FIDRES 1.467191 Hz  
AQ 0.6815744 sec  
RG 77.6  
DW 20.800 usec  
DE 18.00 usec  
TE 298.0 K  
D1 1.00000000 sec  
D11 0.03000000 sec  
TD0 200  
SFO1 100.6238340 MHz  
NUC1  $^{13}\text{C}$   
P1 9.84 usec  
PLW1 38.00000000 W  
SFO2 400.1316005 MHz  
NUC2 1H  
CPDPRG[2] waltz16  
PCPD2 80.00 usec  
PLW2 8.30000019 W  
PLW12 0.20264000 W  
PLW13 0.08053300 W

F2 - Processing parameters  
SI 32768  
SF 100.6127583 MHz  
WDW EM  
SSB 0  
LB 1.00 Hz  
GB 0  
PC 1.40

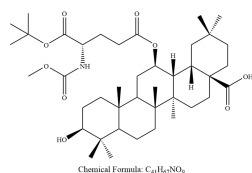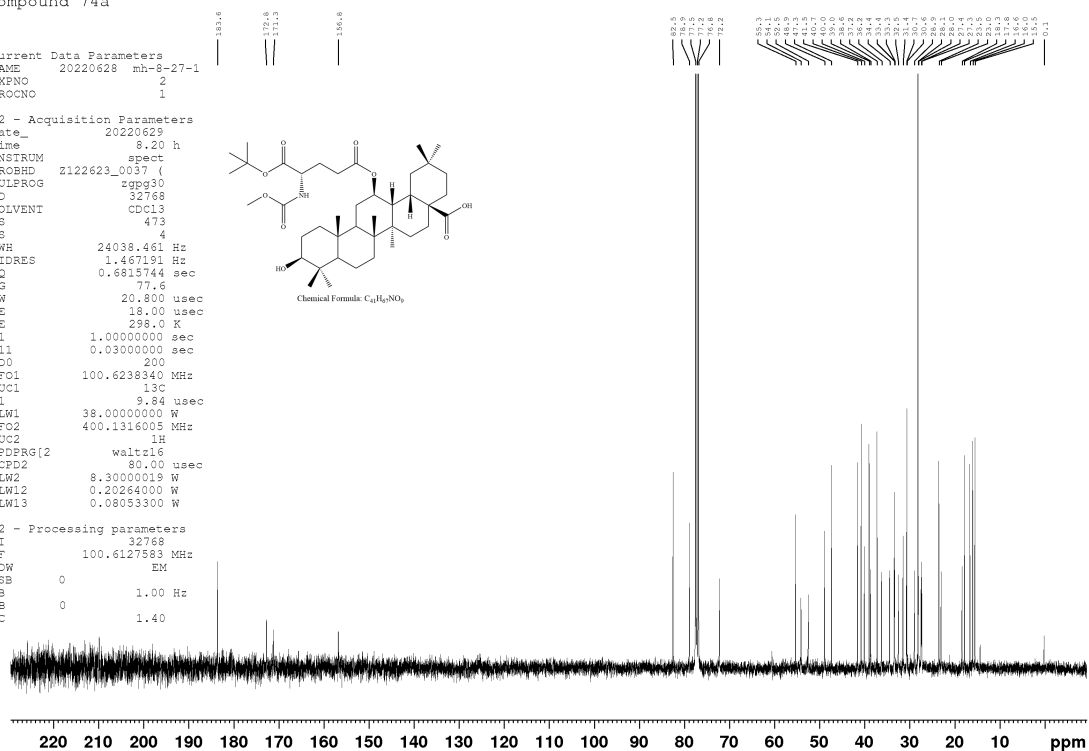

Fig. S48.  $^{13}\text{C}$  NMR of compound 19a

Compound 74b

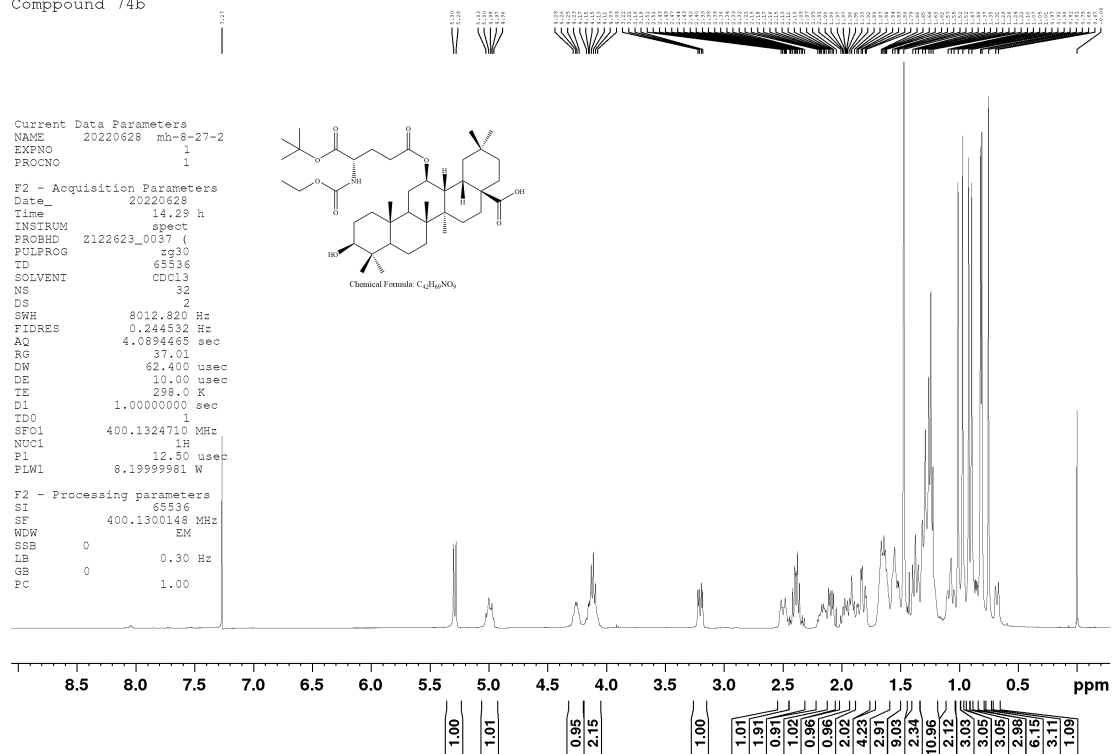

Fig. S49.  $^1\text{H}$  NMR of compound 19b

Compound 74b

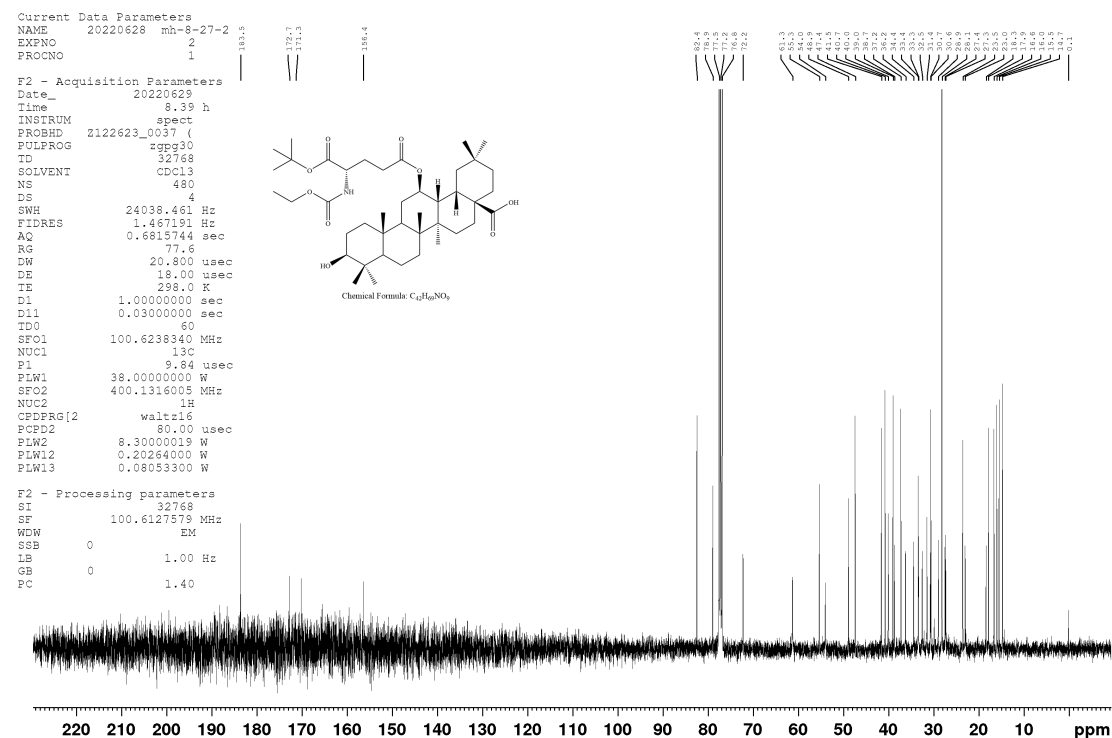

Fig. S50.  $^{13}\text{C}$  NMR of compound 19b

## Compound 74c

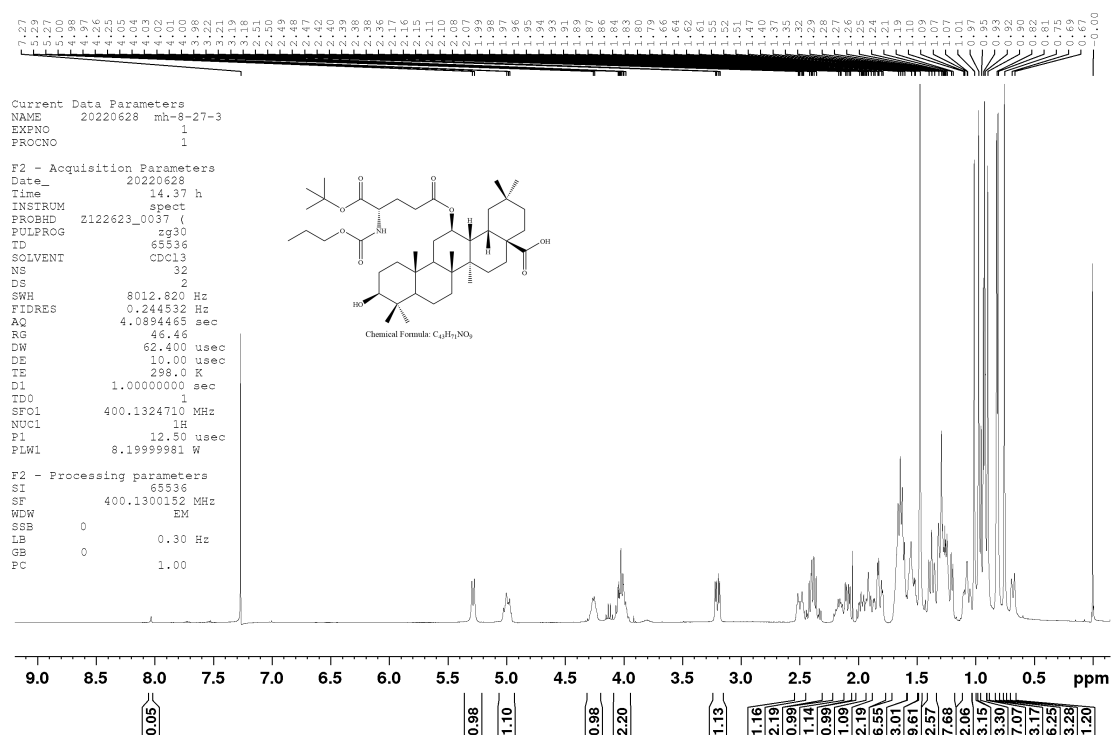Fig. S51.  $^1\text{H}$  NMR of compound 19c

## Compound 74c

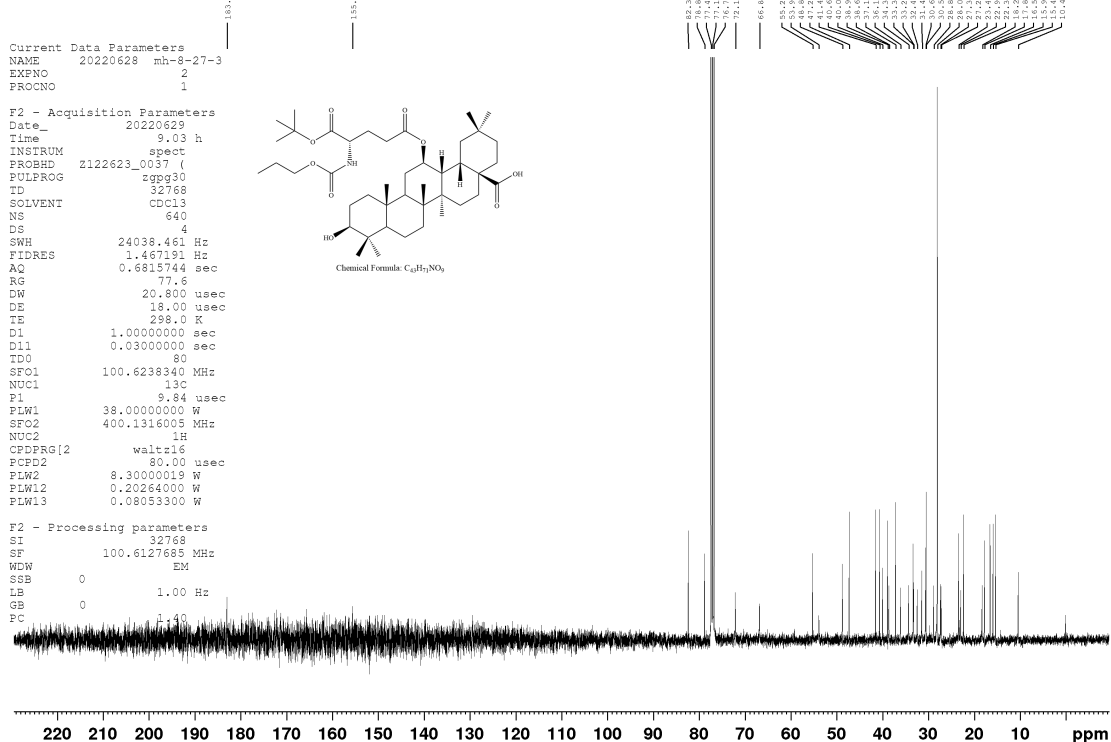Fig. S52.  $^{13}\text{C}$  NMR of compound 19c

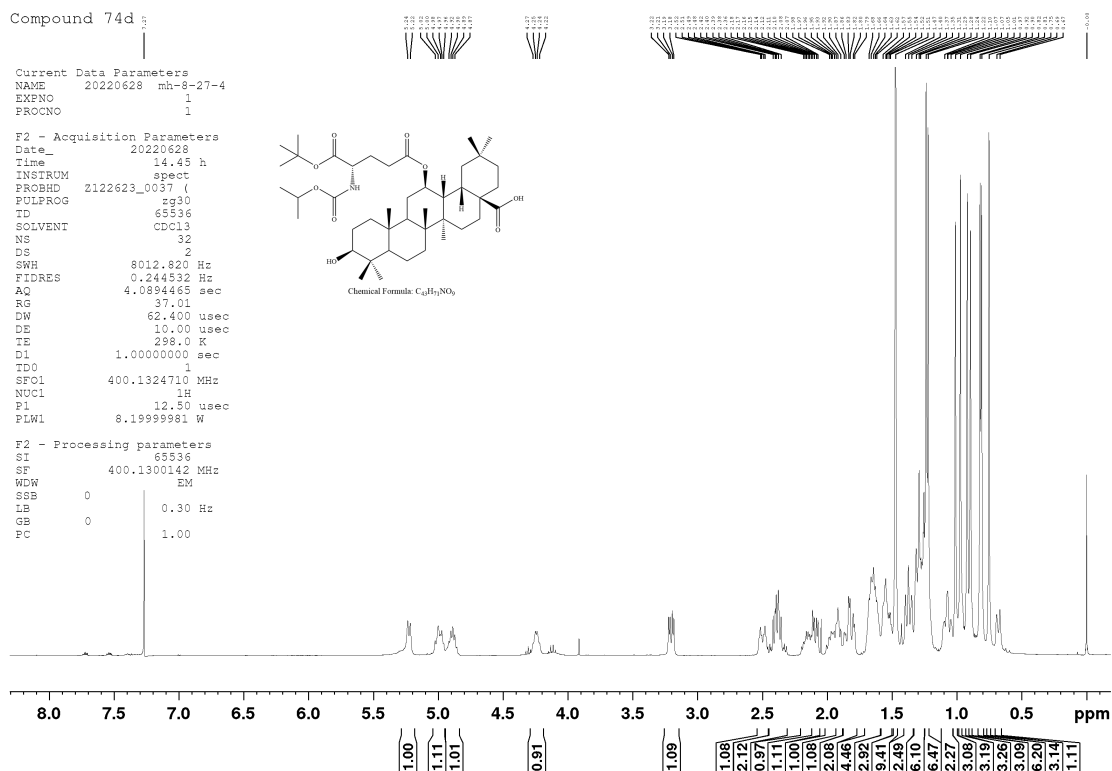

Fig. S53.  $^1\text{H}$  NMR of compound 19d

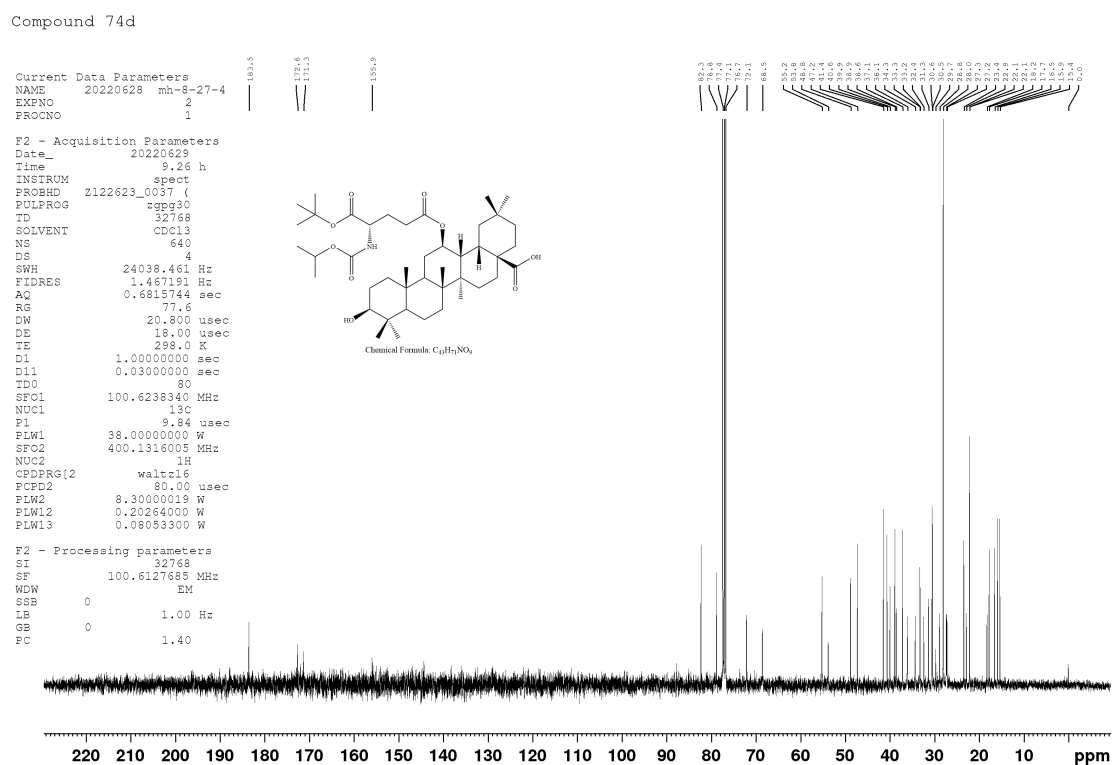

Fig. S54.  $^{13}\text{C}$  NMR of compound 19d

Compound 74e

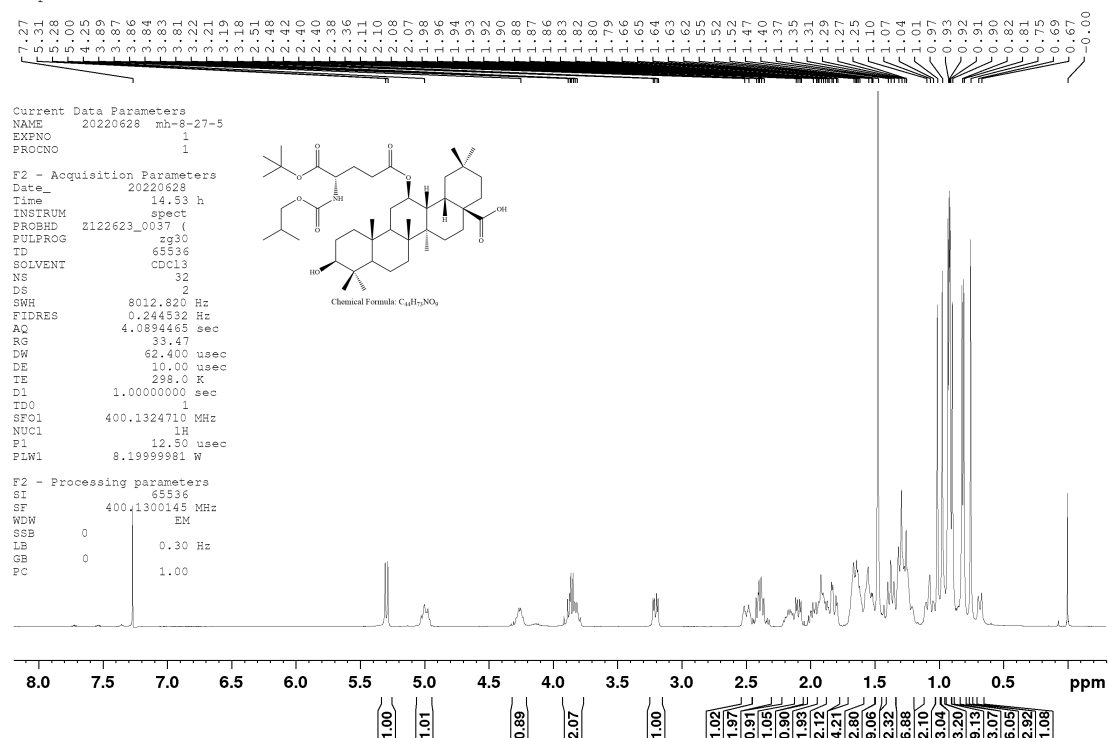Fig. S55.  $^1H$  NMR of compound 19e

Compound 74e

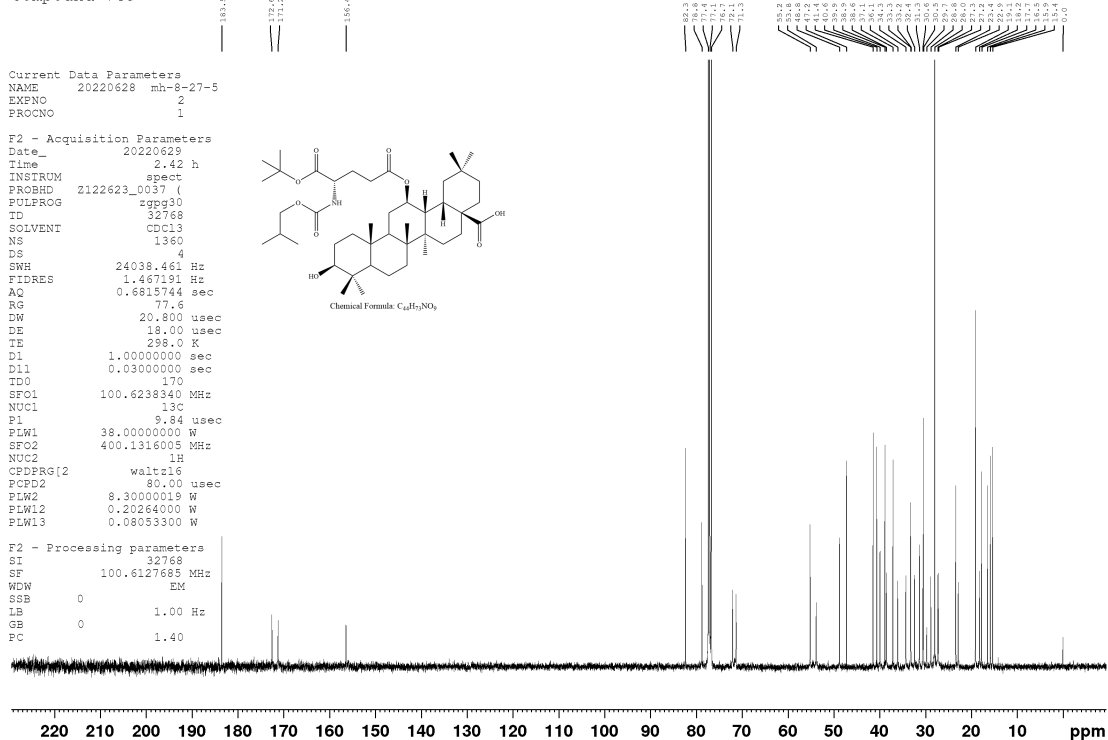Fig. S56.  $^{13}C$  NMR of compound 19e

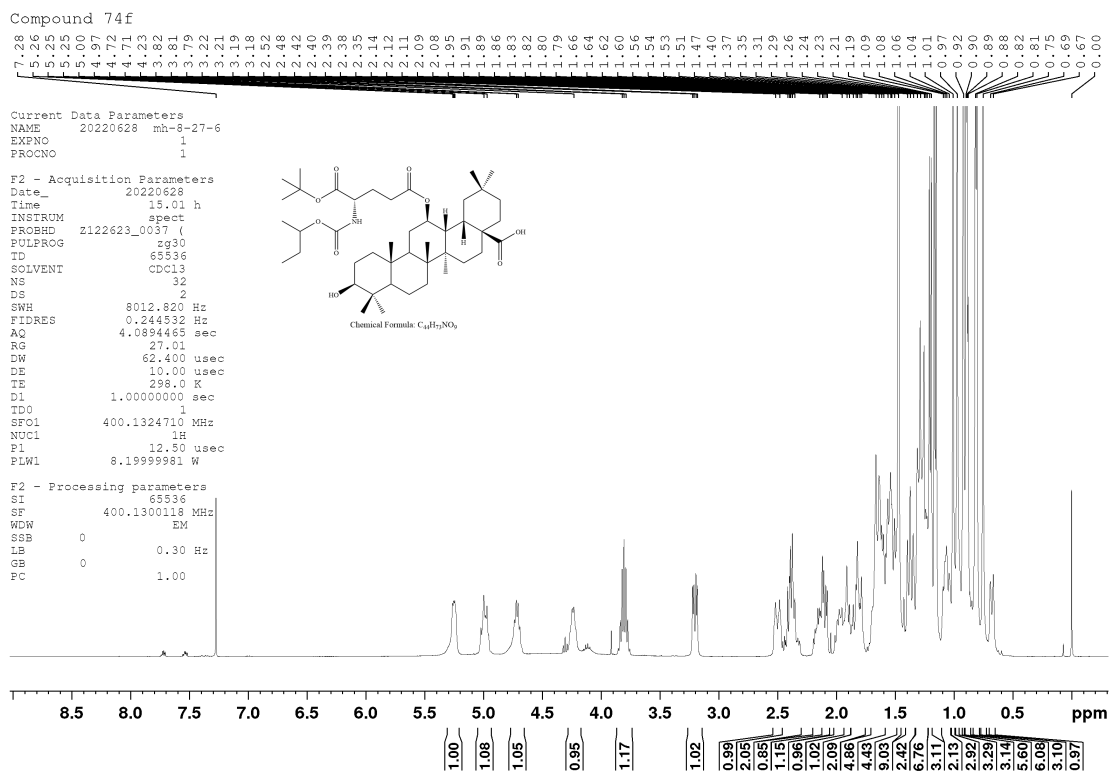

Fig. S57.  $^1\text{H}$  NMR of compound 19f

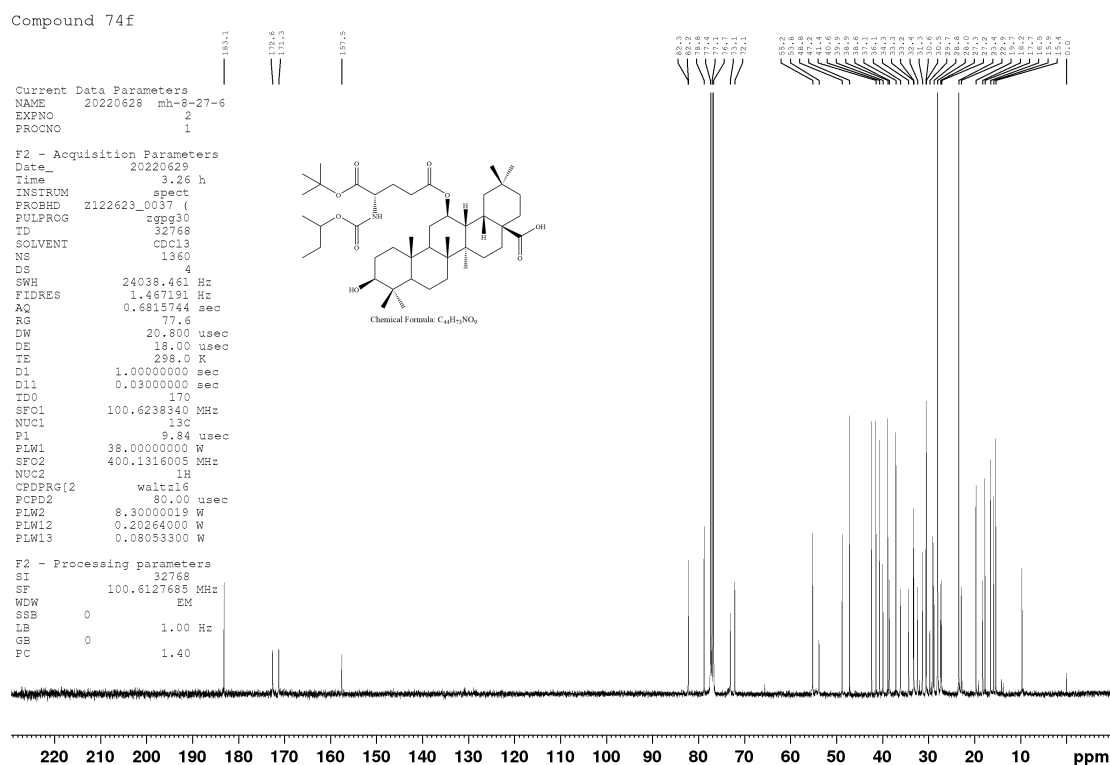

Fig. S58.  $^{13}\text{C}$  NMR of compound 19f



Compound 74h

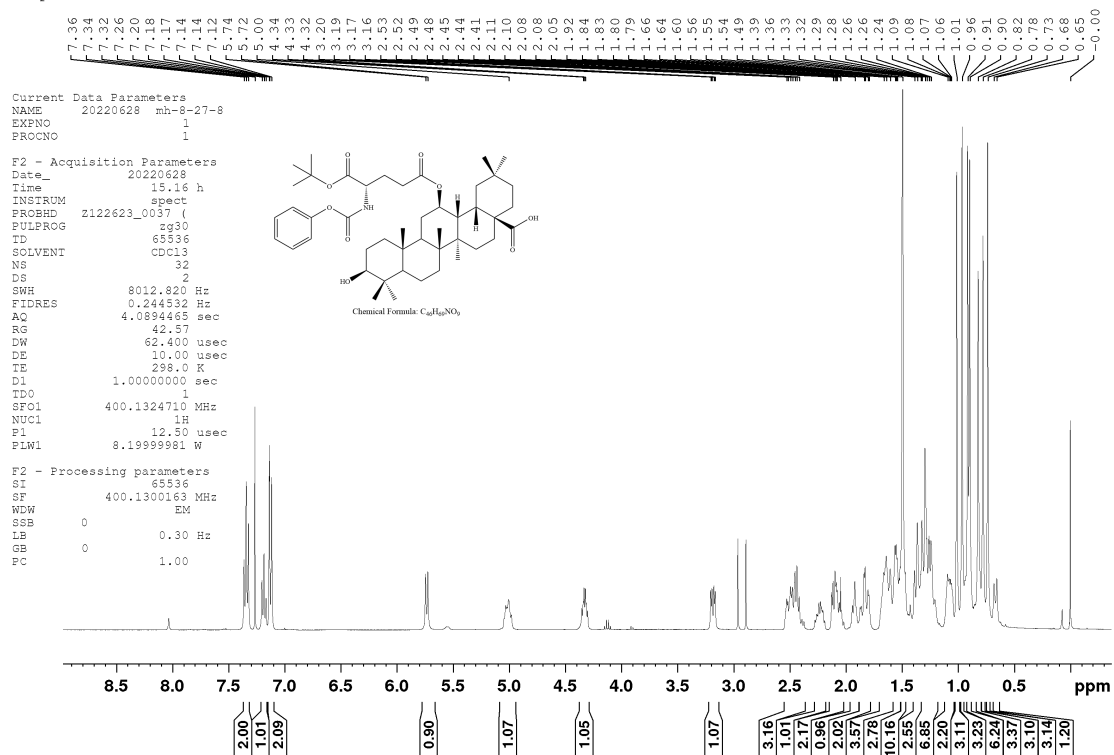Fig. S61.  $^1\text{H}$  NMR of compound 19h

Compound 74h

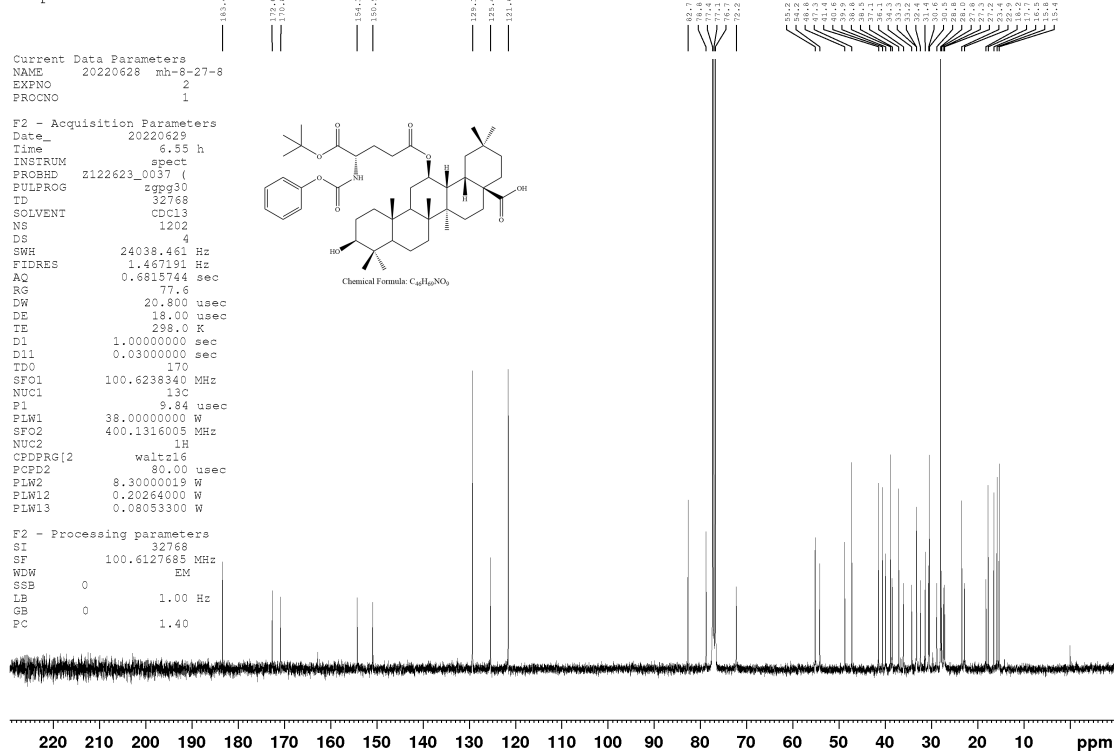Fig. S62.  $^{13}\text{C}$  NMR of compound 19h

Compound 79a

Current Data Parameters  
NAME 20220713 mh-8-28-1  
EXPNO 1  
PROCNO 1

F2 - Acquisition Parameters  
Date\_ 20220713  
Time 13:37 h  
INSTRUM spect  
PROBHD Z122623\_0037 (   
PULPROG zg30  
TD 65536  
SOLVENT CDCl3  
NS 32  
DS 2  
SWH 8012.820 Hz  
FIDRES 0.244532 Hz  
AQ 4.0894465 sec  
RG 27.01  
DW 62.400 usec  
DE 10.00 usec  
TE 298.0 K  
D1 1.0000000 sec  
TD0 1  
SFO1 400.1324710 MHz  
NUC1 1H  
P1 12.50 usec  
PLW1 8.19999981 W

F2 - Processing parameters  
SI 65536  
SF 400.1300107 MHz  
WDW EM  
SSB 0  
LB 0.30 Hz  
GB 0  
PC 1.00

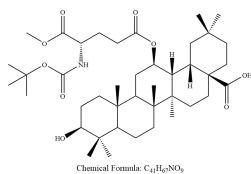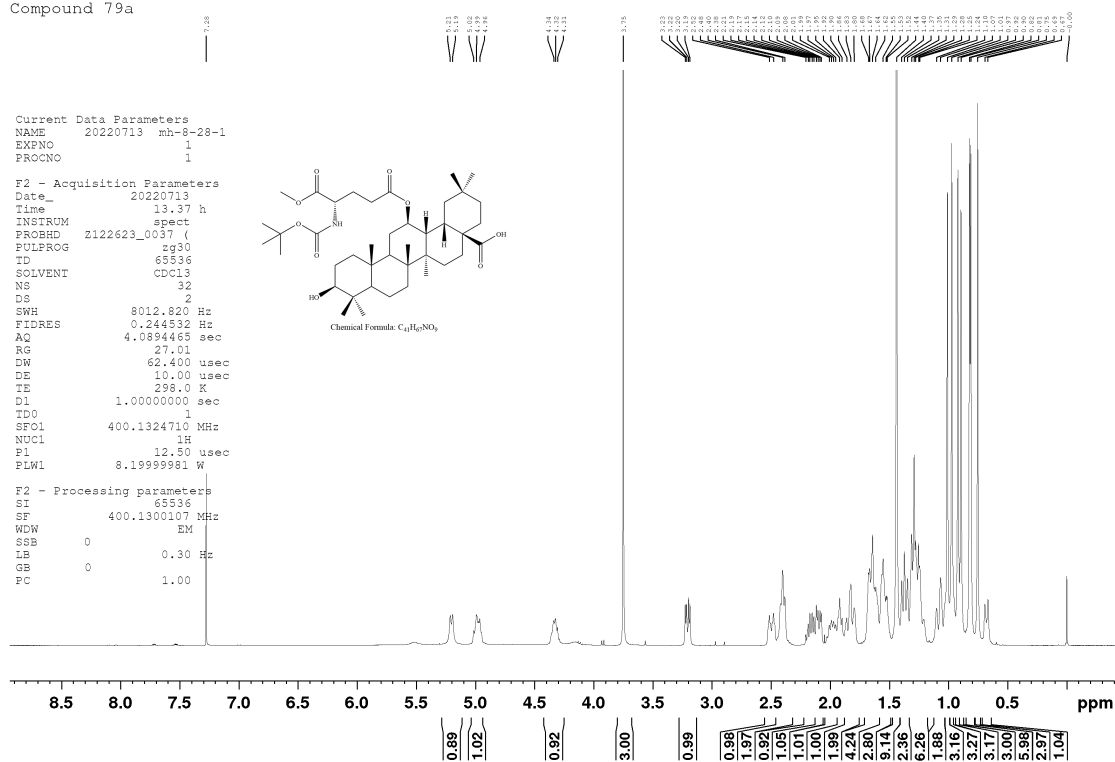

Fig. S63.  $^1\text{H}$  NMR of compound 20a

Compound 79a

Current Data Parameters  
NAME 20220713 mh-8-28-1  
EXPNO 2  
PROCNO 1

F2 - Acquisition Parameters  
Date\_ 20220714  
Time 11:31 h  
INSTRUM spect  
PROBHD Z122623\_0037 (   
PULPROG zgpg30  
TD 32768  
SOLVENT CDCl3  
NS 1120  
DS 4  
SWH 24038.461 Hz  
FIDRES 1.467191 Hz  
AQ 0.6815744 sec  
RG 77.6  
DW 20.800 usec  
DE 18.00 usec  
TE 298.0 K  
D1 1.0000000 sec  
D11 0.0300000 sec  
TD0 140  
SFO1 100.6238340 MHz  
NUC1 13C  
P1 9.84 usec  
PLW1 38.0000000 W  
SFO2 400.1316005 MHz  
NUC2 1H  
CPDPRG12 waltz16  
PCPD2 80.00 usec  
PLW2 8.30000019 W  
PLW12 0.20264000 W  
PLW13 0.08053300 W

F2 - Processing parameters  
SI 32768  
SF 100.6127713 MHz  
WDW EM  
SSB 0  
LB 1.00 Hz  
GB 0  
PC 1.40

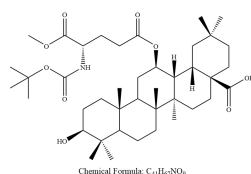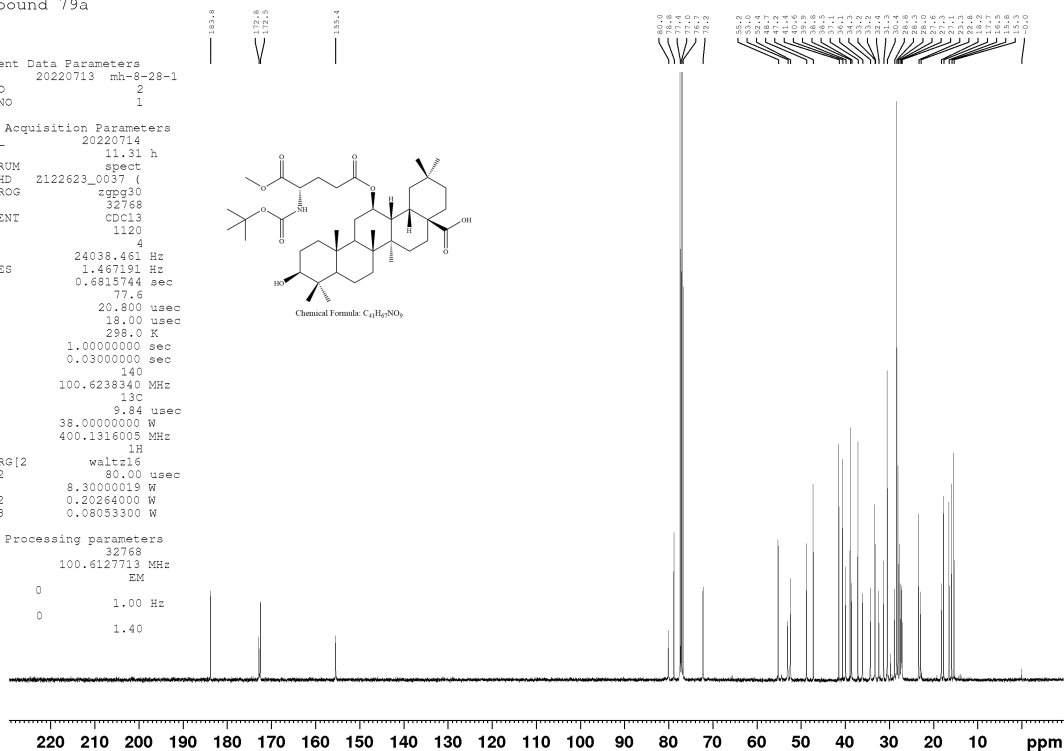

Fig. S64.  $^{13}\text{C}$  NMR of compound 20a

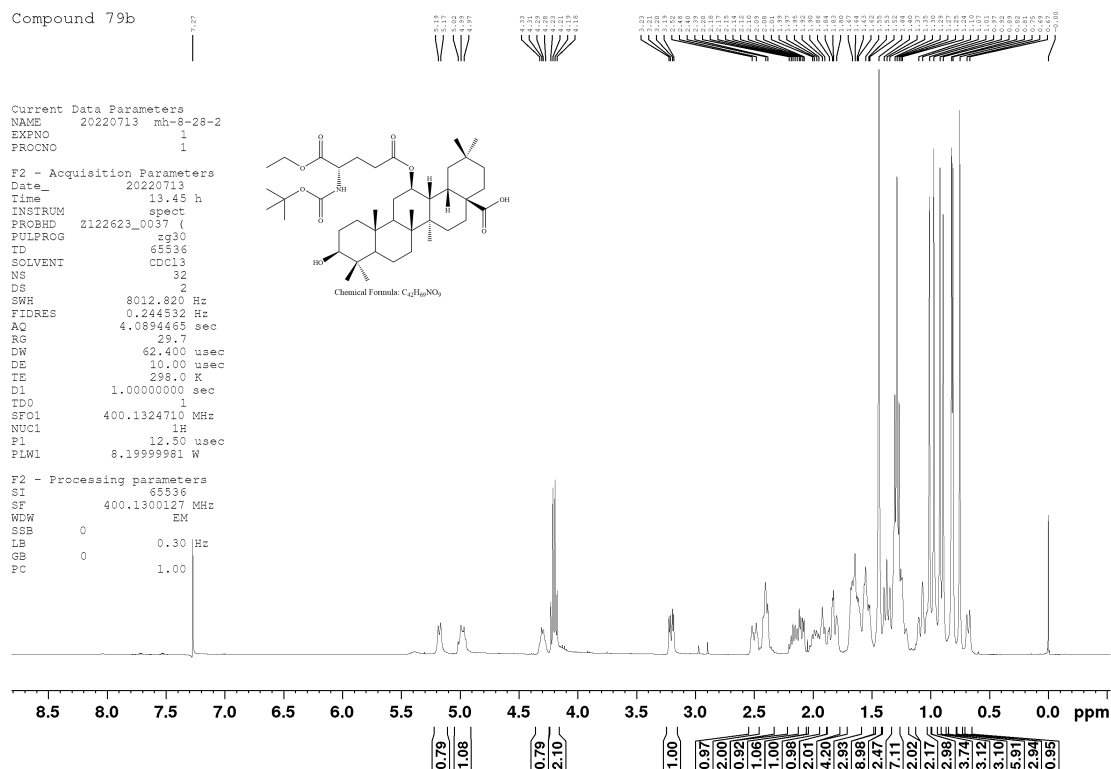

Fig. S65.  $^1\text{H}$  NMR of compound 20b

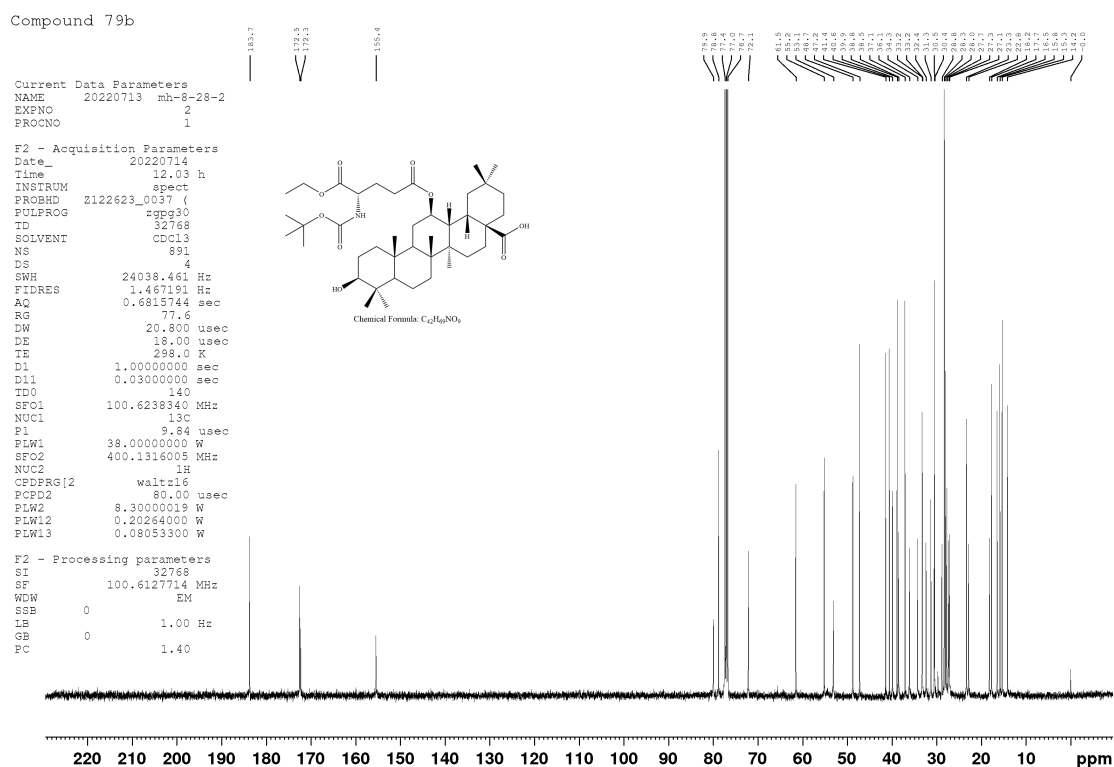

Fig. S66.  $^{13}\text{C}$  NMR of compound 20b

Compound 79c

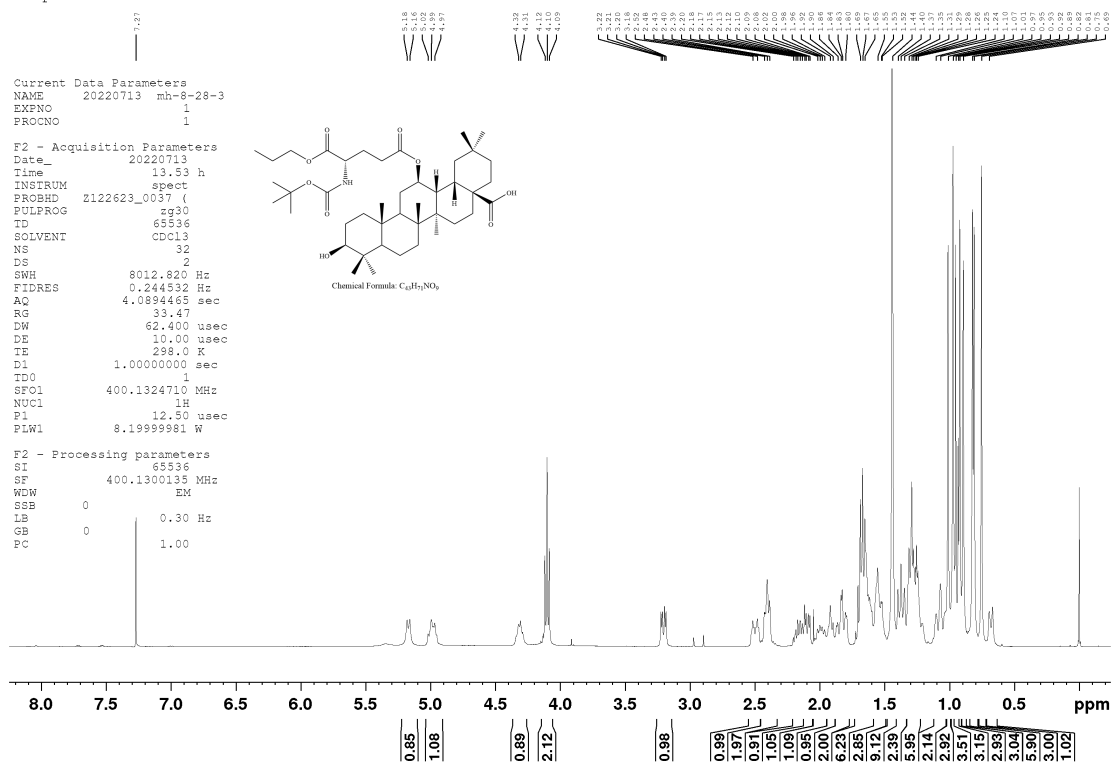Fig. S67.  $^1\text{H}$  NMR of compound 20c

Compound 79c

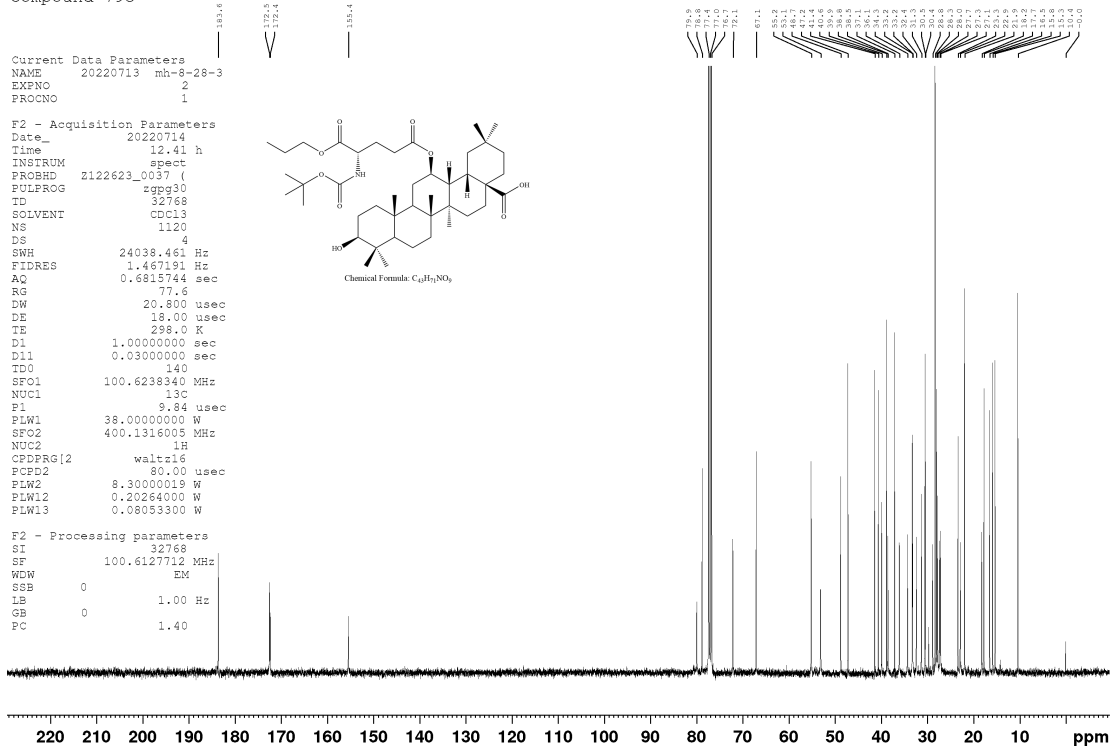Fig. S68.  $^{13}\text{C}$  NMR of compound 20c



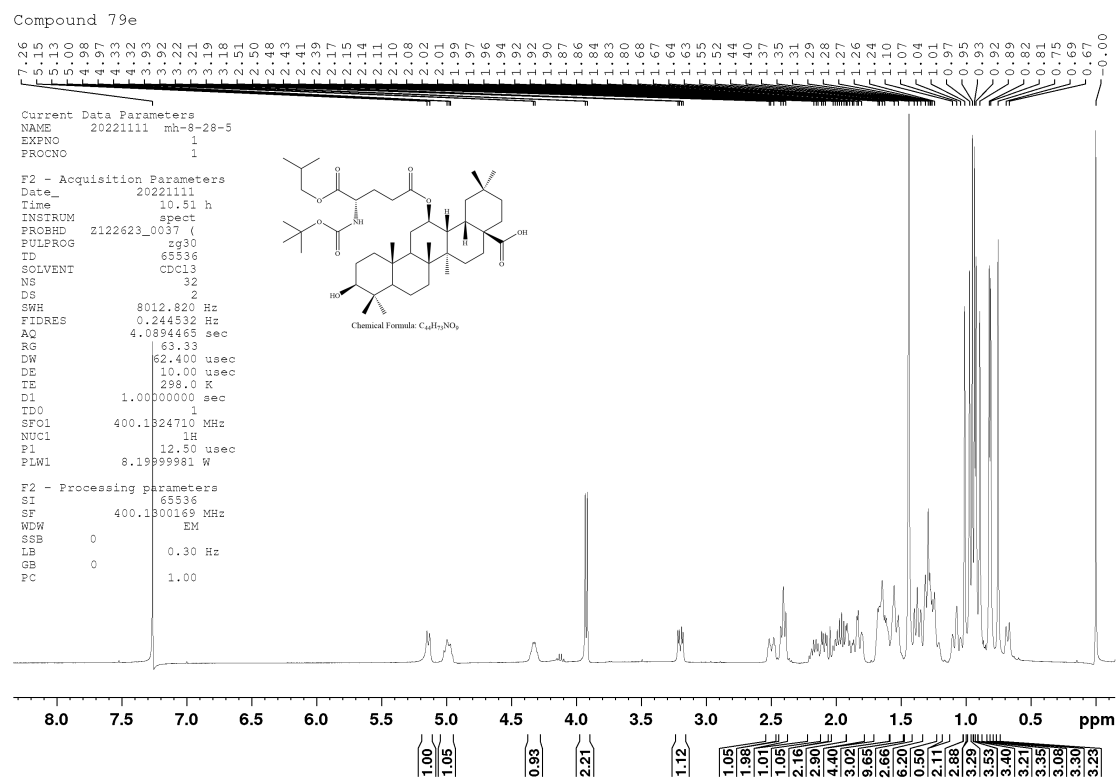

Fig. S71.  $^1\text{H}$  NMR of compound 20e

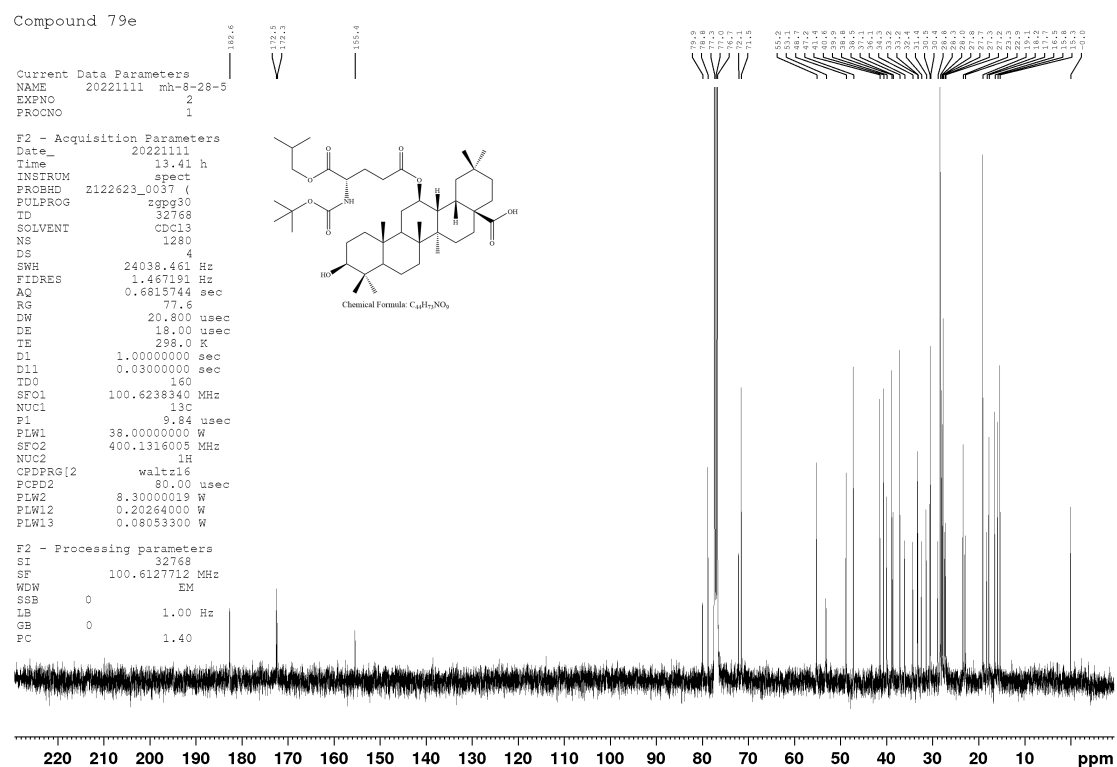

Fig. S72.  $^{13}\text{C}$  NMR of compound 20e

Compound 79f

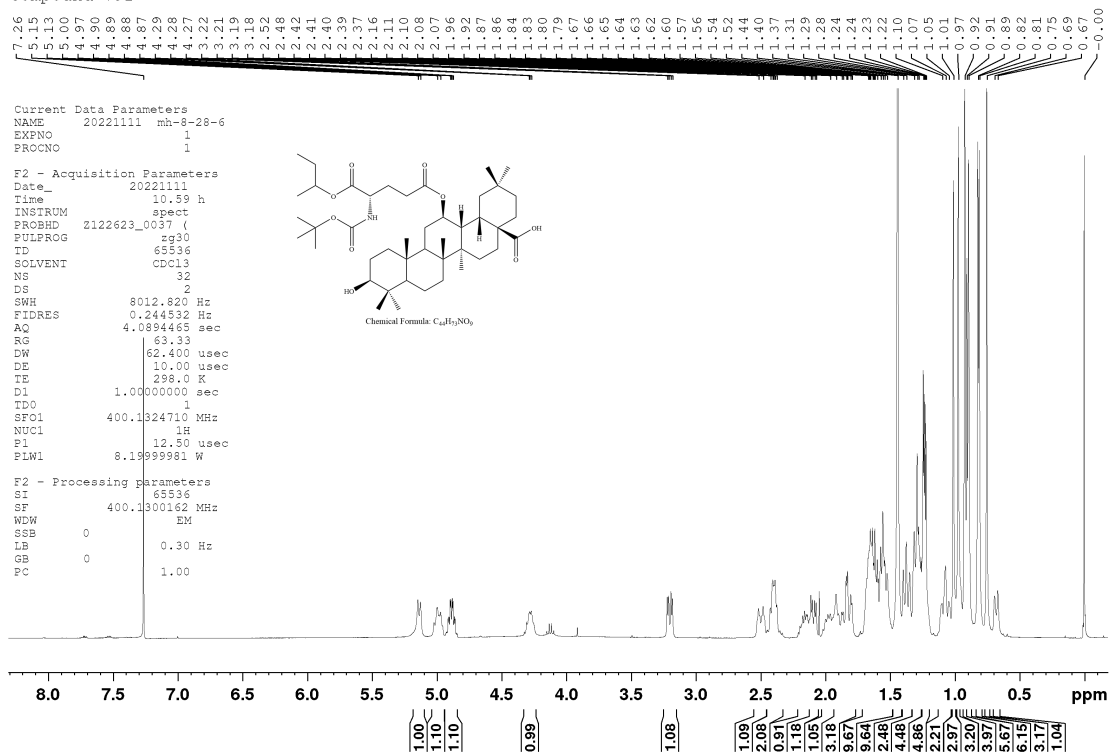Fig. S73.  $^1\text{H}$  NMR of compound 20f

Compound 79f

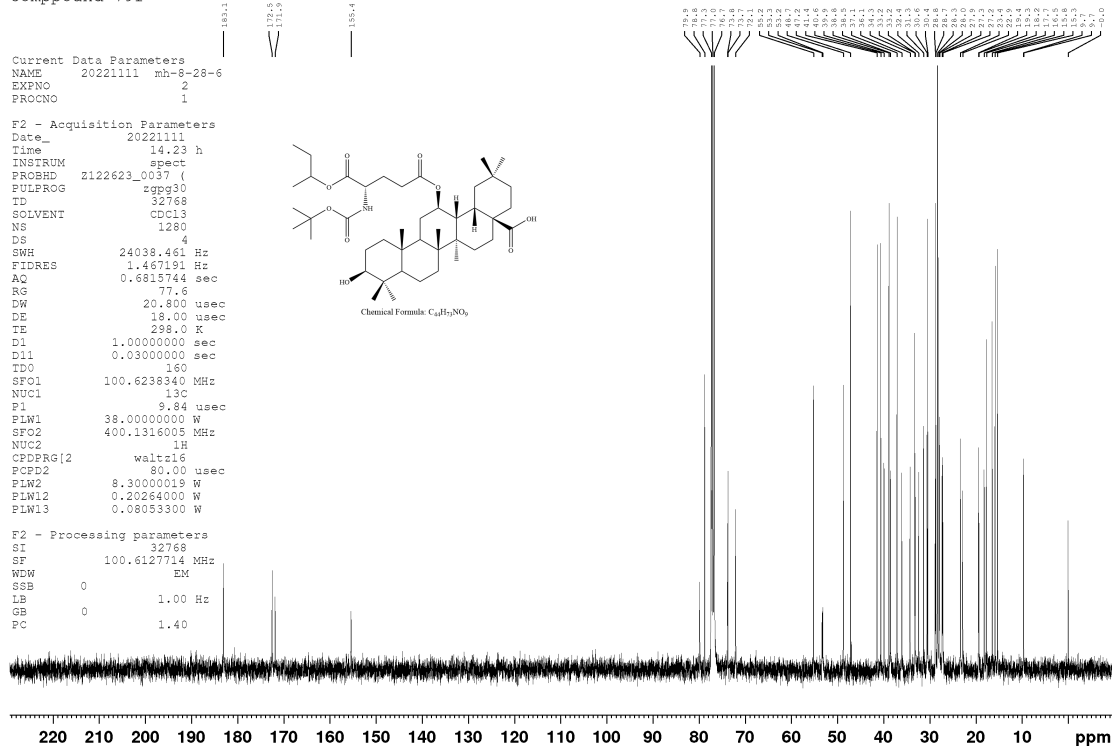Fig. S74.  $^{13}\text{C}$  NMR of compound 20f

Compound 79g

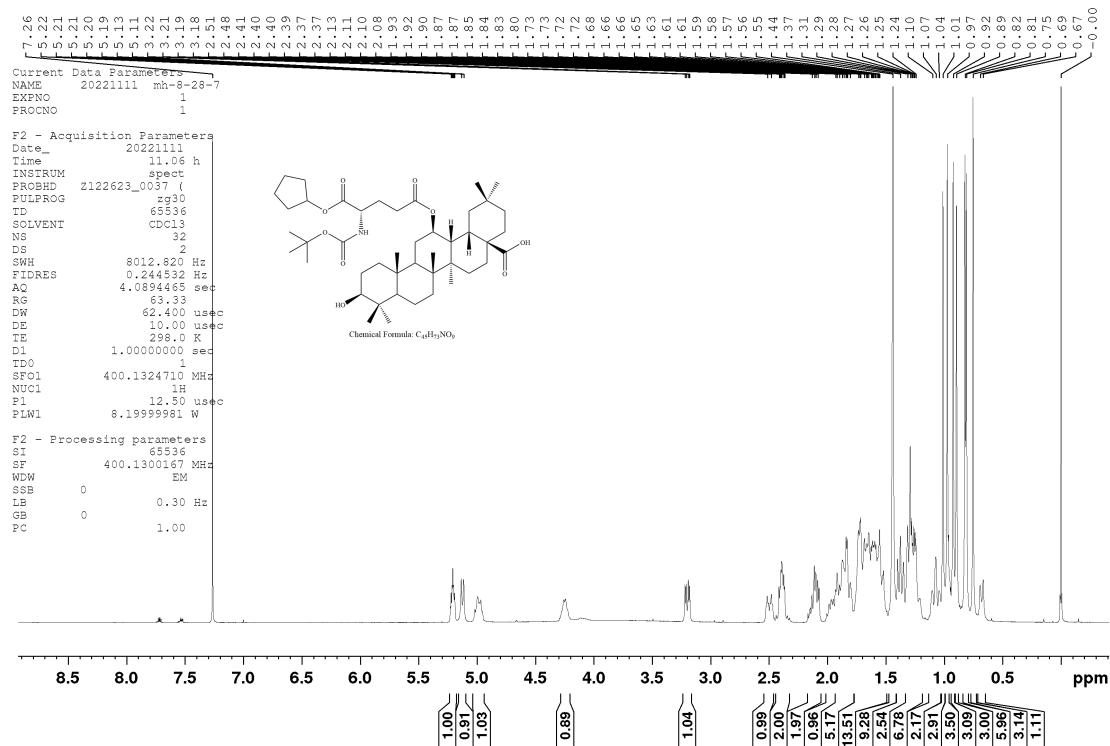Fig. S75.  $^1\text{H}$  NMR of compound 20g

Compound 79g

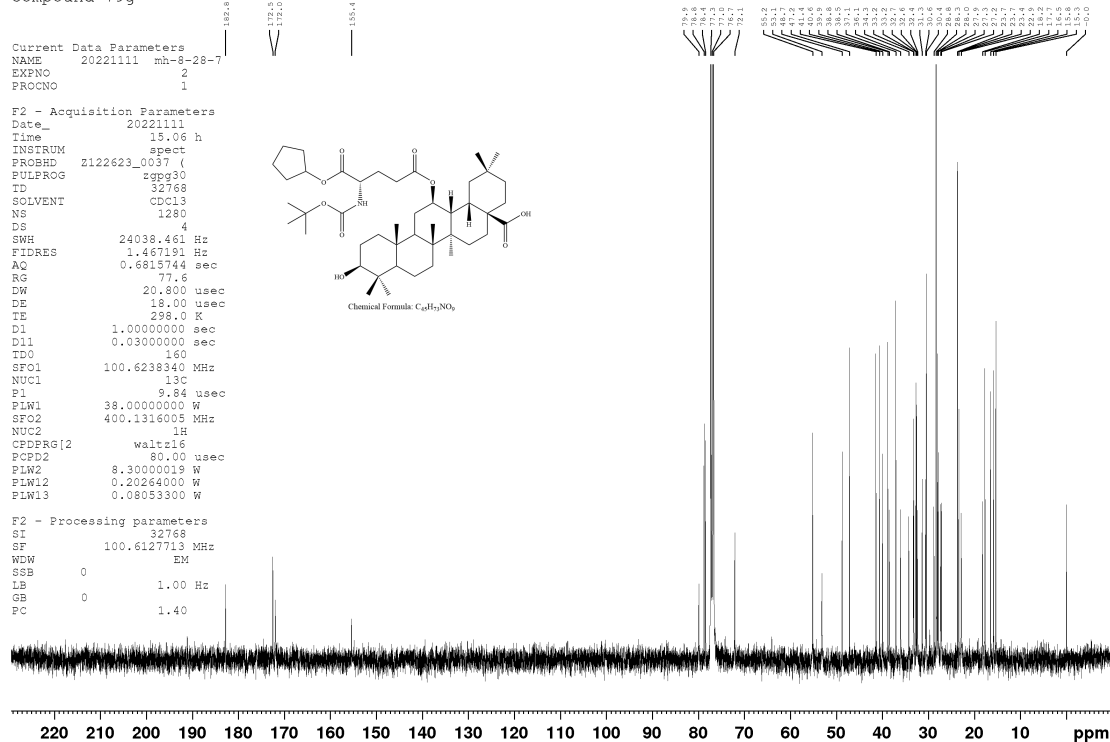Fig. S76.  $^{13}\text{C}$  NMR of compound 20g

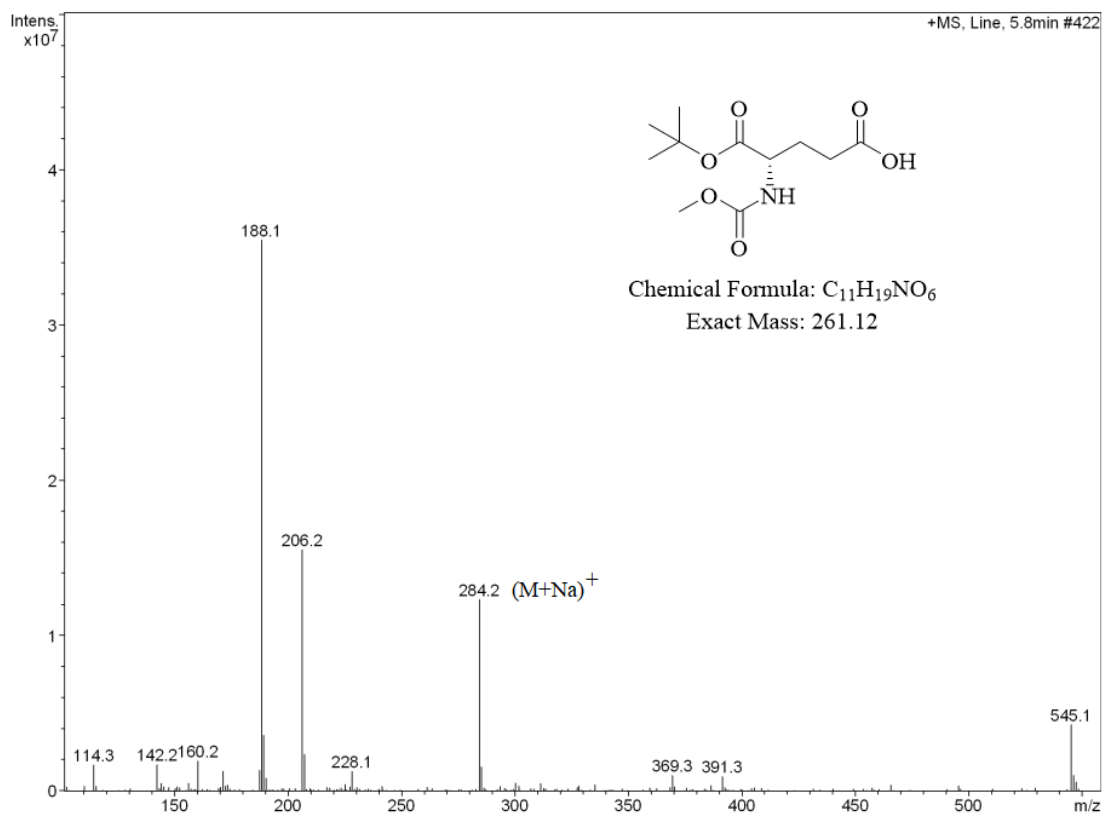

**Fig. S77.** MS of intermediate **14a**

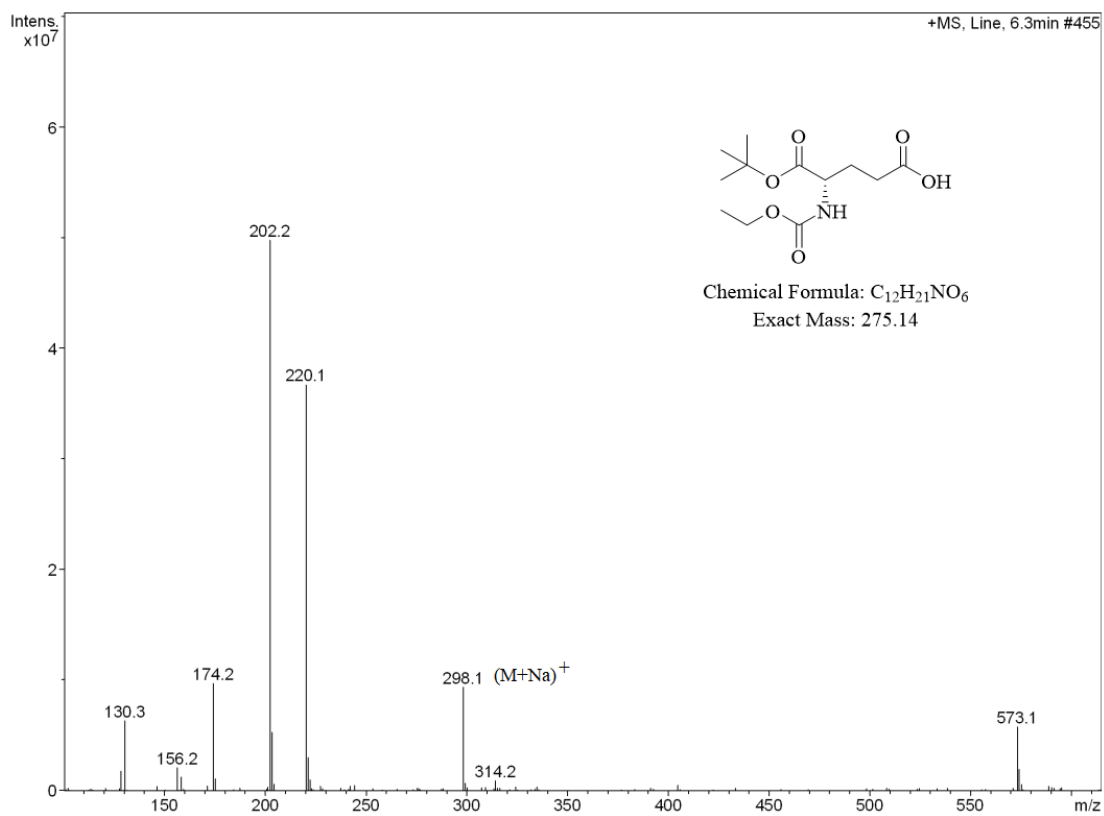

**Fig. S78.** MS of intermediate **14b**

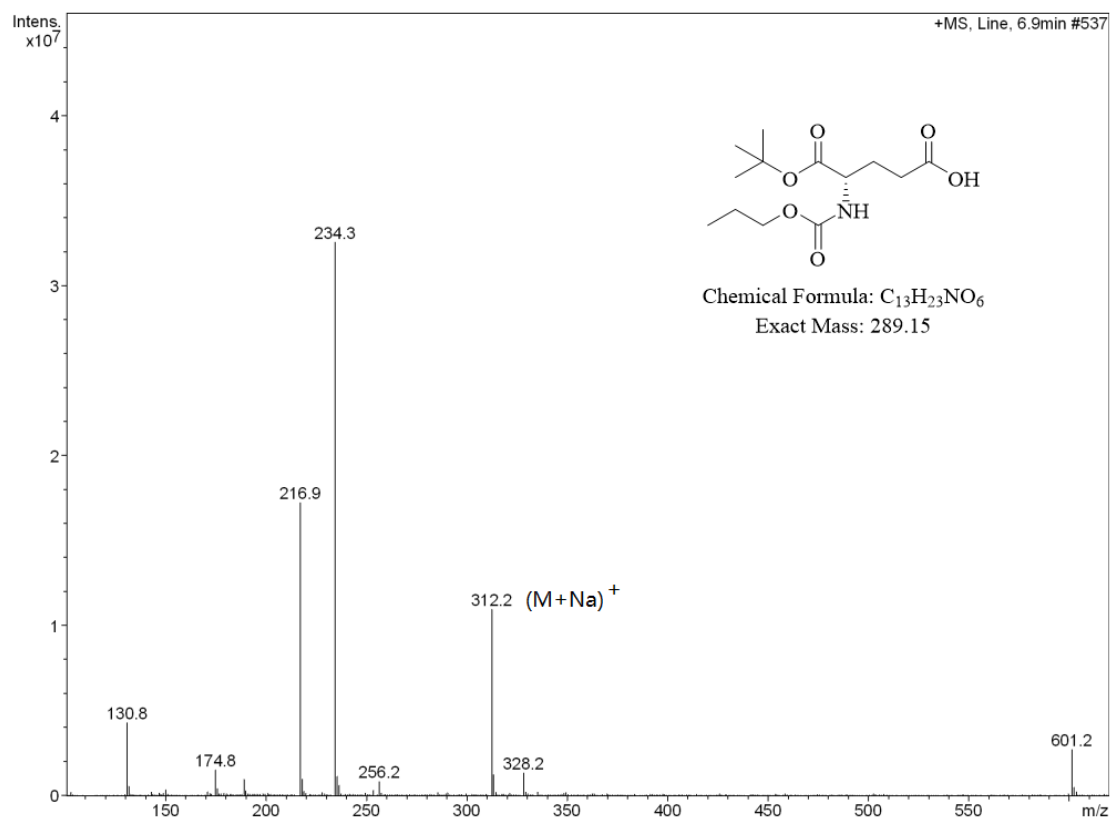

**Fig. S79.** MS of intermediate 14c

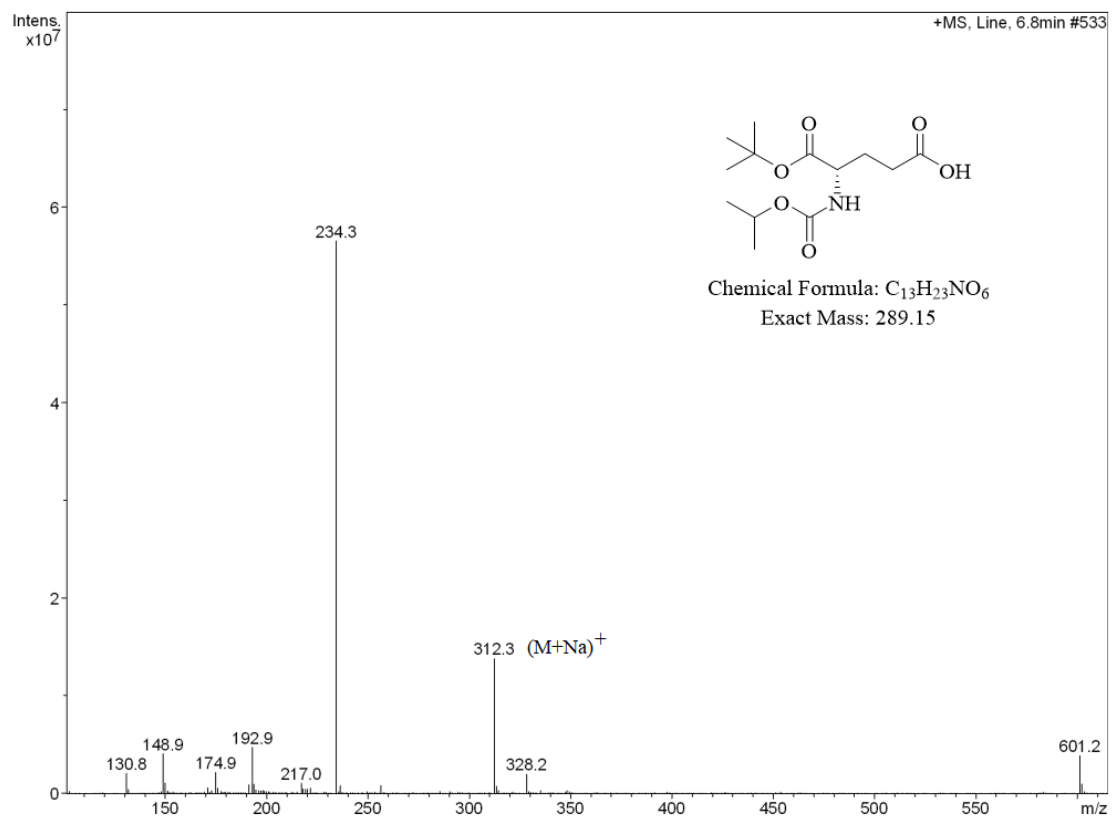

**Fig. S80.** MS of intermediate 14d

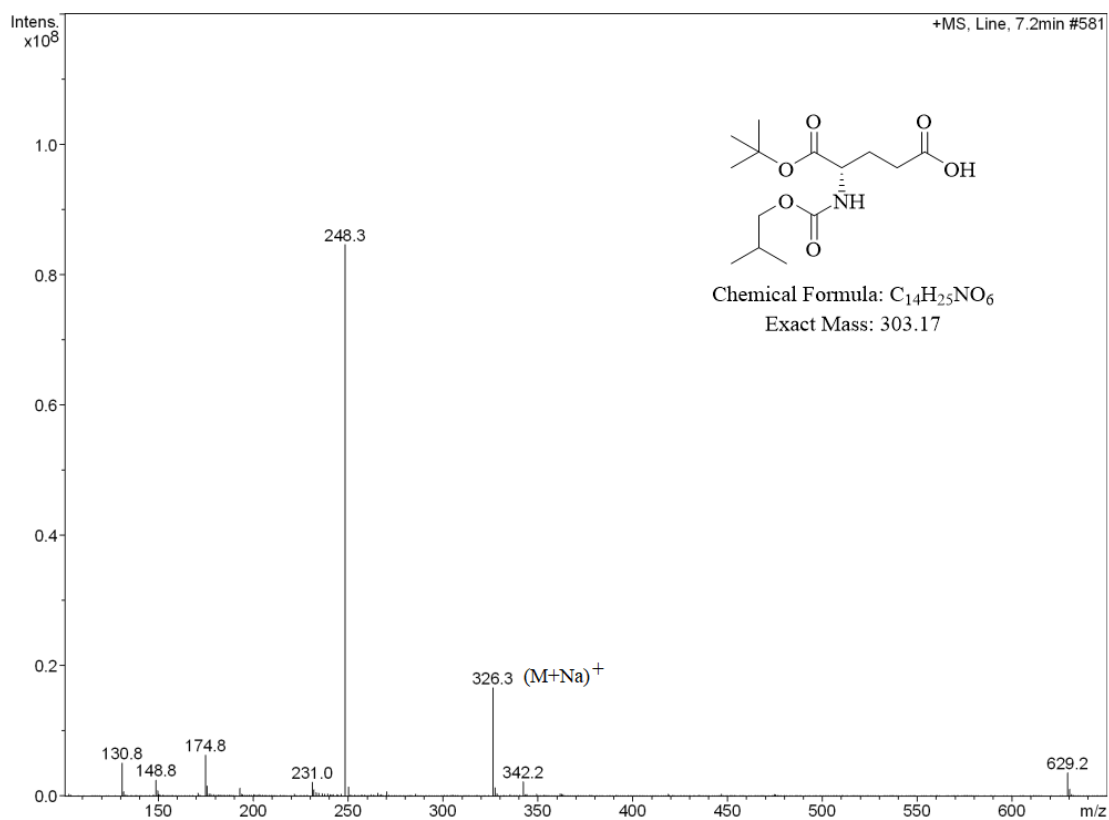

**Fig. S81.** MS of intermediate **14e**

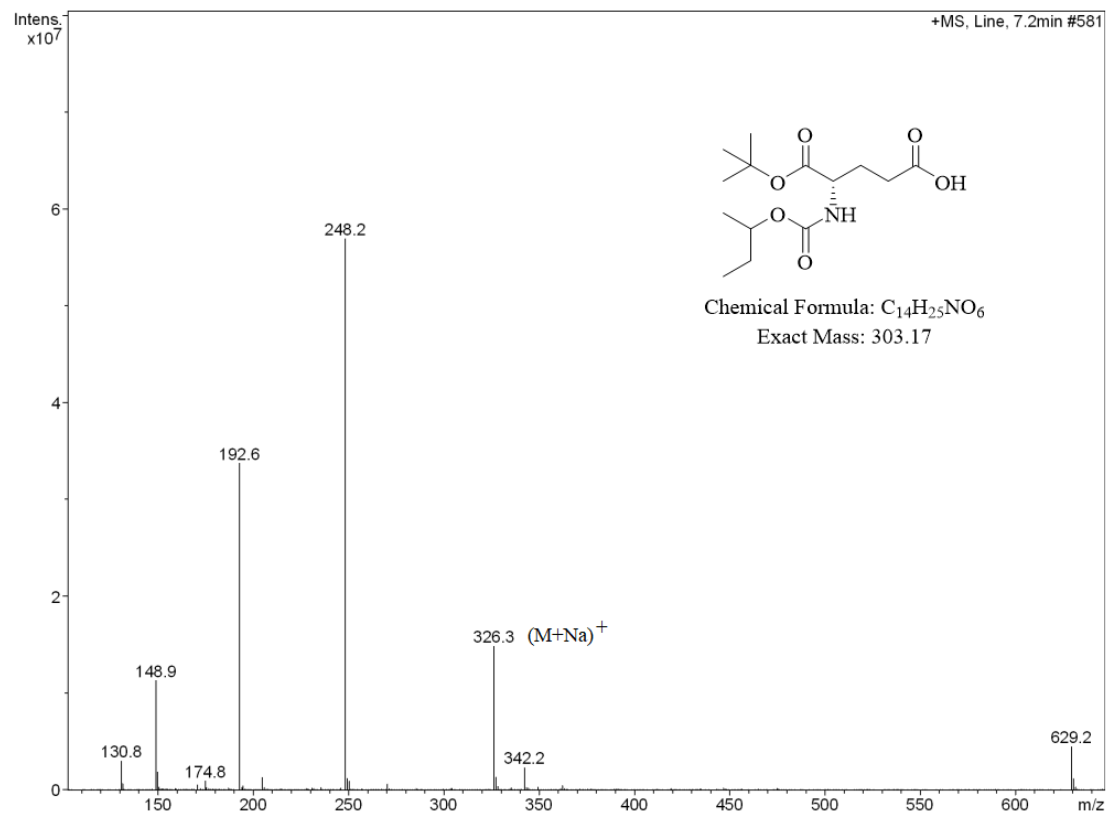

**Fig. S82.** MS of intermediate **14f**

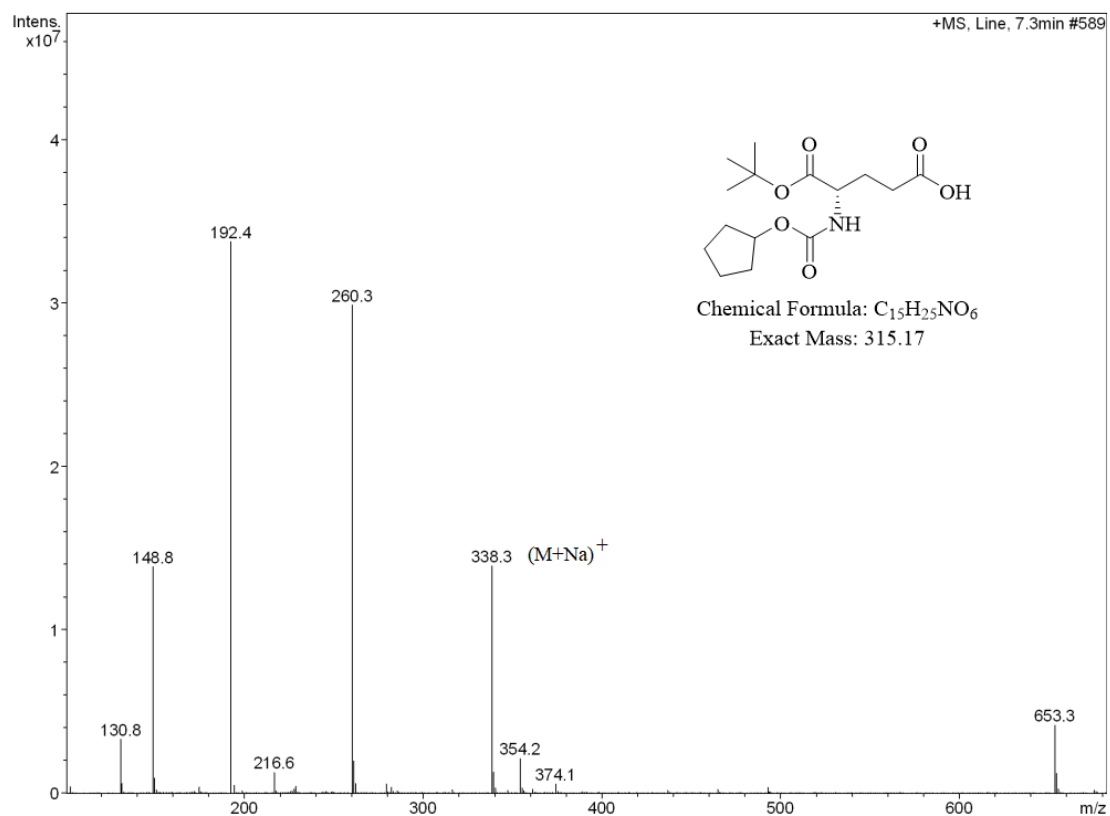

**Fig. S83.** MS of intermediate **14g**

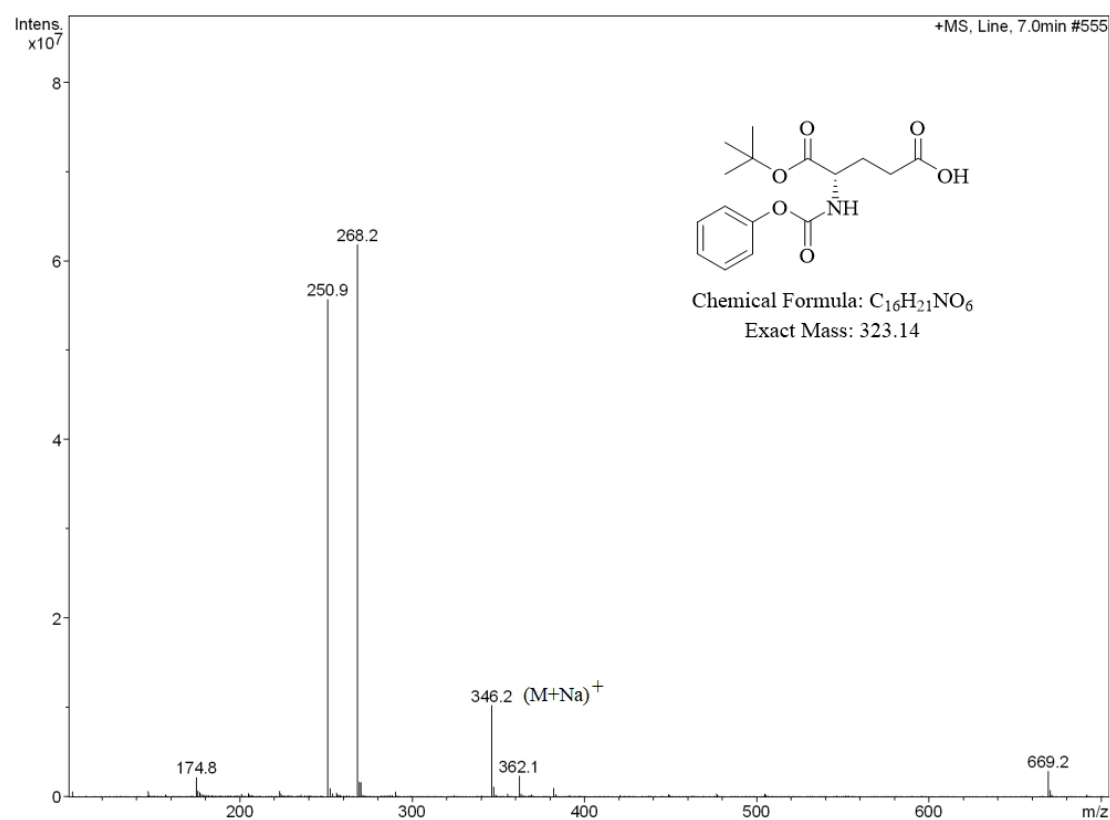

**Fig. S84.** MS of intermediate **14h**

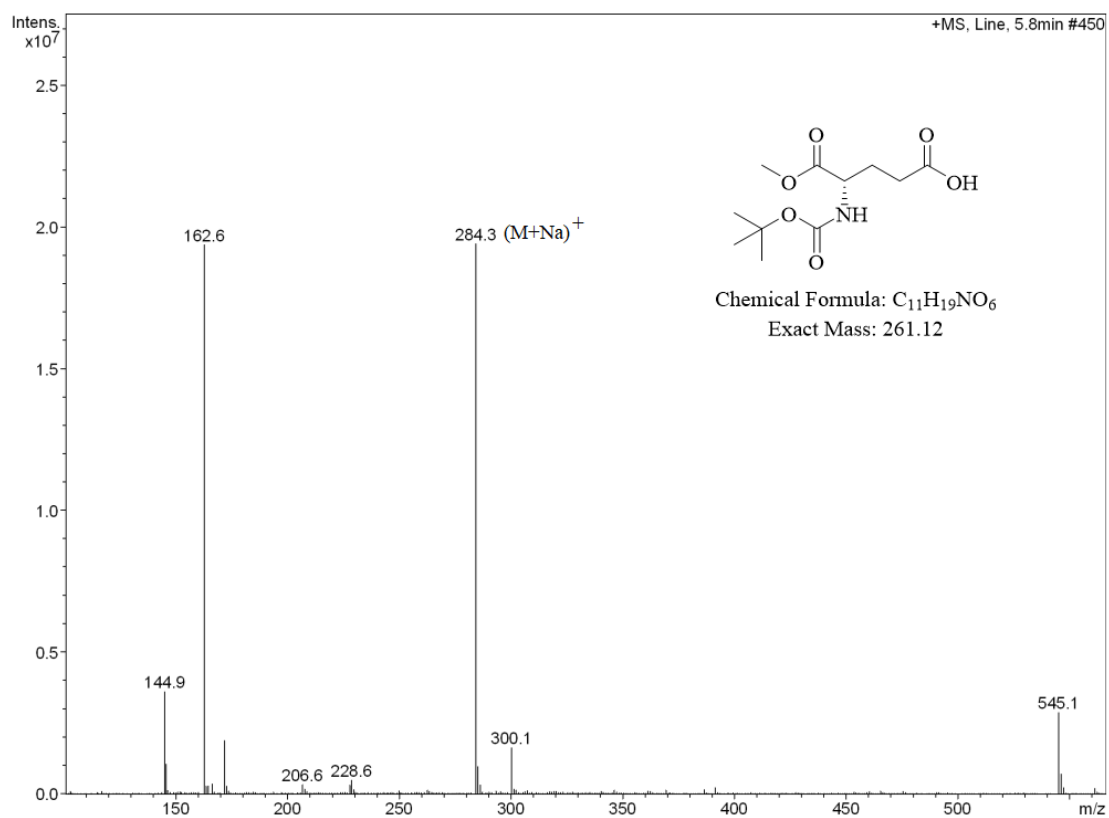

**Fig. S85.** MS of intermediate **18a**

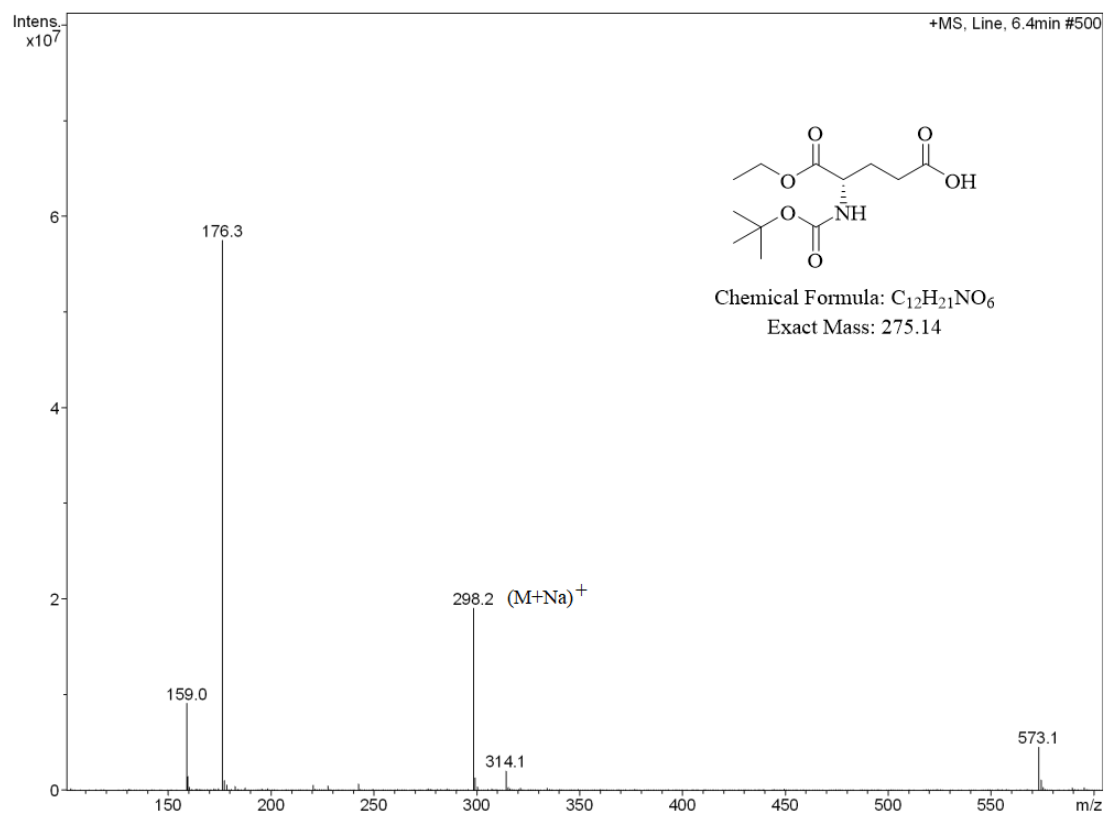

**Fig. S86.** MS of intermediate **18b**

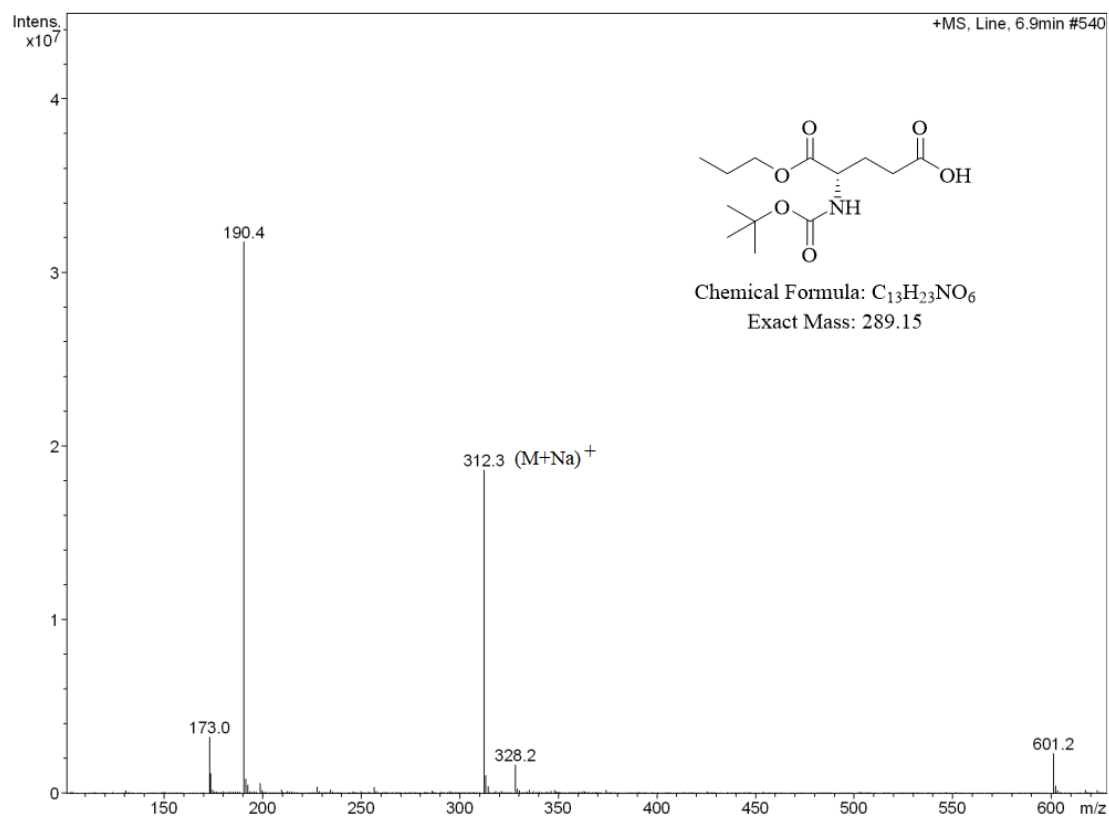

**Fig. S87.** MS of intermediate **18c**

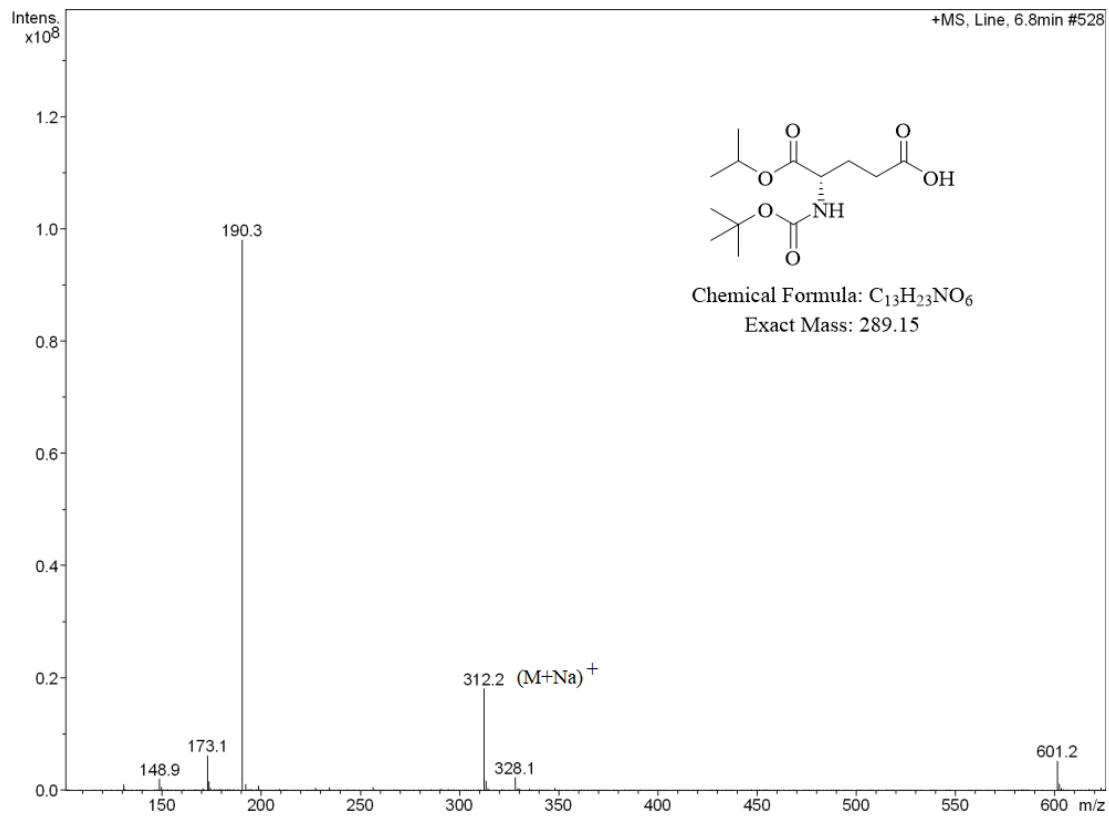

**Fig. S88.** MS of intermediate **18d**

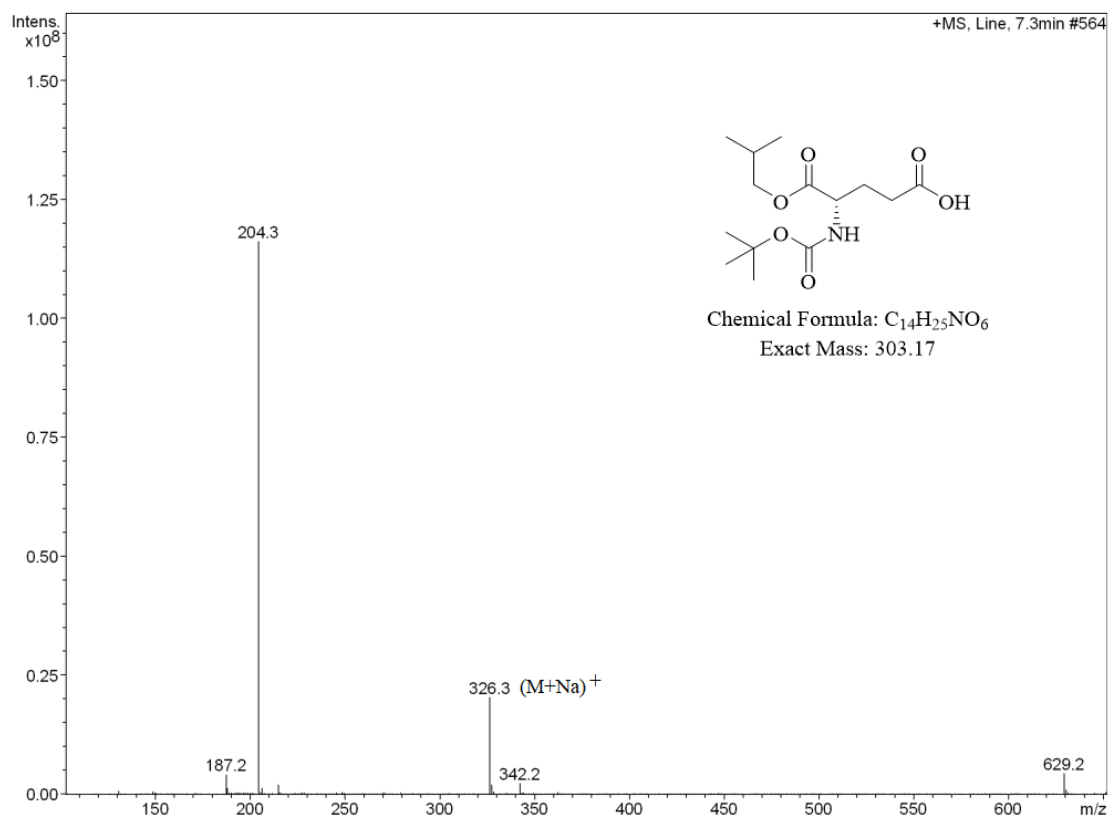

**Fig. S89.** MS of intermediate **18e**

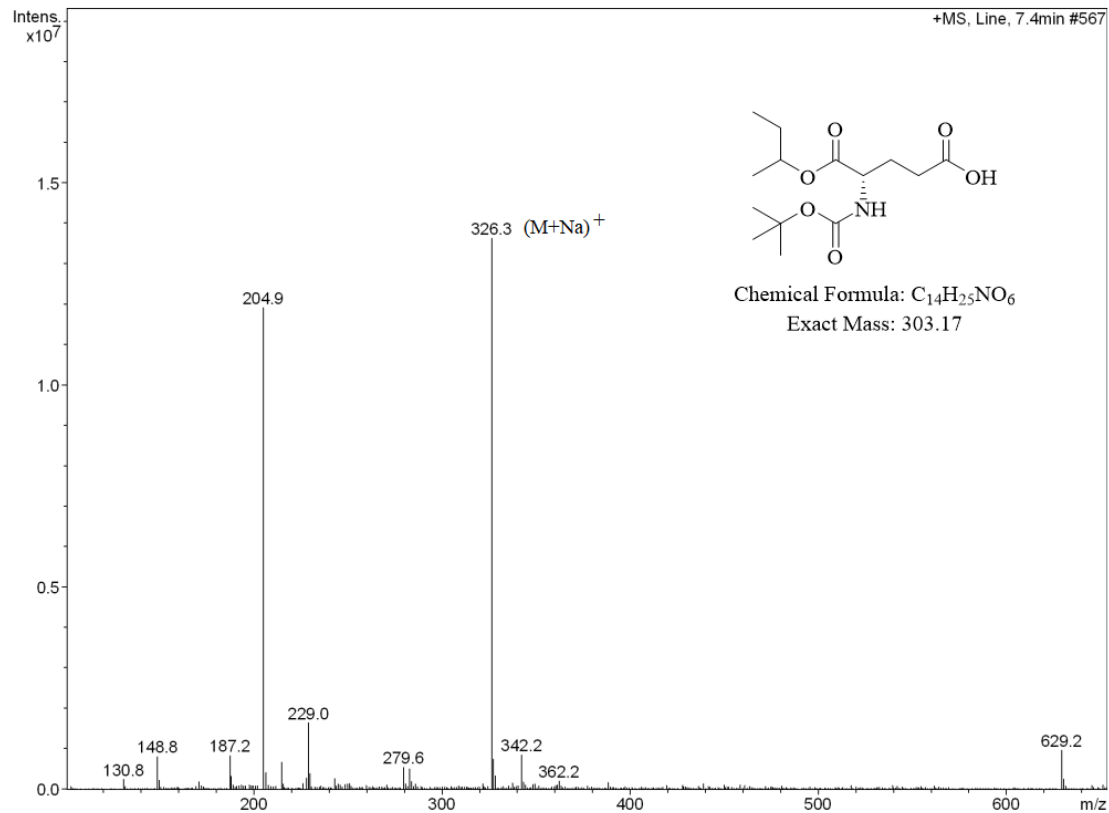

**Fig. S90.** MS of intermediate **18f**

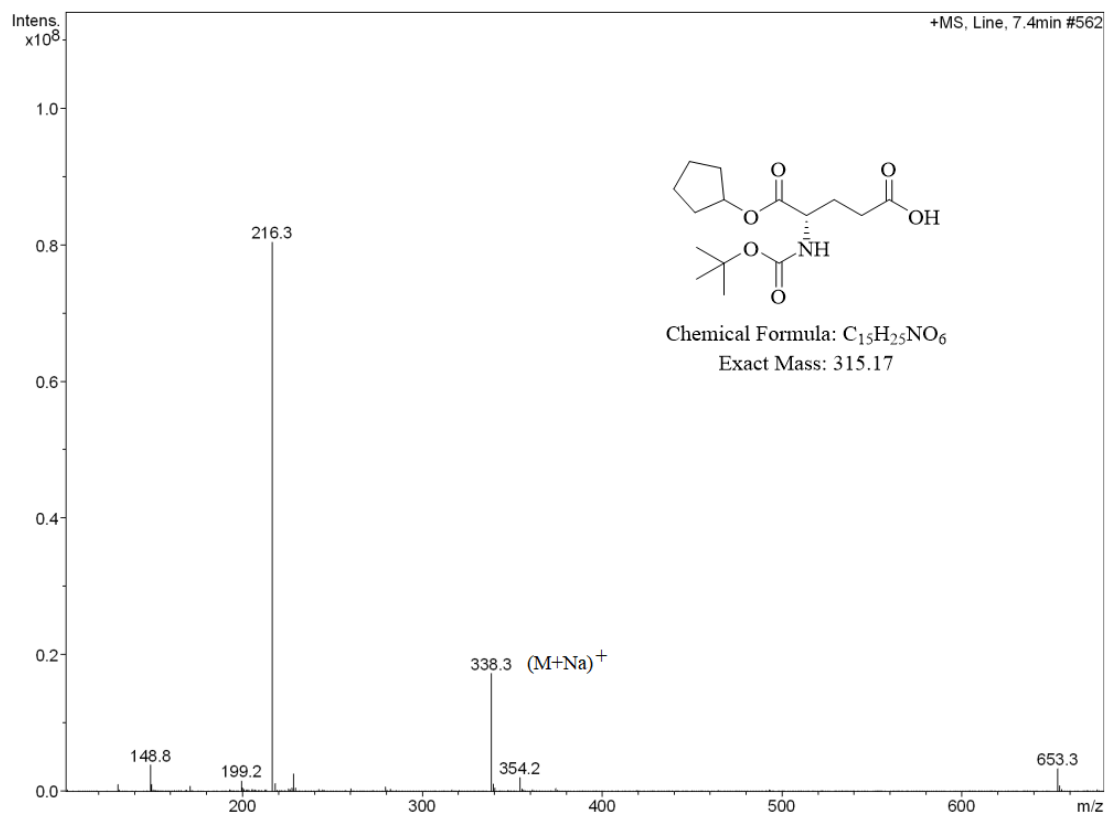

**Fig. S91.** MS of intermediate **18g**

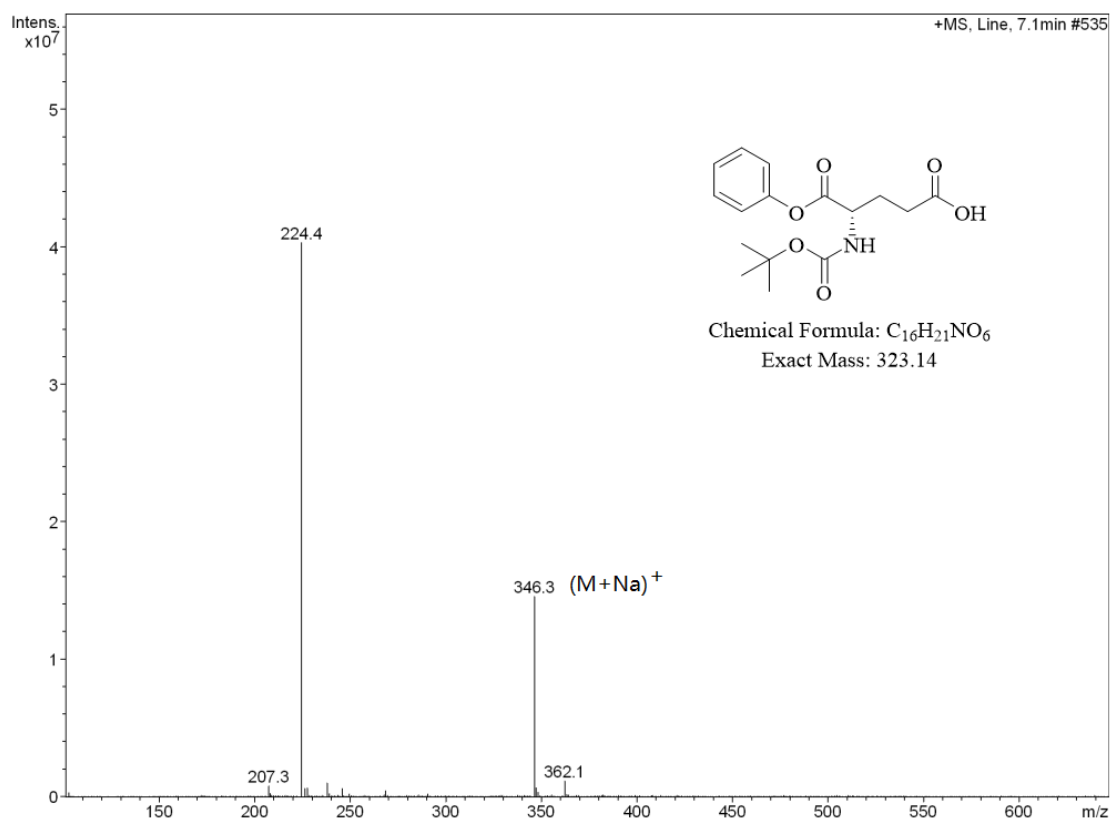

**Fig. S92.** MS of intermediate **18h**

12B-OHOA #1341 RT: 13.44 AV: 1 NL: 4.16E7  
T: FTMS + p ESI Full ms [100.0000-1500.0000]

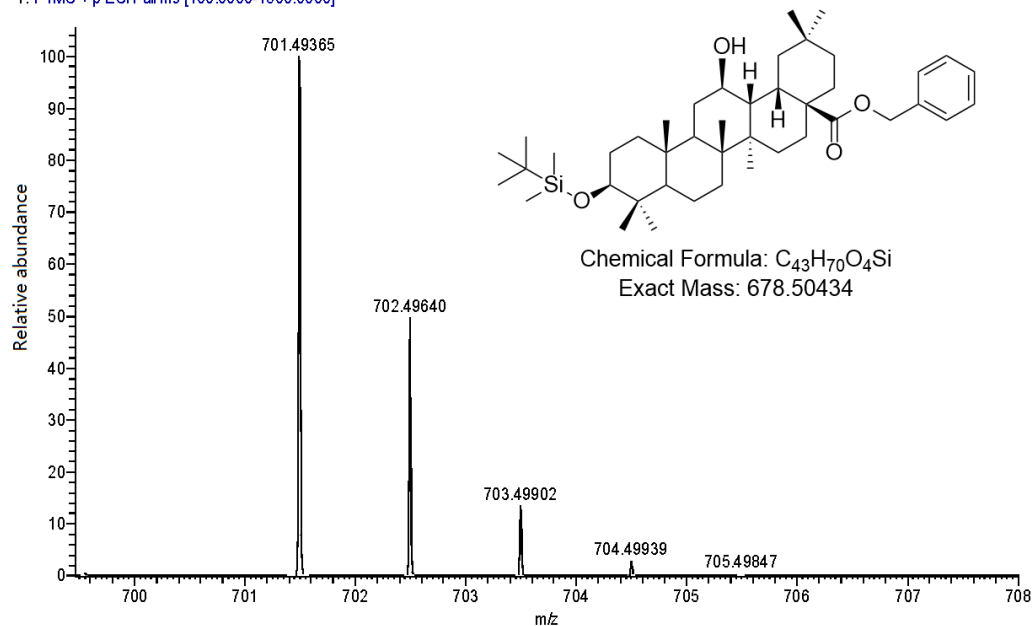

| m/z       | Theo. Mass | Delta (ppm) | RDB equiv. | Composition      |      |
|-----------|------------|-------------|------------|------------------|------|
| 701.49365 | 701.49356  | 0.092       | 9.5        | C43 H70 O4 Na Si | M+Na |

**Fig. S93.** HRMS of compound **8**

mh-8-17-S #901 RT: 8.85 AV: 1 NL: 4.92E8  
T: FTMS + p ESI Full ms [100.0000-1500.0000]

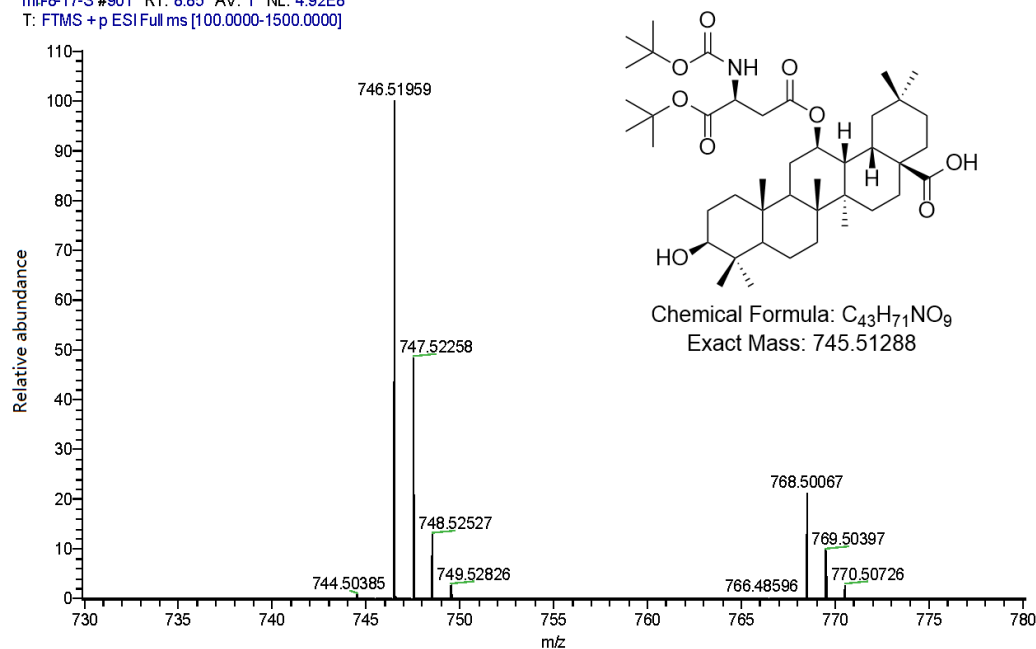

| m/z       | Theo. Mass | Delta (ppm) | RDB equiv. | Composition  |     |
|-----------|------------|-------------|------------|--------------|-----|
| 746.51959 | 746.52016  | -0.569      | 8.5        | C43 H72 O9 N | M+H |

**Fig. S94.** HRMS of compound **9a**

mh-8-17-R #901 RT: 8.84 AV: 1 NL: 4.31E8  
T: FTMS + p ESI Full ms [100.0000-1500.0000]

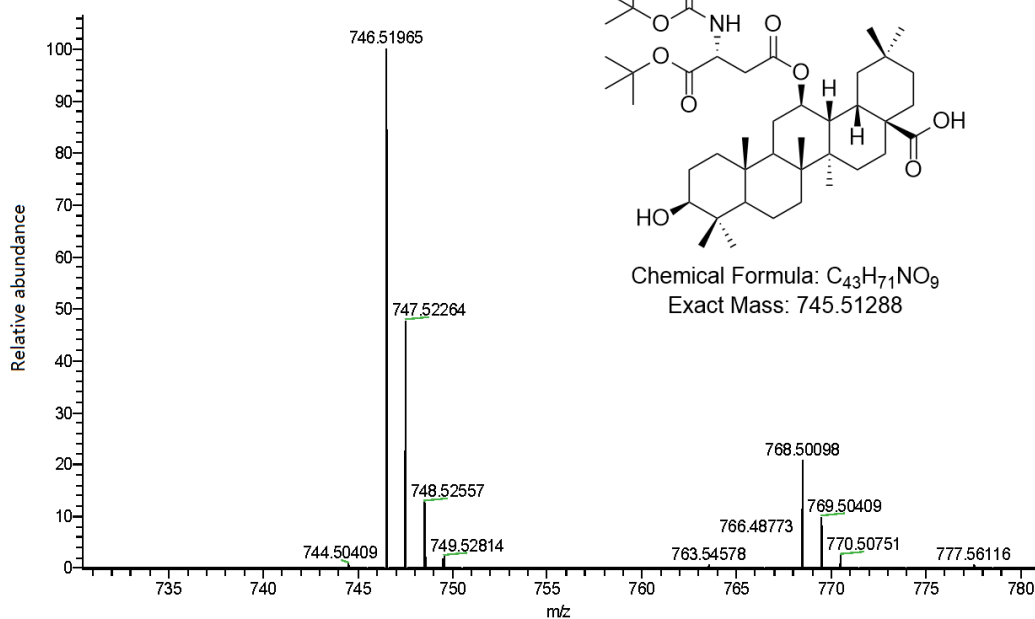

| m/z       | Theo. Mass | Delta (ppm) | RDB equiv. | Composition  |     |
|-----------|------------|-------------|------------|--------------|-----|
| 746.51965 | 746.52016  | -0.509      | 8.5        | C43 H72 O9 N | M+H |

Fig. S95. HRMS of compound **9b**

mh-8-15#885 RT: 8.70 AV: 1 NL: 1.04E9  
T: FTMS + p ESI Full ms [100.0000-1500.0000]

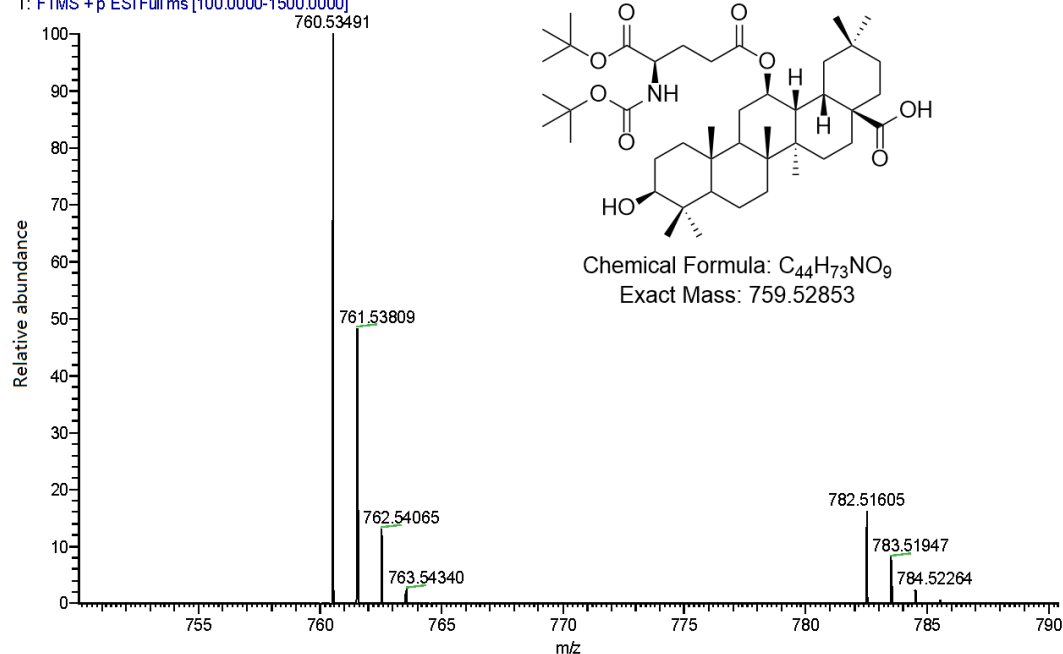

| m/z       | Theo. Mass | Delta (ppm) | RDB equiv. | Composition  |     |
|-----------|------------|-------------|------------|--------------|-----|
| 760.53491 | 760.53581  | -0.899      | 8.5        | C44 H74 O9 N | M+H |

Fig. S96. HRMS of compound **10a**

YMY-3-46 #883 RT: 8.68 AV: 1 NL: 9.84E8  
T: FTMS + p ESI Full ms [100.0000-1500.0000]

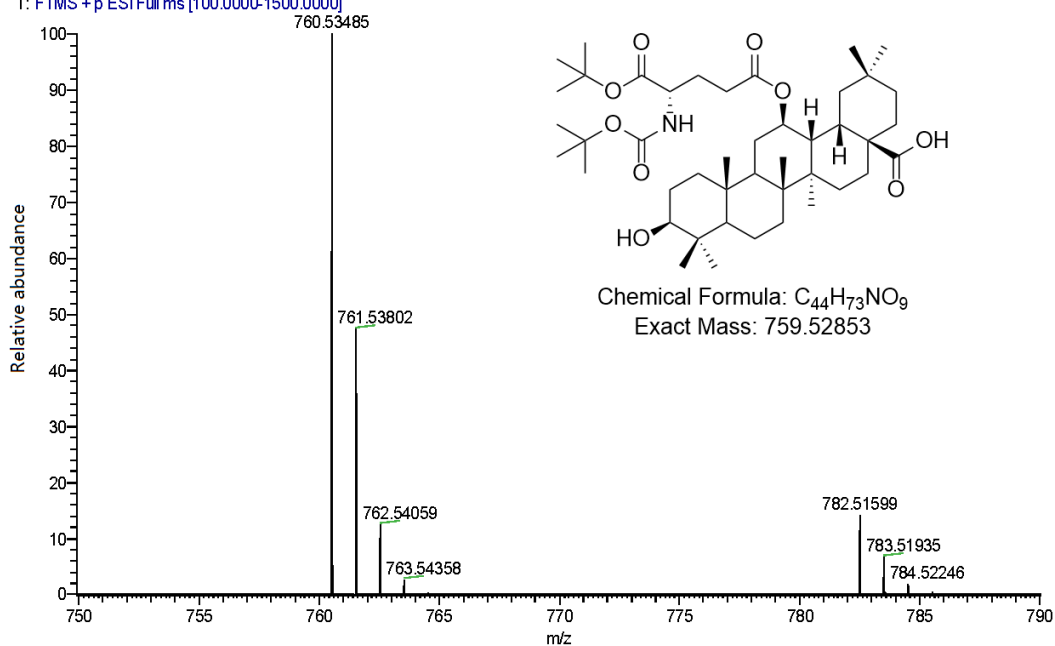

| m/z       | Theo. Mass | Delta (ppm) | RDB equiv. | Composition                                      |     |
|-----------|------------|-------------|------------|--------------------------------------------------|-----|
| 760.53485 | 760.53581  | -0.959      | 8.5        | C <sub>44</sub> H <sub>74</sub> O <sub>9</sub> N | M+H |

Fig. S97. HRMS of compound 10b

mh-8-19 #891 RT: 8.75 AV: 1 NL: 8.12E8  
T: FTMS + p ESI Full ms [100.0000-1500.0000]

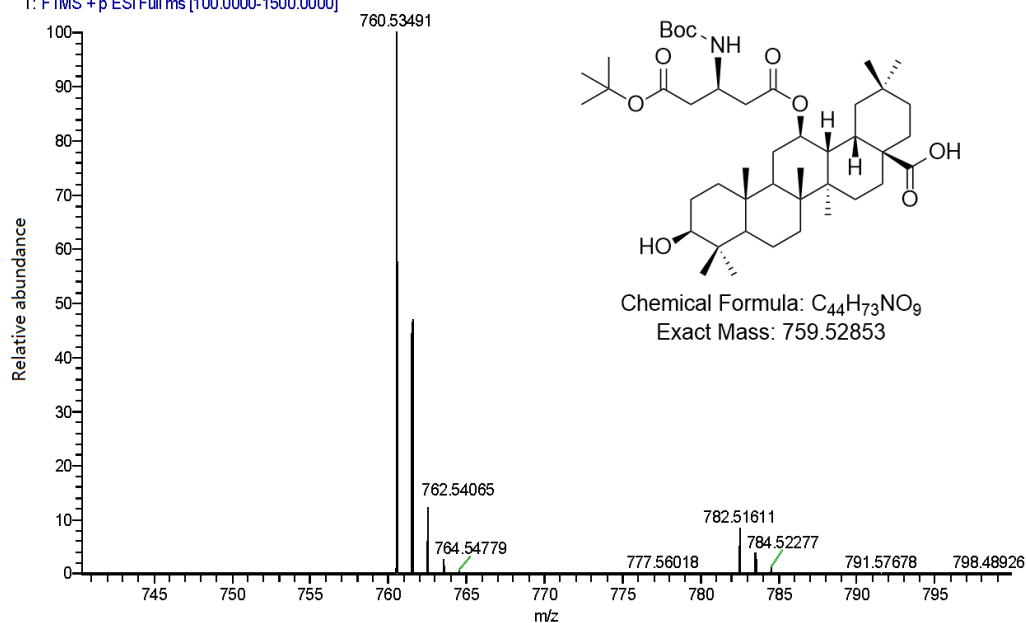

| m/z       | Theo. Mass | Delta (ppm) | RDB equiv. | Composition                                      |     |
|-----------|------------|-------------|------------|--------------------------------------------------|-----|
| 760.53491 | 760.53581  | -0.899      | 8.5        | C <sub>44</sub> H <sub>74</sub> O <sub>9</sub> N | M+H |

Fig. S98. HRMS of compound 10c

mh-8-16 #887 RT: 8.72 AV: 1 NL: 6.60E8  
T: FTMS + p ESI Full ms [100.0000-1500.0000]

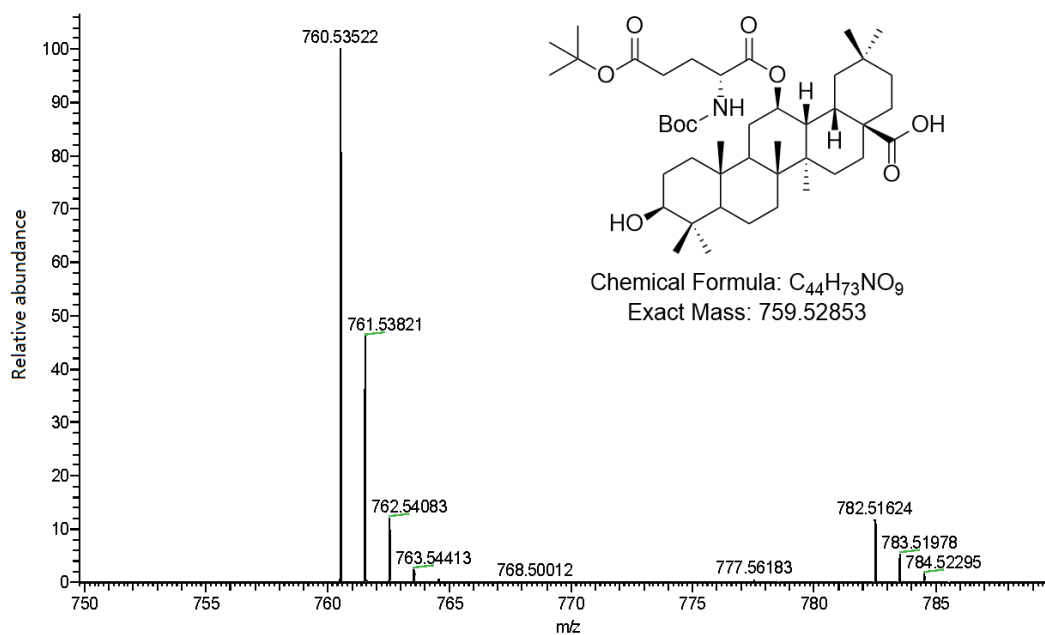

| m/z       | Theo. Mass | Delta (ppm) | RDB equiv. | Composition  |     |
|-----------|------------|-------------|------------|--------------|-----|
| 760.53522 | 760.53581  | -0.589      | 8.5        | C44 H74 O9 N | M+H |

Fig. S99. HRMS of compound 10d

mh-8-5 #883 RT: 8.68 AV: 1 NL: 8.70E8  
T: FTMS + p ESI Full ms [100.0000-1500.0000]

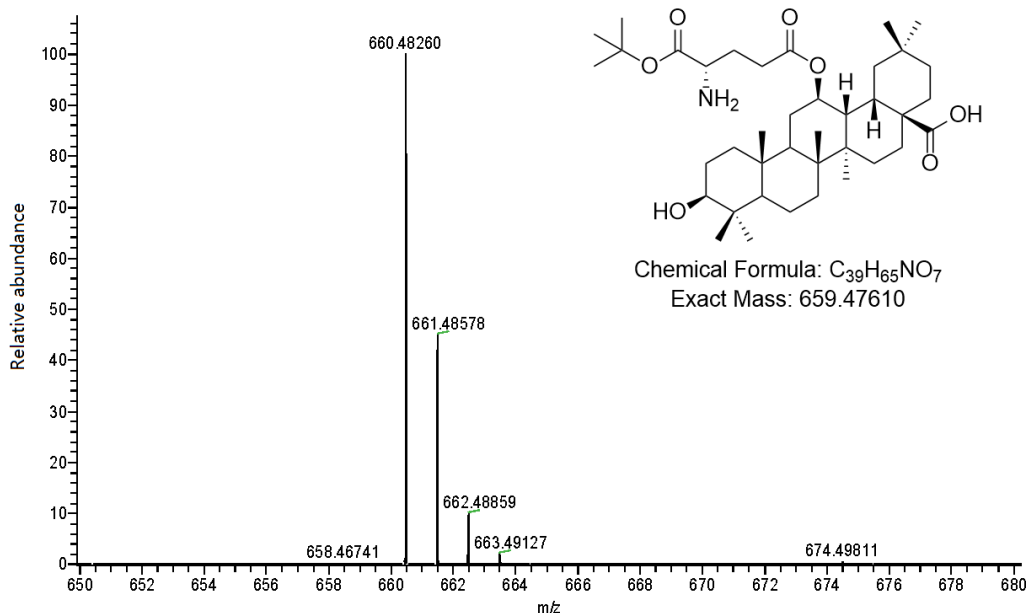

| m/z       | Theo. Mass | Delta (ppm) | RDB equiv. | Composition  |     |
|-----------|------------|-------------|------------|--------------|-----|
| 660.48260 | 660.48338  | -0.78       | 7.5        | C39 H66 O7 N | M+H |

Fig. S100. HRMS of compound 11a

mh-8-1 #901 RT: 8.83 AV: 1 NL: 1.95E8  
T: FTMS + p ESI Full ms [100.0000-1500.0000]

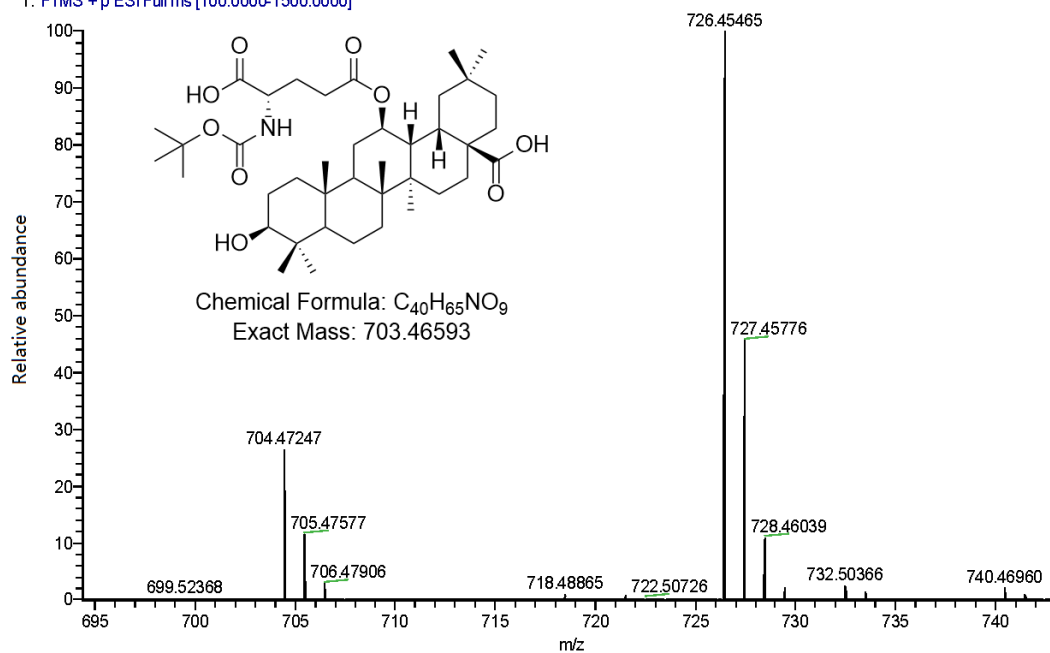

| m/z       | Theo. Mass | Delta (ppm) | RDB equiv. | Composition     |      |
|-----------|------------|-------------|------------|-----------------|------|
| 726.45465 | 726.45515  | -0.504      | 8.5        | C40 H65 O9 N Na | M+Na |

Fig. S101. HRMS of compound 11b

mh-8-8 #795 RT: 7.91 AV: 1 NL: 6.19E8  
T: FTMS + p ESI Full ms [100.0000-1500.0000]

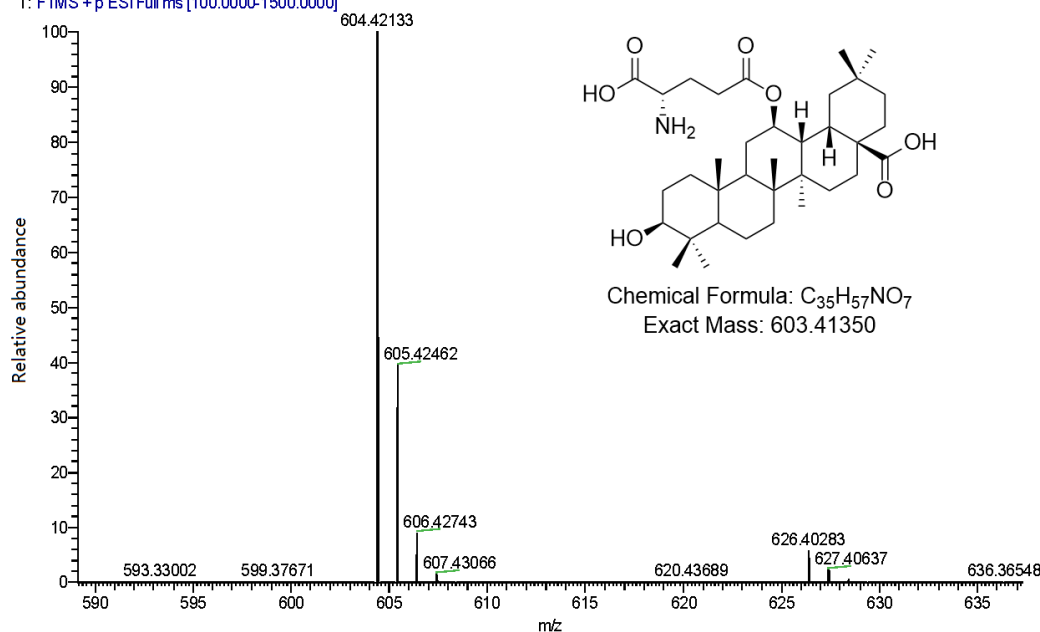

| m/z       | Theo. Mass | Delta (ppm) | RDB equiv. | Composition  |     |
|-----------|------------|-------------|------------|--------------|-----|
| 604.42133 | 604.42078  | 0.55        | 7.5        | C35 H58 O7 N | M+H |

Fig. S102. HRMS of compound 11c

mh-8-27-2 #851 RT: 8.50 AV: 1 NL: 8.66E8  
T: FTMS + p ESI Full ms [100.0000-1500.0000]

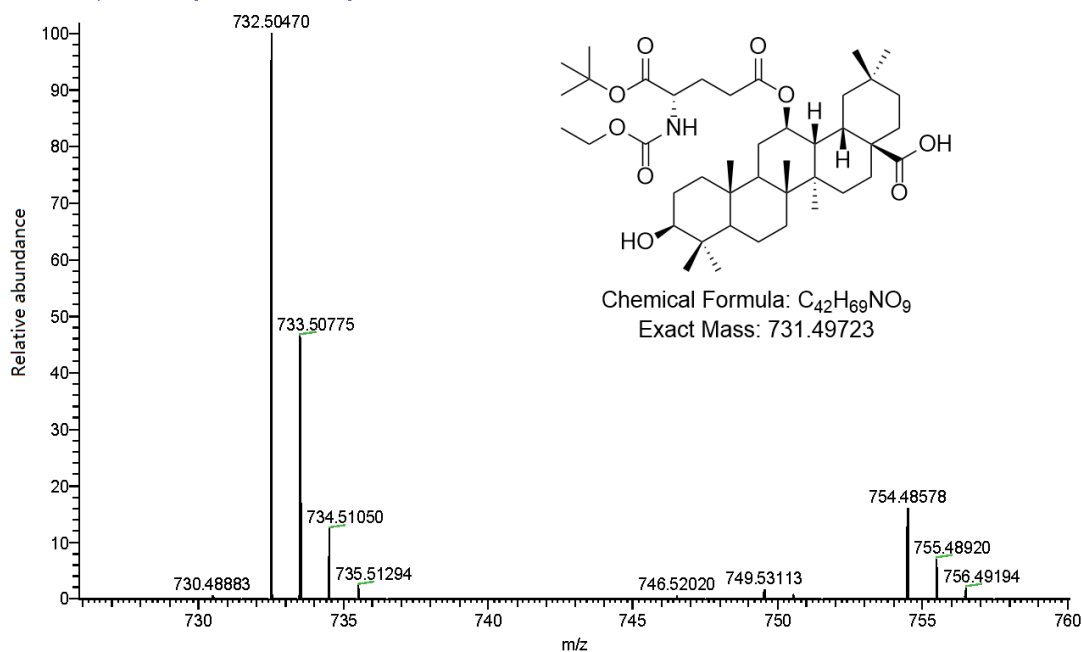

| m/z       | Theo. Mass | Delta (ppm) | RDB equiv. | Composition  |     |
|-----------|------------|-------------|------------|--------------|-----|
| 732.50470 | 732.50451  | 0.191       | 8.5        | C42 H70 O9 N | M+H |

Fig. S103. HRMS of compound **19b**

mh-8-27-3 #859 RT: 8.51 AV: 1 NL: 1.04E9  
T: FTMS + p ESI Full ms [100.0000-1500.0000]

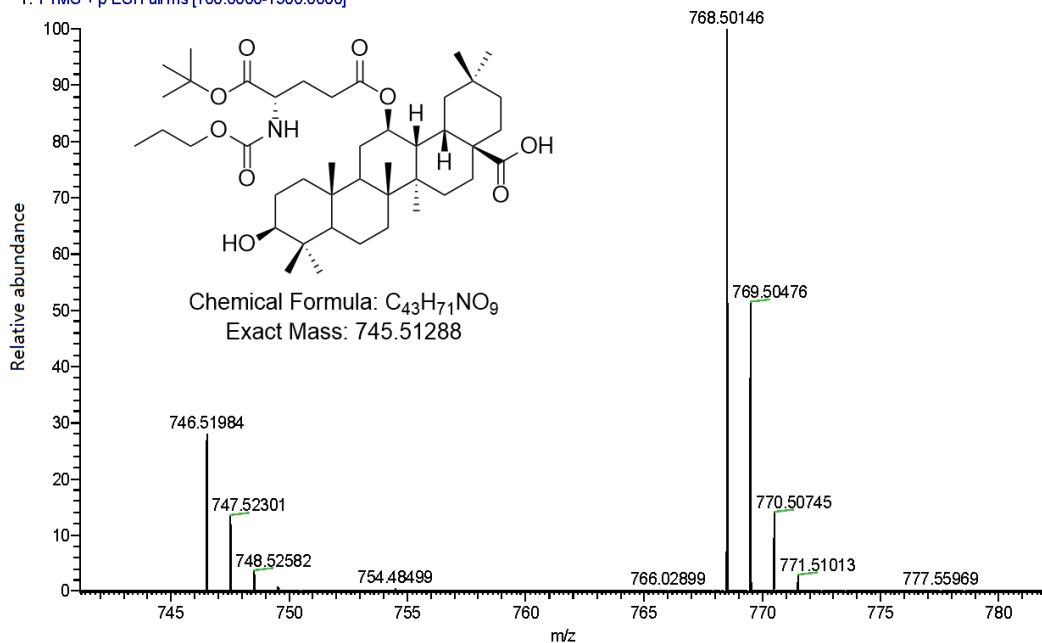

| m/z       | Theo. Mass | Delta (ppm) | RDB equiv. | Composition     |      |
|-----------|------------|-------------|------------|-----------------|------|
| 768.50146 | 768.50210  | -0.644      | 8.5        | C43 H71 O9 N Na | M+Na |

Fig. S104. HRMS of compound **19c**

mh-8-27-4 #863 RT: 8.56 AV: 1 NL: 4.33E8  
T: FTMS + p ESI Full ms [100.0000-1500.0000]

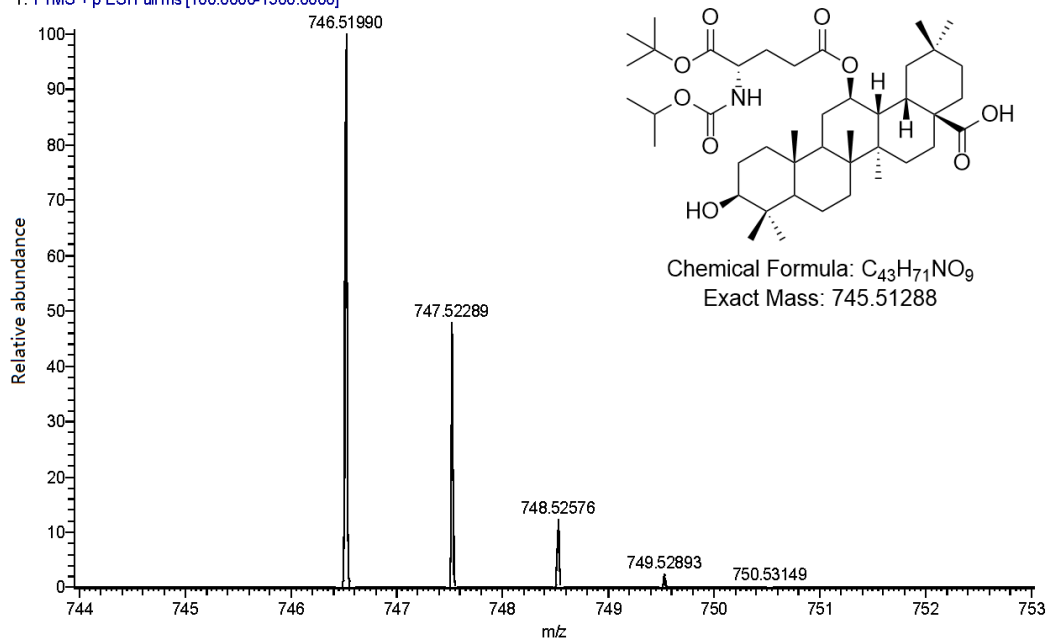

| m/z       | Theo. Mass | Delta (ppm) | RDB equiv. | Composition  |     |
|-----------|------------|-------------|------------|--------------|-----|
| 746.51990 | 746.52016  | -0.259      | 8.5        | C43 H72 O9 N | M+H |

Fig. S105. HRMS of compound 19d

mh-8-27-5 #865 RT: 8.63 AV: 1 NL: 9.15E8  
T: FTMS + p ESI Full ms [100.0000-1500.0000]

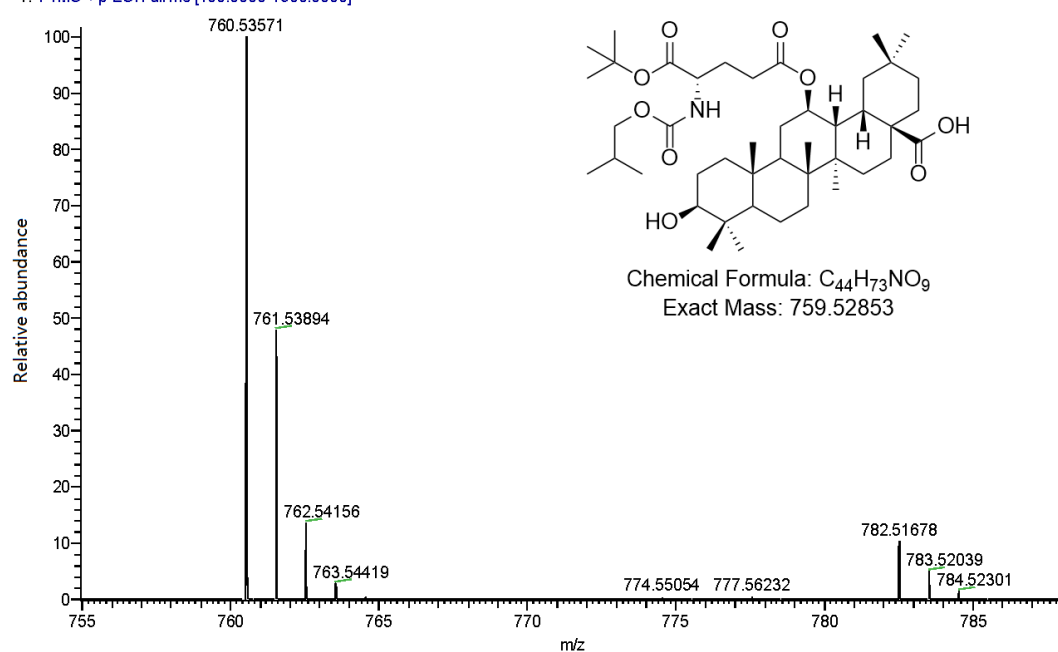

| m/z       | Theo. Mass | Delta (ppm) | RDB equiv. | Composition  |     |
|-----------|------------|-------------|------------|--------------|-----|
| 760.53571 | 760.53581  | -0.099      | 8.5        | C44 H74 O9 N | M+H |

Fig. S106. HRMS of compound 19e

mh-8-27-6 #875 RT: 8.68 AV: 1 NL: 1.43E9  
T: FTMS + p ESI Full ms [100.0000-1500.0000]

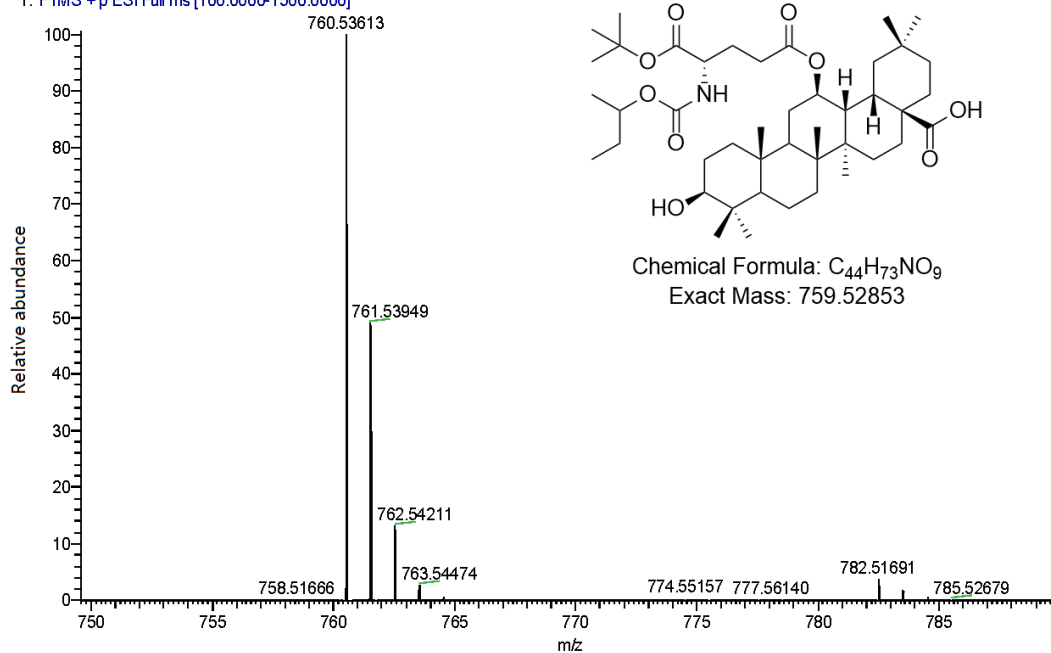

| m/z       | Theo. Mass | Delta (ppm) | RDB equiv. | Composition                                      |     |
|-----------|------------|-------------|------------|--------------------------------------------------|-----|
| 760.53613 | 760.53581  | 0.321       | 8.5        | C <sub>44</sub> H <sub>74</sub> O <sub>9</sub> N | M+H |

Fig. S107. HRMS of compound 19f

mh-8-27-7 #875 RT: 8.68 AV: 1 NL: 1.27E9  
T: FTMS + p ESI Full ms [100.0000-1500.0000]

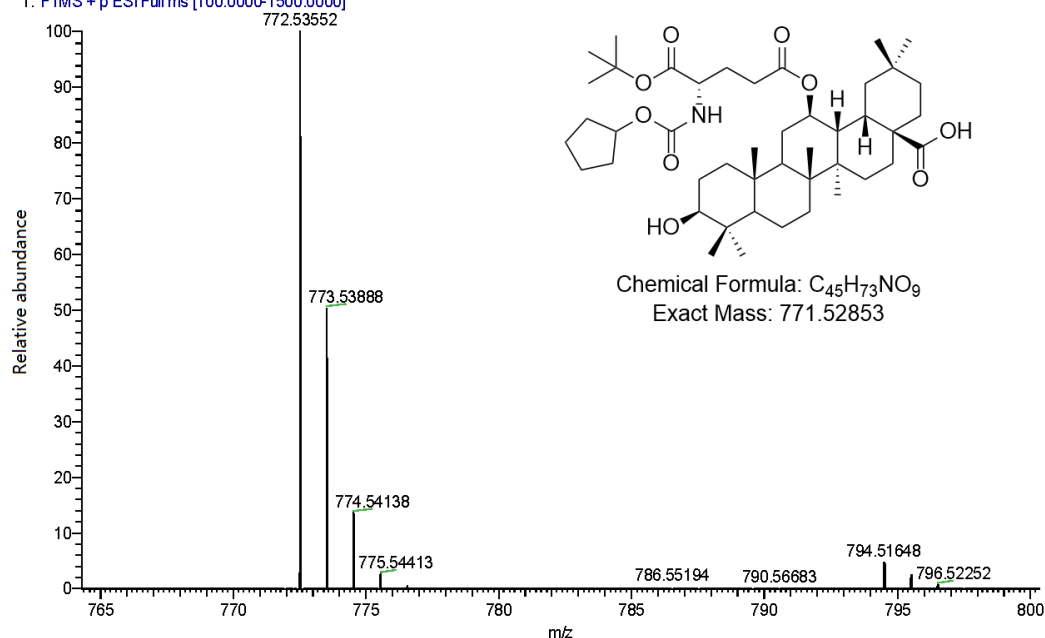

| m/z       | Theo. Mass | Delta (ppm) | RDB equiv. | Composition                                      |     |
|-----------|------------|-------------|------------|--------------------------------------------------|-----|
| 772.53552 | 772.53581  | -0.289      | 9.5        | C <sub>45</sub> H <sub>74</sub> O <sub>9</sub> N | M+H |

Fig. S108. HRMS of compound 19g

mh-8-28-1 #847 RT: 8.40 AV: 1 NL: 1.40E9  
T: FTMS + p ESI Full ms [100.0000-1500.0000]

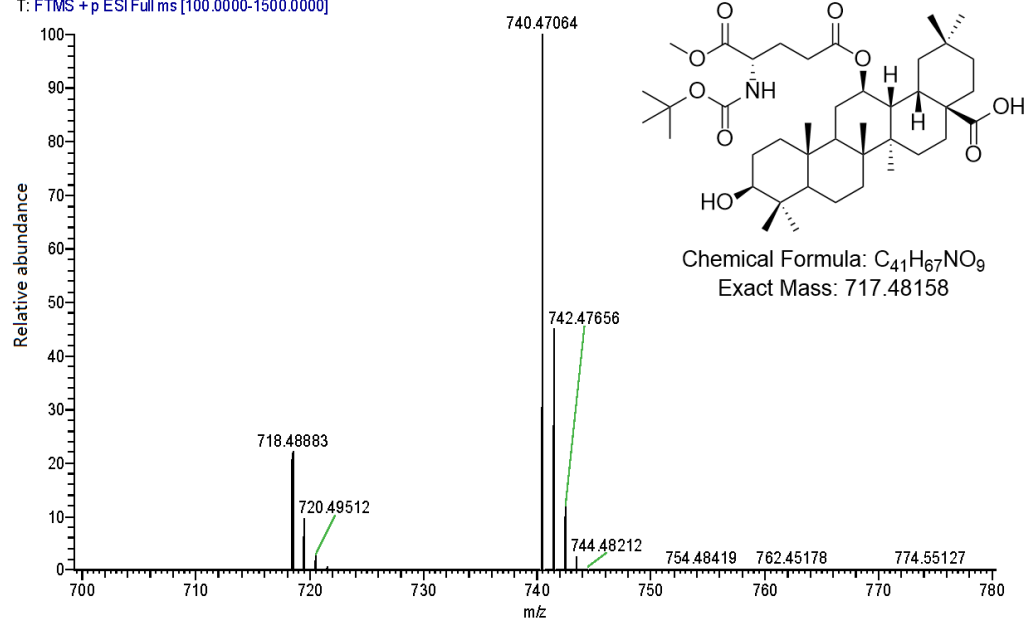

| m/z       | Theo. Mass | Delta (ppm) | RDB equiv. | Composition     |      |
|-----------|------------|-------------|------------|-----------------|------|
| 740.47064 | 740.47080  | -0.164      | 8.5        | C41 H67 O9 N Na | M+Na |

Fig. S109. HRMS of compound **20a**

mh-8-28-2 #855 RT: 8.47 AV: 1 NL: 1.35E9  
T: FTMS + p ESI Full ms [100.0000-1500.0000]

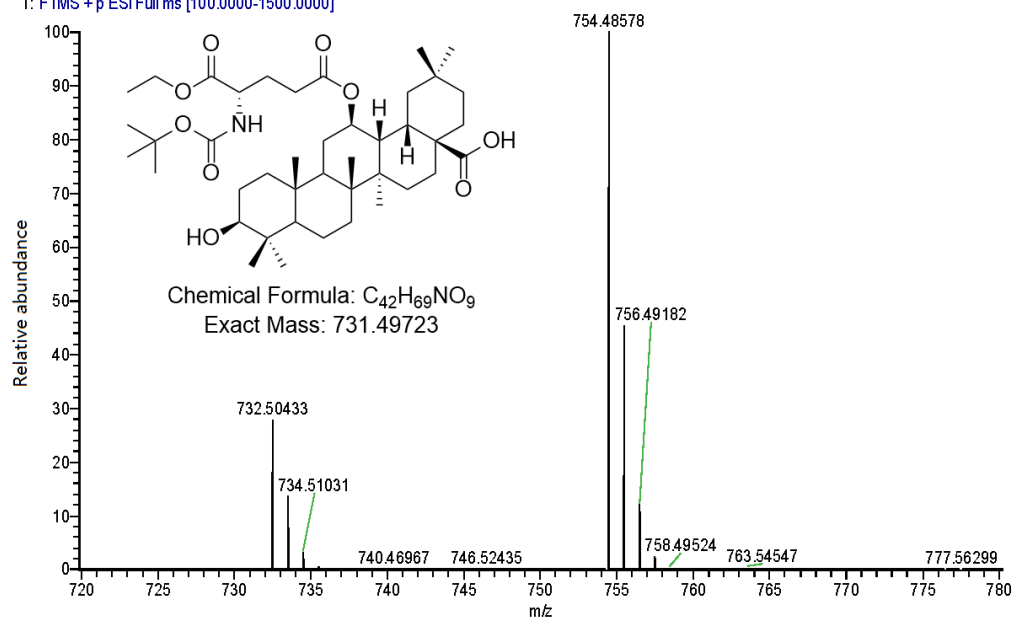

| m/z       | Theo. Mass | Delta (ppm) | RDB equiv. | Composition     |      |
|-----------|------------|-------------|------------|-----------------|------|
| 754.48578 | 754.48645  | -0.674      | 8.5        | C42 H69 O9 N Na | M+Na |

Fig. S110. HRMS of compound **20b**

mh-8-28-3 #867 RT: 8.59 AV: 1 NL: 1.24E9  
T: FTMS + p ESI Full ms [100.0000-1500.0000]

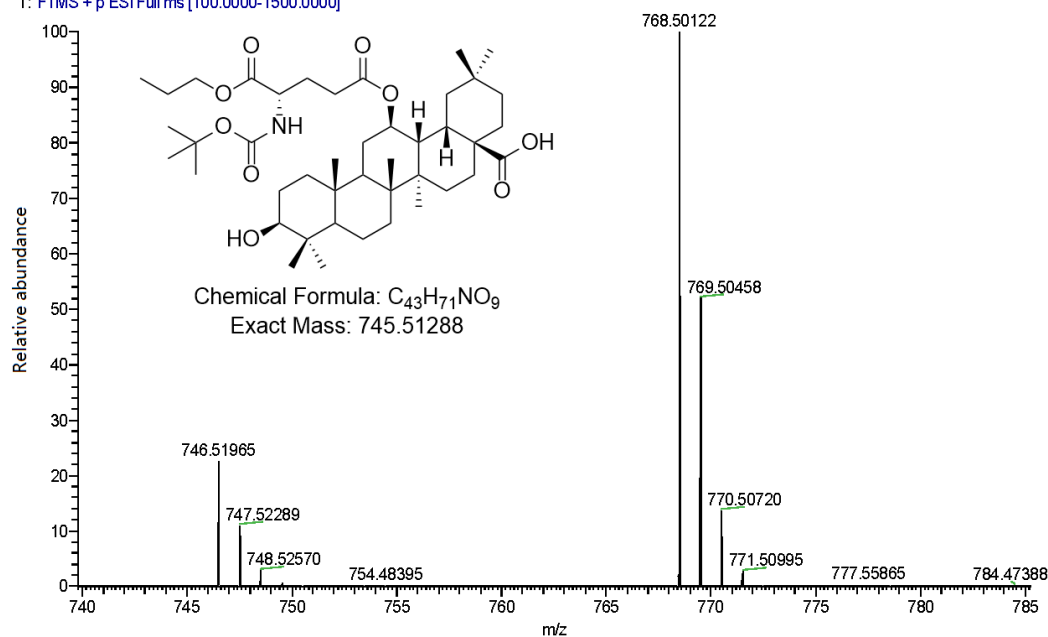

| m/z       | Theo. Mass | Delta (ppm) | RDB equiv. | Composition     |      |
|-----------|------------|-------------|------------|-----------------|------|
| 768.50122 | 768.50210  | -0.884      | 8.5        | C43 H71 O9 N Na | M+Na |

Fig. S111. HRMS of compound **20c**

mh-8-28-4 #869 RT: 8.62 AV: 1 NL: 1.18E9  
T: FTMS + p ESI Full ms [100.0000-1500.0000]

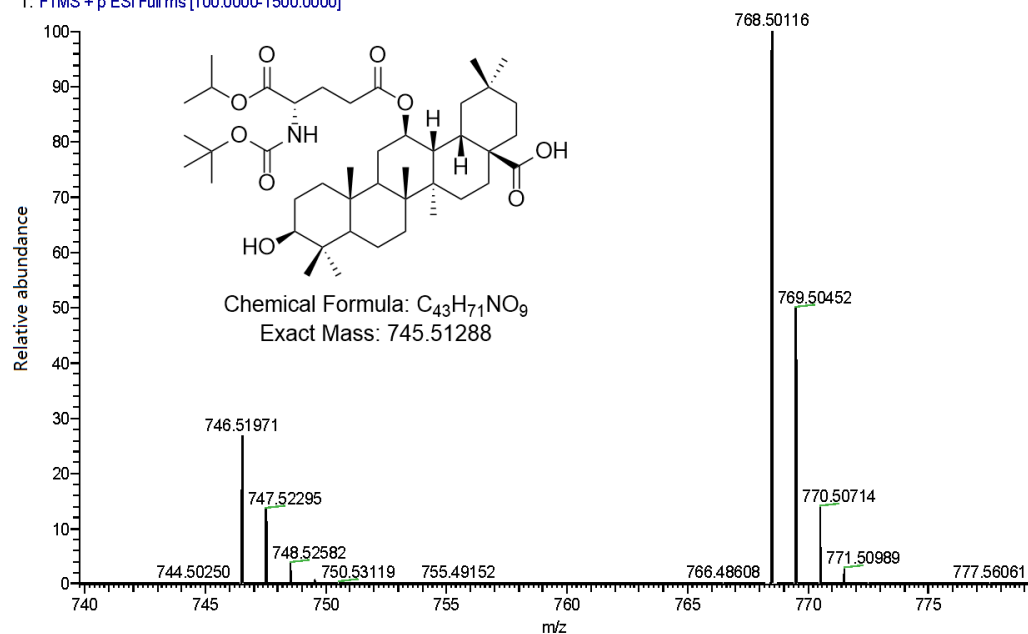

| m/z       | Theo. Mass | Delta (ppm) | RDB equiv. | Composition     |      |
|-----------|------------|-------------|------------|-----------------|------|
| 768.50116 | 768.50210  | -0.944      | 8.5        | C43 H71 O9 N Na | M+Na |

Fig. S112. HRMS of compound **20d**

mh-8-28-5 #869 RT: 8.65 AV: 1 NL: 6.26E8  
T: FTMS + p ESI Full ms [100.0000-1500.0000]

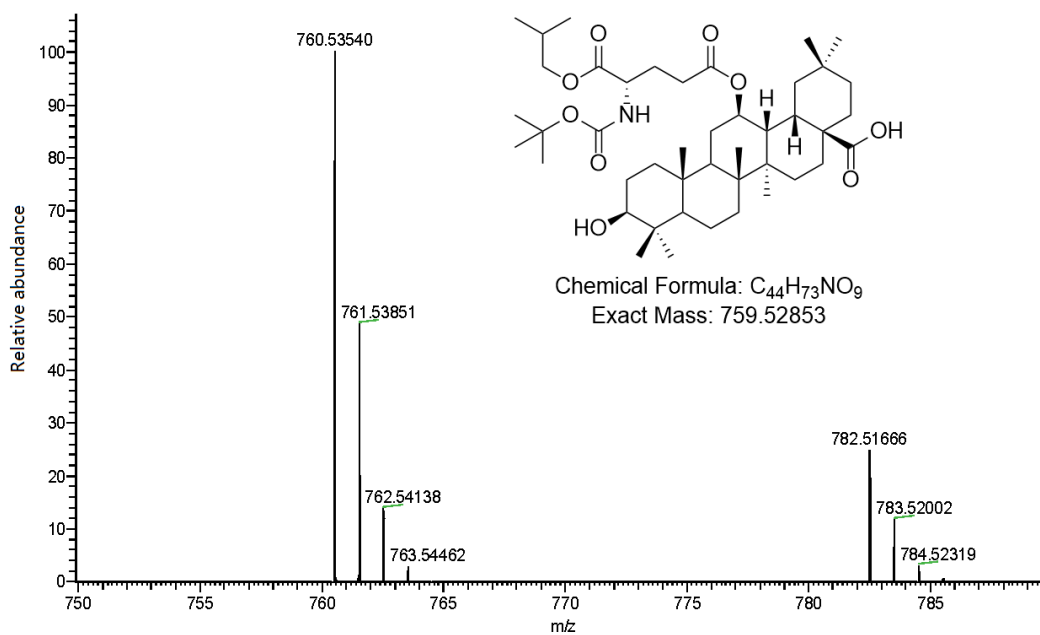

| m/z       | Theo. Mass | Delta (ppm) | RDB equiv. | Composition  |     |
|-----------|------------|-------------|------------|--------------|-----|
| 760.53540 | 760.53581  | -0.409      | 8.5        | C44 H74 O9 N | M+H |

Fig. S113. HRMS of compound 20e

mh-8-28-6 #867 RT: 8.65 AV: 1 NL: 8.08E8  
T: FTMS + p ESI Full ms [100.0000-1500.0000]

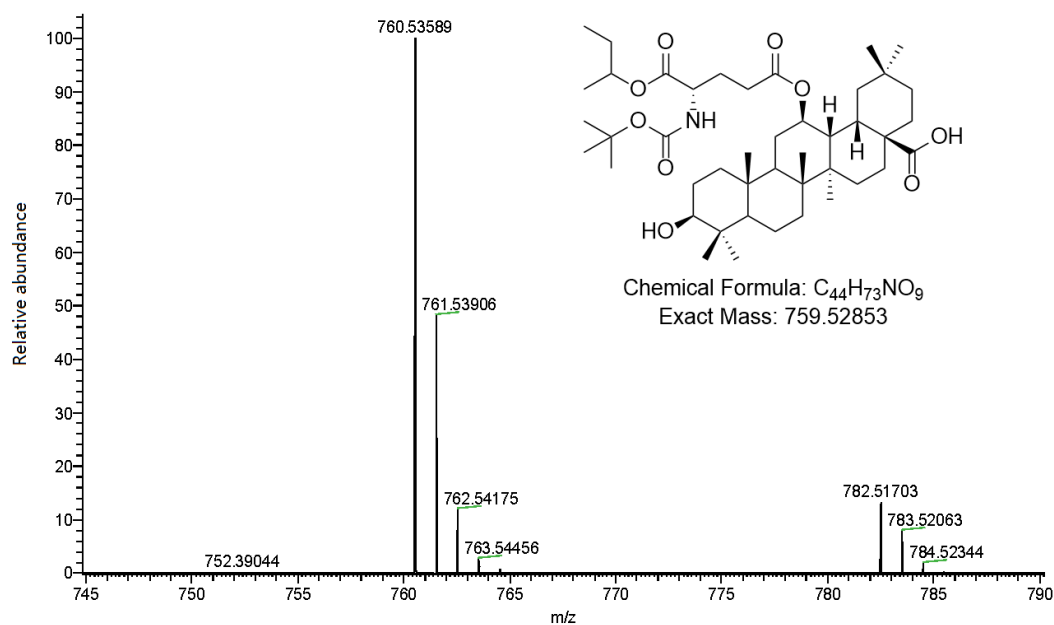

| m/z       | Theo. Mass | Delta (ppm) | RDB equiv. | Composition  |     |
|-----------|------------|-------------|------------|--------------|-----|
| 760.53589 | 760.53581  | 0.081       | 8.5        | C44 H74 O9 N | M+H |

Fig. S114. HRMS of compound 20f

mh-8-28-7 #871 RT: 8.68 AV: 1 NL: 6.44E8  
T: FTMS + p ESI Full ms [100.0000-1500.0000]

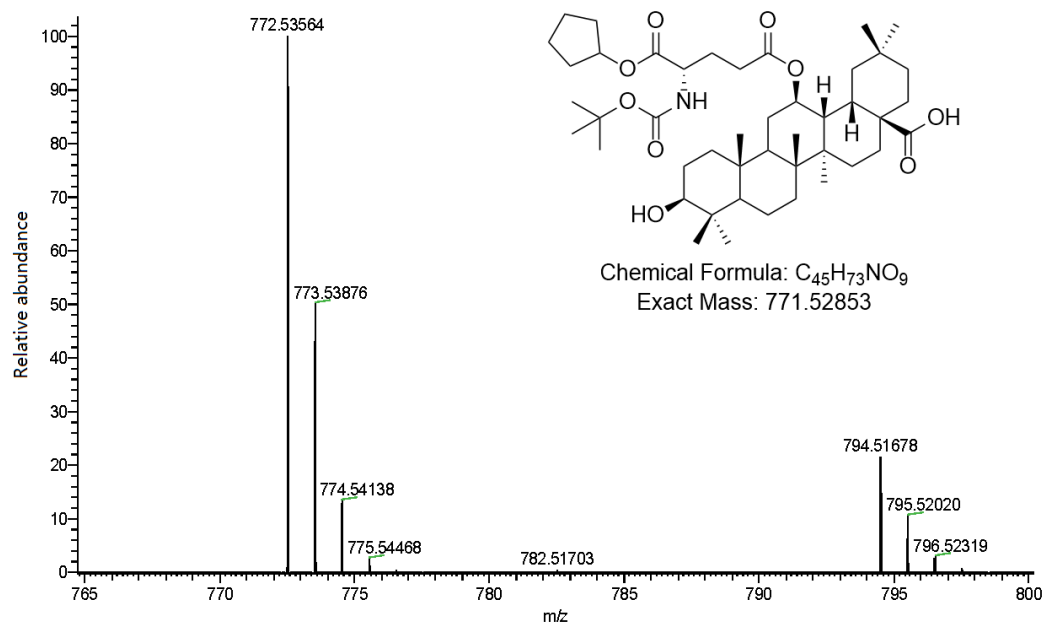

| m/z       | Theo. Mass | Delta (ppm) | RDB equiv. | Composition  |     |
|-----------|------------|-------------|------------|--------------|-----|
| 772.53564 | 772.53581  | -0.169      | 9.5        | C45 H74 O9 N | M+H |

**Fig. S115.** HRMS of compound **20g**
